# Supplementary material for: Posttraumatic stress disorder symptoms among child survivors of the 2008 Wenchuan earthquake: a comparison between Chinese ethnic Han and Hui groups
Source: PeerJ. 2021 Aug 11;9:e11967. doi: 10.7717/peerj.11967 (PMC8364314; doi:10.7717/peerj.11967)
Supplement: Supplemental Information 1 [file peerj-09-11967-s001.xlsx]

## Sheet: avoidance+numbness score
Model 1
Model Summaryb
Model	R	R Square	Adjusted R Square	Std. Error of the Estimate	Durbin-Watson
	.066a	0.004	0.004	4.62675	0.543
a Predictors: (Constant), ethnic
b Dependent Variable: C avoidance+numb score
		Unstandardized Coefficients		Standardized Coefficients	t	Sig.	95.0% Confidence Interval for B
		B	Std. Error	Beta			Lower Bound	Upper Bound
	(Constant)	9.043	0.105		86.326	0	8.837	9.248
	ethnic	0.974	0.312	0.066	3.116	0.002	0.361	1.586
a Dependent Variable: C avoidance+numb score
Model 2
Model Summaryb
Model	R	R Square	Adjusted R Square	Std. Error of the Estimate	Durbin-Watson
1	.175a	0.031	0.029	4.5693	0.563
a Predictors: (Constant), Removal to another area after earthquake, sex, residence, age, ethnic
b Dependent Variable: C avoidance+numb score
Coefficientsa
Model		Unstandardized Coefficients		Standardized Coefficients	t	Sig.	95.0% Confidence Interval for B
		B	Std. Error	Beta			Lower Bound	Upper Bound
1	(Constant)	12.226	0.519		23.543	0	11.207	13.244
	sex	0.117	0.195	0.013	0.6	0.549	-0.266	0.5
	age	-0.294	0.042	-0.149	-7.07	0	-0.376	-0.213
	ethnic	0.764	0.311	0.052	2.46	0.014	0.155	1.373
	residence	-0.102	0.358	-0.006	-0.286	0.775	-0.804	0.599
	Removal to another area after earthquake	0.512	0.199	0.054	2.57	0.01	0.121	0.903
a Dependent Variable: C avoidance+numb score
Model 3
Model Summaryb
Model	R	R Square	Adjusted R Square	Std. Error of the Estimate	Durbin-Watson
1	.409a	0.167	0.164	4.2387	0.851
a Predictors: (Constant), L score, residence, ethnic, Removal to another area after earthquake, sex, age, E score, N score, P score
b Dependent Variable: C avoidance+numb score
Coefficientsa
Model		Unstandardized Coefficients		Standardized Coefficients	t	Sig.	95.0% Confidence Interval for B
		B	Std. Error	Beta			Lower Bound	Upper Bound
1	(Constant)	3.583	1.001		3.578	0	1.619	5.546
	sex	0.136	0.184	0.015	0.737	0.461	-0.225	0.496
	age	-0.27	0.039	-0.137	-6.892	0	-0.347	-0.193
	ethnic	0.826	0.288	0.056	2.865	0.004	0.261	1.392
	residence	-0.312	0.332	-0.018	-0.941	0.347	-0.964	0.339
	Removal to another area after earthquake	0.118	0.187	0.012	0.629	0.529	-0.249	0.484
	P score	0.029	0.009	0.072	3.139	0.002	0.011	0.047
	E score	-0.045	0.008	-0.106	-5.363	0	-0.062	-0.029
	N score	0.153	0.01	0.325	14.815	0	0.133	0.173
	L score	0.021	0.009	0.047	2.188	0.029	0.002	0.039
a Dependent Variable: C avoidance+numb score
Model 4
Model Summaryb
Model	R	R Square	Adjusted R Square	Std. Error of the Estimate	Durbin-Watson
1	.430a	0.185	0.18	4.19828	0.904
a Predictors: (Constant), Injured, ethnic, Saw any one dead or injured, residence, L score, sex, Removal to another area after earthquake, Lost home or important belongings, E score, Lost close family member or friend, age, N score, Close family member or friend was injured, P score
b Dependent Variable: C avoidance+numb score
Coefficientsa
Model		Unstandardized Coefficients		Standardized Coefficients	t	Sig.	95.0% Confidence Interval for B
		B	Std. Error	Beta			Lower Bound	Upper Bound
1	(Constant)	3.053	0.998		3.06	0.002	1.096	5.01
	sex	0.13	0.182	0.014	0.713	0.476	-0.227	0.487
	age	-0.279	0.04	-0.141	-6.947	0	-0.357	-0.2
	ethnic	0.724	0.287	0.049	2.527	0.012	0.162	1.286
	residence	-0.243	0.33	-0.014	-0.736	0.462	-0.889	0.404
	Removal to another area after earthquake	0.038	0.186	0.004	0.206	0.837	-0.327	0.404
	P score	0.03	0.009	0.076	3.305	0.001	0.012	0.048
	E score	-0.047	0.008	-0.11	-5.553	0	-0.063	-0.03
	N score	0.148	0.01	0.315	14.415	0	0.128	0.168
	L score	0.024	0.009	0.055	2.554	0.011	0.006	0.043
	Lost home or important belongings	0.684	0.188	0.072	3.637	0	0.315	1.053
	Close family member or friend was injured	0.681	0.213	0.067	3.202	0.001	0.264	1.098
	Lost close family member or friend	0.703	0.27	0.054	2.602	0.009	0.173	1.233
	Saw any one dead or injured	0.008	0.195	0.001	0.039	0.969	-0.375	0.391
	Injured	0.397	0.38	0.021	1.042	0.297	-0.35	1.143
a Dependent Variable: C avoidance+numb score
Model 5
Model Summaryb
Model	R	R Square	Adjusted R Square	Std. Error of the Estimate	Durbin-Watson
1	.442a	0.195	0.188	4.17771	0.939
a Predictors: (Constant), Felt panic of others, residence, Injured, ethnic, Saw any one dead or injured, L score, sex, Felt unable to escape from the disaster, Removal to another area after earthquake, E score, Lost home or important belongings, Trapped for a longer time, Felt extreme panic or fear, Close family member or friend was injured, N score, Felt one’s own or others' life to have been in…
b Dependent Variable: C avoidance+numb score
Coefficientsa
Model		Unstandardized Coefficients		Standardized Coefficients	t	Sig.	95.0% Confidence Interval for B
		B	Std. Error	Beta			Lower Bound	Upper Bound
1	(Constant)	1.664	1.039		1.6	0.11	-0.375	3.702
	sex	0.183	0.182	0.02	1.003	0.316	-0.175	0.541
	age	-0.242	0.041	-0.123	-5.871	0	-0.323	-0.161
	ethnic	0.606	0.286	0.041	2.115	0.035	0.044	1.167
	residence	-0.231	0.329	-0.014	-0.702	0.483	-0.875	0.414
	Removal to another area after earthquake	0.032	0.186	0.003	0.173	0.863	-0.332	0.396
	P score	0.034	0.009	0.085	3.706	0	0.016	0.051
	E score	-0.049	0.008	-0.114	-5.788	0	-0.065	-0.032
	N score	0.142	0.01	0.302	13.754	0	0.122	0.162
	L score	0.026	0.009	0.059	2.771	0.006	0.008	0.045
	Lost home or important belongings	0.545	0.189	0.057	2.878	0.004	0.174	0.916
	Close family member or friend was injured	0.63	0.212	0.062	2.969	0.003	0.214	1.046
	Lost close family member or friend	0.639	0.271	0.049	2.36	0.018	0.108	1.17
	Saw any one dead or injured	-0.075	0.197	-0.008	-0.382	0.703	-0.461	0.311
	Injured	0.327	0.379	0.017	0.863	0.388	-0.417	1.072
	Trapped for a longer time	0.343	0.196	0.036	1.75	0.08	-0.041	0.728
	Felt extreme panic or fear	0.362	0.245	0.03	1.474	0.141	-0.119	0.843
	Felt unable to escape from the disaster	0.566	0.19	0.061	2.97	0.003	0.192	0.939
	Felt one’s own or others' life to have been in danger	0.09	0.205	0.009	0.44	0.66	-0.312	0.492
	Felt panic of others	0.518	0.272	0.038	1.906	0.057	-0.015	1.051
a Dependent Variable: C avoidance+numb score

## Sheet: arousal score
Model 1
Model Summaryb
Model	R	R Square	Adjusted R Square	Std. Error of the Estimate	Durbin-Watson
1	.052a	0.003	0.002	3.44342	0.758
a Predictors: (Constant), ethnic
b Dependent Variable: D arousal score
Coefficientsa
Model		Unstandardized Coefficients		Standardized Coefficients	t	Sig.	95.0% Confidence Interval for B
		B	Std. Error	Beta			Lower Bound	Upper Bound
1	(Constant)	8.788	0.078		112.731	0	8.635	8.941
	ethnic	0.568	0.233	0.052	2.442	0.015	0.112	1.024
a Dependent Variable: D arousal score
Model 2
Model Summaryb
Model	R	R Square	Adjusted R Square	Std. Error of the Estimate	Durbin-Watson
1	.146a	0.021	0.019	3.41412	0.767
a Predictors: (Constant), Removal to another area after earthquake, sex, residence, age, ethnic
b Dependent Variable: D arousal score
Coefficientsa
Model		Unstandardized Coefficients		Standardized Coefficients	t	Sig.	95.0% Confidence Interval for B
		B	Std. Error	Beta			Lower Bound	Upper Bound
1	(Constant)	8.584	0.388		22.122	0	7.823	9.345
	sex	-0.896	0.146	-0.13	-6.138	0	-1.182	-0.61
	age	0.05	0.031	0.034	1.619	0.106	-0.011	0.111
	ethnic	0.664	0.232	0.061	2.862	0.004	0.209	1.119
	residence	-0.173	0.267	-0.014	-0.646	0.518	-0.697	0.351
	Removal to another area after earthquake	0.148	0.149	0.021	0.992	0.321	-0.144	0.44
a Dependent Variable: D arousal score
Model 3
Model Summaryb
Model	R	R Square	Adjusted R Square	Std. Error of the Estimate	Durbin-Watson
1	.376a	0.141	0.138	3.20086	1.041
a Predictors: (Constant), L score, residence, ethnic, Removal to another area after earthquake, sex, age, E score, N score, P score
b Dependent Variable: D arousal score
Model		Unstandardized Coefficients		Standardized Coefficients	t	Sig.	95.0% Confidence Interval for B
		B	Std. Error	Beta			Lower Bound	Upper Bound
1	(Constant)	2.69	0.756		3.558	0	1.207	4.173
	sex	-0.865	0.139	-0.126	-6.232	0	-1.138	-0.593
	age	0.038	0.03	0.026	1.287	0.198	-0.02	0.096
	ethnic	0.628	0.218	0.058	2.883	0.004	0.201	1.055
	residence	-0.372	0.251	-0.03	-1.483	0.138	-0.864	0.12
	Removal to another area after earthquake	-0.052	0.141	-0.007	-0.367	0.714	-0.329	0.225
	P score	-0.024	0.007	-0.082	-3.527	0	-0.038	-0.011
	E score	0.004	0.006	0.013	0.655	0.513	-0.008	0.017
	N score	0.133	0.008	0.38	17.042	0	0.117	0.148
	L score	0.007	0.007	0.02	0.929	0.353	-0.007	0.021
a Dependent Variable: D arousal score
Model 4
Model Summaryb
Model	R	R Square	Adjusted R Square	Std. Error of the Estimate	Durbin-Watson
1	.406a	0.165	0.16	3.15985	1.103
a Predictors: (Constant), Injured, ethnic, Saw any one dead or injured, residence, L score, sex, Removal to another area after earthquake, Lost home or important belongings, E score, Lost close family member or friend, age, N score, Close family member or friend was injured, P score
b Dependent Variable: D arousal score
Coefficientsa
Model		Unstandardized Coefficients		Standardized Coefficients	t	Sig.	95.0% Confidence Interval for B
		B	Std. Error	Beta			Lower Bound	Upper Bound
1	(Constant)	2.181	0.751		2.904	0.004	0.708	3.653
	sex	-0.87	0.137	-0.126	-6.34	0	-1.139	-0.601
	age	0.014	0.03	0.01	0.474	0.636	-0.045	0.073
	ethnic	0.558	0.216	0.051	2.586	0.01	0.135	0.981
	residence	-0.317	0.248	-0.025	-1.279	0.201	-0.804	0.169
	Removal to another area after earthquake	-0.151	0.14	-0.022	-1.075	0.283	-0.426	0.124
	P score	-0.022	0.007	-0.074	-3.22	0.001	-0.035	-0.009
	E score	0.002	0.006	0.007	0.372	0.71	-0.01	0.015
	N score	0.129	0.008	0.369	16.71	0	0.114	0.144
	L score	0.009	0.007	0.026	1.212	0.226	-0.005	0.022
	Lost home or important belongings	0.764	0.142	0.108	5.398	0	0.487	1.042
	Close family member or friend was injured	-0.022	0.16	-0.003	-0.138	0.89	-0.336	0.292
	Lost close family member or friend	0.135	0.203	0.014	0.664	0.507	-0.264	0.534
	Saw any one dead or injured	0.574	0.147	0.08	3.901	0	0.285	0.862
	Injured	0.704	0.286	0.051	2.459	0.014	0.143	1.266
a Dependent Variable: D arousal score
Model 5
Model Summaryb
Model	R	R Square	Adjusted R Square	Std. Error of the Estimate	Durbin-Watson
1	.437a	0.191	0.184	3.11415	1.17
a Predictors: (Constant), Felt panic of others, residence, Injured, ethnic, Saw any one dead or injured, L score, sex, Felt unable to escape from the disaster, Removal to another area after earthquake, E score, Lost home or important belongings, Trapped for a longer time, Felt extreme panic or fear, Close family member or friend was injured, N score, Felt one’s own or others' life to have been in…
b Dependent Variable: D arousal score
Coefficientsa
Model		Unstandardized Coefficients		Standardized Coefficients	t	Sig.	95.0% Confidence Interval for B
		B	Std. Error	Beta			Lower Bound	Upper Bound
1	(Constant)	0.546	0.775		0.705	0.481	-0.973	2.066
	sex	-0.787	0.136	-0.114	-5.786	0	-1.054	-0.52
	age	0.062	0.031	0.042	2.025	0.043	0.002	0.122
	ethnic	0.408	0.213	0.037	1.914	0.056	-0.01	0.827
	residence	-0.273	0.245	-0.022	-1.113	0.266	-0.753	0.208
	Removal to another area after earthquake	-0.155	0.138	-0.022	-1.12	0.263	-0.426	0.116
	P score	-0.018	0.007	-0.061	-2.657	0.008	-0.031	-0.005
	E score	0.001	0.006	0.002	0.083	0.934	-0.012	0.013
	N score	0.121	0.008	0.347	15.782	0	0.106	0.136
	L score	0.01	0.007	0.03	1.396	0.163	-0.004	0.024
	Lost home or important belongings	0.593	0.141	0.084	4.205	0	0.317	0.87
	Close family member or friend was injured	-0.097	0.158	-0.013	-0.611	0.541	-0.407	0.214
	Lost close family member or friend	0.082	0.202	0.009	0.408	0.683	-0.313	0.478
	Saw any one dead or injured	0.453	0.147	0.063	3.09	0.002	0.166	0.741
	Injured	0.597	0.283	0.043	2.112	0.035	0.043	1.152
	Trapped for a longer time	0.47	0.146	0.067	3.213	0.001	0.183	0.757
	Felt extreme panic or fear	0.713	0.183	0.079	3.899	0	0.354	1.072
	Felt unable to escape from the disaster	0.523	0.142	0.076	3.682	0	0.244	0.801
	Felt one’s own or others' life to have been in danger	0.248	0.153	0.034	1.625	0.104	-0.051	0.548
	Felt panic of others	0.313	0.203	0.031	1.543	0.123	-0.085	0.71
a Dependent Variable: D arousal score

## Sheet: PTSD total score
Model 1
Model Summaryb
Model	R	R Square	Adjusted R Square	Std. Error of the Estimate	Durbin-Watson
1	.065a	0.004	0.004	9.18178	0.023
a Predictors: (Constant), ethnic
b Dependent Variable: PTSD total score
Coefficientsa
Model		Unstandardized Coefficients		Standardized Coefficients	t	Sig.	95.0% Confidence Interval for B
		B	Std. Error	Beta			Lower Bound	Upper Bound
1	(Constant)	25.12	0.208		120.843	0	24.712	25.528
	ethnic	1.888	0.62	0.065	3.045	0.002	0.672	3.104
a Dependent Variable: PTSD total score
Model 2
Model Summaryb
Model	R	R Square	Adjusted R Square	Std. Error of the Estimate	Durbin-Watson
1	.158a	0.025	0.023	9.09359	0.037
a Predictors: (Constant), Removal to another area after earthquake, sex, residence, age, ethnic
b Dependent Variable: PTSD total score
Coefficientsa
Model		Unstandardized Coefficients		Standardized Coefficients	t	Sig.	95.0% Confidence Interval for B
		B	Std. Error	Beta			Lower Bound	Upper Bound
1	(Constant)	30.205	1.033		29.227	0	28.178	32.232
	sex	-1.508	0.389	-0.082	-3.878	0	-2.271	-0.745
	age	-0.408	0.083	-0.104	-4.918	0	-0.57	-0.245
	ethnic	1.723	0.618	0.059	2.789	0.005	0.511	2.935
	residence	-0.307	0.712	-0.009	-0.431	0.667	-1.703	1.089
	Removal to another area after earthquake	1.044	0.397	0.056	2.631	0.009	0.266	1.821
a Dependent Variable: PTSD total score
Model 3
Model Summaryb
Model	R	R Square	Adjusted R Square	Std. Error of the Estimate	Durbin-Watson
1	.440a	0.194	0.19	8.27673	0.37
a Predictors: (Constant), L score, residence, ethnic, Removal to another area after earthquake, sex, age, E score, N score, P score
b Dependent Variable: PTSD total score
Coefficientsa
Model		Unstandardized Coefficients		Standardized Coefficients	t	Sig.	95.0% Confidence Interval for B
		B	Std. Error	Beta			Lower Bound	Upper Bound
1	(Constant)	8.348	1.955		4.269	0	4.513	12.182
	sex	-1.459	0.359	-0.079	-4.062	0	-2.163	-0.754
	age	-0.406	0.077	-0.104	-5.297	0	-0.556	-0.256
	ethnic	1.711	0.563	0.059	3.038	0.002	0.606	2.816
	residence	-0.856	0.649	-0.025	-1.319	0.187	-2.128	0.416
	Removal to another area after earthquake	0.233	0.365	0.012	0.638	0.524	-0.483	0.948
	P score	0.01	0.018	0.012	0.54	0.589	-0.025	0.045
	E score	-0.038	0.016	-0.045	-2.294	0.022	-0.07	-0.005
	N score	0.388	0.02	0.417	19.278	0	0.349	0.428
	L score	0.065	0.018	0.074	3.526	0	0.029	0.101
a Dependent Variable: PTSD total score
Model 4
Model Summaryb
Model	R	R Square	Adjusted R Square	Std. Error of the Estimate	Durbin-Watson
1	.476a	0.226	0.221	8.11679	0.438
a Predictors: (Constant), Injured, ethnic, Saw any one dead or injured, residence, L score, sex, Removal to another area after earthquake, Lost home or important belongings, E score, Lost close family member or friend, age, N score, Close family member or friend was injured, P score
b Dependent Variable: PTSD total score
Coefficientsa
Model		Unstandardized Coefficients		Standardized Coefficients	t	Sig.	95.0% Confidence Interval for B
		B	Std. Error	Beta			Lower Bound	Upper Bound
1	(Constant)	6.717	1.929		3.482	0.001	2.934	10.5
	sex	-1.475	0.352	-0.08	-4.185	0	-2.166	-0.784
	age	-0.451	0.078	-0.115	-5.822	0	-0.603	-0.299
	ethnic	1.453	0.554	0.05	2.624	0.009	0.367	2.54
	residence	-0.666	0.637	-0.02	-1.045	0.296	-1.915	0.584
	Removal to another area after earthquake	-0.035	0.36	-0.002	-0.096	0.923	-0.741	0.672
	P score	0.015	0.018	0.019	0.855	0.393	-0.019	0.049
	E score	-0.043	0.016	-0.051	-2.632	0.009	-0.075	-0.011
	N score	0.374	0.02	0.402	18.896	0	0.336	0.413
	L score	0.075	0.018	0.086	4.114	0	0.039	0.111
	Lost home or important belongings	2.044	0.364	0.108	5.619	0	1.331	2.757
	Close family member or friend was injured	1.482	0.411	0.073	3.604	0	0.675	2.288
	Lost close family member or friend	1.277	0.523	0.05	2.443	0.015	0.252	2.302
	Saw any one dead or injured	0.733	0.378	0.038	1.94	0.052	-0.008	1.473
	Injured	1.766	0.736	0.048	2.4	0.016	0.323	3.208
a Dependent Variable: PTSD total score
Model 5
Model Summaryb
Model	R	R Square	Adjusted R Square	Std. Error of the Estimate	Durbin-Watson
1	.510a	0.261	0.254	7.94474	0.501
a Predictors: (Constant), Felt panic of others, residence, Injured, ethnic, Saw any one dead or injured, L score, sex, Felt unable to escape from the disaster, Removal to another area after earthquake, E score, Lost home or important belongings, Trapped for a longer time, Felt extreme panic or fear, Close family member or friend was injured, N score, Felt one’s own or others' life to have been in…
b Dependent Variable: PTSD total score
Coefficientsa
Model		Unstandardized Coefficients		Standardized Coefficients	t	Sig.	95.0% Confidence Interval for B
		B	Std. Error	Beta			Lower Bound	Upper Bound
1	(Constant)	1.63	1.977		0.825	0.41	-2.246	5.506
	sex	-1.23	0.347	-0.067	-3.543	0	-1.91	-0.549
	age	-0.312	0.078	-0.08	-3.979	0	-0.466	-0.158
	ethnic	1.002	0.544	0.034	1.841	0.066	-0.065	2.07
	residence	-0.575	0.625	-0.017	-0.92	0.357	-1.801	0.65
	Removal to another area after earthquake	-0.041	0.353	-0.002	-0.116	0.907	-0.734	0.651
	P score	0.028	0.017	0.036	1.637	0.102	-0.006	0.062
	E score	-0.049	0.016	-0.058	-3.083	0.002	-0.081	-0.018
	N score	0.351	0.02	0.376	17.883	0	0.312	0.389
	L score	0.079	0.018	0.091	4.436	0	0.044	0.114
	Lost home or important belongings	1.526	0.36	0.081	4.24	0	0.82	2.232
	Close family member or friend was injured	1.291	0.404	0.064	3.199	0.001	0.5	2.083
	Lost close family member or friend	1.127	0.515	0.044	2.188	0.029	0.117	2.137
	Saw any one dead or injured	0.438	0.374	0.023	1.171	0.242	-0.295	1.172
	Injured	1.496	0.722	0.04	2.073	0.038	0.081	2.911
	Trapped for a longer time	1.199	0.373	0.064	3.214	0.001	0.468	1.931
	Felt extreme panic or fear	2.152	0.467	0.09	4.613	0	1.237	3.067
	Felt unable to escape from the disaster	1.905	0.362	0.104	5.259	0	1.195	2.615
	Felt one’s own or others' life to have been in danger	0.232	0.39	0.012	0.595	0.552	-0.533	0.997
	Felt panic of others	1.435	0.517	0.053	2.776	0.006	0.421	2.448
a Dependent Variable: PTSD total score

## Sheet: D criteria
Model 1
Model Summary
Step	-2 Log likelihood	Cox & Snell R Square	Nagelkerke R Square
1	2995.795a	0.002	0.002
a Estimation terminated at iteration number 3 because parameter estimates changed by less than .001.
Variables in the Equation
		B	S.E.	Wald	df	Sig.	Exp(B)	95% C.I.for EXP(B)
								Lower	Upper
Step 1a	ethnic	0.269	0.135	3.953	1	0.047	1.309	1.004	1.706
	Constant	-0.326	0.046	50.411	1	0	0.722
a Variable(s) entered on step 1: ethnic.
Model 2
Model Summary
Step	-2 Log likelihood	Cox & Snell R Square	Nagelkerke R Square
1	2969.005a	0.014	0.019
a Estimation terminated at iteration number 3 because parameter estimates changed by less than .001.
Variables in the Equation
		B	S.E.	Wald	df	Sig.	Exp(B)	95% C.I.for EXP(B)
								Lower	Upper
Step 1a	sex	-0.433	0.087	24.619	1	0	0.649	0.547	0.77
	age	-0.007	0.019	0.128	1	0.721	0.993	0.958	1.03
	ethnic	0.298	0.137	4.713	1	0.03	1.347	1.029	1.762
	residence	-0.048	0.16	0.088	1	0.766	0.954	0.697	1.304
	Removal to another area after earthquake	0.126	0.089	2.031	1	0.154	1.135	0.954	1.35
	Constant	-0.092	0.231	0.16	1	0.689	0.912
a Variable(s) entered on step 1: sex, age, ethnic, residence, Removal to another area after earthquake.
Model 3
Model Summary
Step	-2 Log likelihood	Cox & Snell R Square	Nagelkerke R Square
1	2815.775a	0.08	0.108
a Estimation terminated at iteration number 4 because parameter estimates changed by less than .001.
Variables in the Equation
		B	S.E.	Wald	df	Sig.	Exp(B)	95% C.I.for EXP(B)
								Lower	Upper
Step 1a	sex	-0.383	0.091	17.564	1	0	0.682	0.57	0.815
	age	-0.009	0.019	0.205	1	0.651	0.991	0.954	1.03
	ethnic	0.308	0.142	4.744	1	0.029	1.361	1.031	1.797
	residence	-0.155	0.166	0.874	1	0.35	0.857	0.619	1.185
	Removal to another area after earthquake	0.068	0.093	0.536	1	0.464	1.07	0.892	1.284
	P score	-0.018	0.005	16.319	1	0	0.982	0.973	0.991
	E score	0.016	0.004	13.493	1	0	1.016	1.007	1.024
	N score	0.055	0.005	108.035	1	0	1.057	1.046	1.068
	L score	-0.02	0.005	18.008	1	0	0.98	0.971	0.989
	Constant	-1.708	0.499	11.718	1	0.001	0.181
a Variable(s) entered on step 1: sex, age, ethnic, residence, Removal to another area after earthquake, P score, E score, N score, L score.
Model 4
Model Summary
Step	-2 Log likelihood	Cox & Snell R Square	Nagelkerke R Square
1	2783.472a	0.094	0.126
a Estimation terminated at iteration number 4 because parameter estimates changed by less than .001.
Variables in the Equation
		B	S.E.	Wald	df	Sig.	Exp(B)	95% C.I.for EXP(B)
								Lower	Upper
Step 1a	sex	-0.39	0.092	17.896	1	0	0.677	0.565	0.811
	age	-0.025	0.02	1.507	1	0.22	0.975	0.938	1.015
	ethnic	0.277	0.143	3.764	1	0.052	1.319	0.997	1.745
	residence	-0.115	0.167	0.473	1	0.491	0.891	0.642	1.237
	Removal to another area after earthquake	0.031	0.094	0.108	1	0.743	1.031	0.858	1.24
	P score	-0.017	0.005	13.866	1	0	0.983	0.974	0.992
	E score	0.015	0.004	11.436	1	0.001	1.015	1.006	1.024
	N score	0.055	0.005	103.924	1	0	1.056	1.045	1.068
	L score	-0.018	0.005	14.699	1	0	0.982	0.973	0.991
	Lost home or important belongings	0.41	0.096	18.273	1	0	1.507	1.249	1.819
	Close family member or friend was injured	0.112	0.107	1.108	1	0.292	1.119	0.908	1.379
	Lost close family member or friend	-0.08	0.136	0.349	1	0.554	0.923	0.707	1.205
	Saw any one dead or injured	0.242	0.099	5.949	1	0.015	1.274	1.049	1.548
	Injured	0.189	0.192	0.964	1	0.326	1.208	0.829	1.76
	Constant	-2.023	0.507	15.916	1	0	0.132
a Variable(s) entered on step 1: sex, age, ethnic, residence, Removal to another area after earthquake, P score, E score, N score, L score, Lost home or important belongings, Close family member or friend was injured, Lost close family member or friend, Saw any one dead or injured, Injured.
Model 5
Model Summary
Step	-2 Log likelihood	Cox & Snell R Square	Nagelkerke R Square
1	2727.204a	0.117	0.157
a Estimation terminated at iteration number 4 because parameter estimates changed by less than .001.
Variables in the Equation
		B	S.E.	Wald	df	Sig.	Exp(B)	95% C.I.for EXP(B)
								Lower	Upper
Step 1a	sex	-0.353	0.094	14.117	1	0	0.703	0.585	0.845
	age	0.006	0.021	0.071	1	0.789	1.006	0.965	1.048
	ethnic	0.192	0.145	1.75	1	0.186	1.212	0.912	1.61
	residence	-0.091	0.17	0.285	1	0.593	0.913	0.655	1.274
	Removal to another area after earthquake	0.022	0.096	0.055	1	0.814	1.023	0.848	1.233
	P score	-0.015	0.005	10.004	1	0.002	0.985	0.976	0.994
	E score	0.014	0.004	9.794	1	0.002	1.014	1.005	1.023
	N score	0.052	0.005	91.01	1	0	1.054	1.042	1.065
	L score	-0.017	0.005	12.797	1	0	0.983	0.974	0.992
	Lost home or important belongings	0.314	0.098	10.308	1	0.001	1.369	1.13	1.659
	Close family member or friend was injured	0.056	0.108	0.262	1	0.609	1.057	0.855	1.307
	Lost close family member or friend	-0.125	0.138	0.81	1	0.368	0.883	0.673	1.158
	Saw any one dead or injured	0.17	0.102	2.792	1	0.095	1.185	0.971	1.446
	Injured	0.135	0.194	0.489	1	0.484	1.145	0.783	1.674
	Trapped for a longer time	0.334	0.1	11.202	1	0.001	1.396	1.148	1.698
	Felt extreme panic or fear	0.334	0.132	6.439	1	0.011	1.396	1.079	1.807
	Felt unable to escape from the disaster	0.305	0.097	9.858	1	0.002	1.356	1.121	1.64
	Felt one’s own or others' life to have been in danger	0.187	0.106	3.1	1	0.078	1.206	0.979	1.485
	Felt panic of others	0.33	0.146	5.088	1	0.024	1.391	1.044	1.852
	Constant	-3.247	0.549	34.953	1	0	0.039
a Variable(s) entered on step 1: sex, age, ethnic, residence, Removal to another area after earthquake, P score, E score, N score, L score, Lost home or important belongings, Close family member or friend was injured, Lost close family member or friend, Saw any one dead or injured, Injured, Trapped for a longer time, Felt extreme panic or fear, Felt unable to escape from the disaster, Felt one’s …
