# Supplementary material for: Posttraumatic stress disorder symptoms among child survivors of the 2008 Wenchuan earthquake: a comparison between Chinese ethnic Han and Hui groups
Source: PeerJ. 2021 Aug 11;9:e11967. doi: 10.7717/peerj.11967 (PMC8364314; doi:10.7717/peerj.11967)
Supplement: Supplemental Information 2 [file peerj-09-11967-s002.xlsx]

## Sheet: raw data
						JEPQ scores				PsySTART Rapid Triage System scores										UCLA PTSD-RI scores
id	sex	age	ethnic	residence	Remove	Pscore	Escore	Nscore	Lscore	Lost home or important belongings_A10	Close family member or friend was injured_A9	Lost close family member or friend_A8	Saw any one dead or injured_A2	Injured_A11	Trapped for a longer time_A4	Felt extreme panic or fear_A7	Felt unable to escape from the disaster_A6	Felt one’s own or others' life to have been in danger_A5	Felt panic of others_A3	U1	U2	U3	U4	U5	U6	U7	U8	U9	U10	U11	U12	U13	U14	U15	U16	U17	U18	U19	U20
1	1	13	0	0	0	50.9552	27.1154	45.7624	51.0274	1	1	0	1	0	0	0	0	0	1	0	0	0	1	0	0	0	0	0	0	0	0	0	0	0	0	0	0	0	0
2	1	15	0	0	0	79.6853	55.7346	51.2846	56.347	1	1	0	0	0	0	0	0	1	0	0	1	0	0	0	0	0	0	0	0	0	0	0	0	0	0	0	0	0	0
3	1	15	0	0	0	62.2028	55.7346	41.4032	35.7991	0	0	0	1	0	0	0	0	0	0	1	0	0	0	0	0	0	0	0	0	0	0	0	0	0	0	0	0	0	0
5	1	7	0	0	1	69.3793	47.2927	45.7859	40.9946	1	0	0	0	1	1	1	1	1	1	0	0	0	0	2	0	0	0	0	0	0	0	0	0	0	0	0	0	0	0
6	1	8	0	0	1	73.5452	33.8663	57.3537	24.7813	0	1	1	0	1	0	1	1	1	1	0	0	0	0	2	0	0	0	0	0	0	0	0	0	0	0	0	0	0	0
7	1	10	0	0	0	40.2827	36.3056	34.7072	50.3412	0	0	0	0	0	0	1	0	0	0	0	0	0	0	2	0	0	0	0	0	0	0	0	0	0	0	0	0	0	0
8	1	13	0	0	1	39.0149	14.2949	33.8812	55.5936	0	0	0	0	0	0	0	0	0	0	0	0	0	0	2	0	0	0	0	0	0	0	0	0	0	0	0	0	0	0
9	1	15	0	0	0	62.2028	41.5166	57.2134	35.7991	1	0	0	1	0	0	0	0	0	1	1	0	0	0	0	0	1	0	0	0	0	0	0	0	0	0	0	0	0	0
10	0	11	0	0	0	40.3819	17.1111	41.1294	45.5446	0	0	0	0	0	0	1	1	1	1	1	0	0	0	0	0	0	0	0	0	0	1	0	0	1	0	0	0	0	0
11	1	11	0	0	0	37.0486	41.9398	30.9111	66.3728	1	0	0	1	0	0	0	0	0	0	0	0	0	1	2	0	0	0	0	0	0	0	0	0	0	0	0	0	0	0
12	1	12	0	1	1	53.9456	42.1407	57.1519	52.3969	0	0	0	1	0	1	0	0	1	0	1	0	0	0	0	0	0	0	1	0	0	0	0	1	0	0	0	0	0	0
13	1	13	0	1	1	62.8955	62.3718	51.703	28.1963	1	0	1	1	0	0	0	0	0	0	0	0	0	3	0	0	0	0	0	0	0	0	0	0	0	0	0	0	0	0
14	0	9	0	0	1	55	40.6688	63.8444	26.3	1	0	0	1	0	1	1	0	1	1	0	0	1	0	2	0	0	0	0	0	0	0	0	0	0	0	0	0	1	0
15	0	9	0	0	1	81.0417	34.2994	61.6222	42.9667	0	0	0	0	0	0	1	0	0	0	1	1	0	0	2	0	0	0	0	0	0	0	0	0	0	0	0	0	0	0
16	0	12	0	0	1	57.6279	27.5658	36.3557	54.1628	1	0	0	1	0	0	0	0	1	0	0	0	0	1	2	0	0	0	0	0	0	0	0	0	0	0	0	0	2	0
17	0	13	0	0	0	41.7606	42.6329	30.4593	40.7114	0	0	0	0	0	0	0	0	0	0	1	0	0	1	0	0	0	0	1	0	1	0	0	0	0	0	0	0	0	0
18	1	13	0	0	0	39.0149	46.3462	39.8218	37.3288	1	0	0	0	0	0	1	1	1	1	1	1	1	0	0	0	0	0	1	0	0	0	0	0	0	0	0	0	0	0
19	1	14	0	0	0	54.1071	53.4431	48.551	48.2135	0	0	0	1	0	1	1	0	0	1	2	0	0	1	0	0	0	0	0	0	1	0	0	0	0	0	0	0	0	0
20	0	7	0	0	1	69.1321	34.6531	62.9041	42.8295	1	0	0	1	0	0	1	0	1	1	0	0	0	0	2	0	1	0	2	0	0	0	0	0	0	0	0	0	0	0
21	0	11	0	0	1	43.8542	44.2716	32.9158	51.4851	1	0	0	1	0	1	1	1	1	1	0	1	0	0	2	0	1	0	0	0	0	0	0	0	0	0	0	0	1	0
23	1	11	0	0	0	47.4653	62.0067	57.5778	58.8161	0	0	0	0	0	0	1	0	0	1	1	0	1	0	0	0	0	0	1	0	0	0	0	1	0	0	0	0	1	0
24	1	13	0	0	0	33.0448	27.1154	43.7822	48.7443	0	0	0	0	0	0	0	0	1	1	4	0	0	0	0	0	0	0	0	0	0	0	0	0	1	0	0	0	0	0
25	1	14	0	0	0	57.6786	14.521	50.5918	41.6776	0	0	0	1	0	0	1	0	0	0	1	0	0	1	0	0	0	0	0	0	0	1	2	0	0	0	0	0	0	0
26	1	14	0	0	1	61.25	53.4431	46.5102	43.8562	0	0	0	1	0	0	0	0	0	1	0	0	0	1	1	0	0	0	1	0	2	0	0	0	0	0	0	0	0	0
27	1	14	0	0	0	46.9643	56.4371	38.3469	35.1416	1	0	0	1	0	1	1	1	1	1	0	0	0	0	2	0	0	0	0	0	0	0	0	1	1	0	0	0	0	1
28	1	14	0	0	0	43.3929	56.4371	34.2653	54.7495	0	0	0	0	0	0	0	0	1	1	2	0	0	0	0	0	0	0	0	0	0	0	2	0	0	0	0	0	1	0
29	0	12	0	0	0	48.3256	40.7237	40.6941	61.1395	1	0	0	1	0	0	1	0	0	0	4	1	0	0	0	0	0	0	1	0	0	0	0	0	0	0	0	0	0	0
30	0	12	0	0	0	48.3256	44.0132	36.3557	51.8372	1	0	1	1	0	0	1	0	1	0	3	1	0	1	0	0	0	0	0	0	1	0	0	0	0	0	0	0	0	0
31	0	13	0	0	1	41.7606	60.3544	32.547	46.8089	1	0	0	1	0	0	1	0	1	1	4	0	0	0	2	0	0	0	0	0	0	0	0	0	0	0	0	0	0	0
33	1	11	0	0	1	33.5764	51.9732	35.3556	53.7783	0	0	0	1	0	0	1	1	1	1	1	0	0	1	1	0	0	0	0	0	3	0	0	0	0	0	0	0	1	0
34	1	13	0	0	0	44.9851	30.3205	33.8812	35.0457	0	0	0	0	0	0	1	0	0	1	1	0	1	0	2	0	0	1	1	0	0	0	0	0	0	0	0	0	0	0
35	1	14	0	0	0	46.9643	44.4611	36.3061	39.4989	1	0	0	0	0	0	0	0	0	1	1	0	2	0	2	0	0	0	0	1	0	0	0	0	0	0	0	0	0	0
36	0	8	0	0	1	54.7739	30.7471	40.534	52.0113	0	0	1	1	0	1	1	1	1	1	2	1	0	0	2	0	0	0	0	0	0	1	0	1	0	0	0	0	0	0
37	0	9	0	0	0	55	53.4076	50.5111	36.3	0	0	0	0	0	0	1	0	0	1	0	1	1	0	0	0	0	0	0	0	0	2	0	0	2	0	0	0	1	0
38	0	10	0	0	1	83.5909	39.5608	53.9602	58.1995	0	0	0	0	0	0	0	0	0	0	0	1	0	0	2	0	0	1	0	1	1	1	0	0	1	0	0	0	0	0
39	0	10	0	0	0	38.1364	42.9392	40.6858	58.1995	0	0	0	0	0	1	1	0	0	1	1	1	0	1	0	1	0	0	1	0	0	0	0	1	0	1	0	0	1	0
40	0	12	0	1	1	39.0233	44.0132	34.1866	51.8372	0	0	0	1	0	0	1	0	0	1	1	0	0	2	2	0	0	0	1	0	1	0	0	0	0	0	0	0	0	0
41	0	12	0	0	1	43.6744	17.6974	38.5249	51.8372	0	0	0	0	0	0	0	0	0	0	2	1	0	0	2	0	0	0	0	0	0	0	0	0	1	0	0	0	1	0
42	1	7	0	0	1	38.3448	44.8537	50.3417	54.4355	1	0	0	0	1	1	1	1	1	1	0	1	1	1	2	0	0	0	0	0	0	0	0	0	0	1	0	1	0	0
43	1	8	0	0	0	43.4448	41.0263	42.0865	51.0204	0	0	0	0	0	0	0	0	0	0	0	1	1	2	0	1	0	0	0	1	0	0	1	0	0	0	0	0	1	0
44	1	8	0	0	1	46.7893	55.3461	44.631	59.7668	0	1	1	1	0	0	1	0	0	1	3	1	0	1	0	0	0	0	0	1	0	0	0	1	0	0	0	0	0	0
45	1	10	0	0	0	36.7491	14.0833	36.8764	48.209	0	0	0	0	0	0	1	0	1	1	1	0	0	1	2	0	0	0	3	0	0	0	0	0	0	0	0	0	1	0
46	1	11	0	0	1	40.5208	21.8729	35.3556	48.7406	0	0	0	0	0	0	0	0	0	0	0	0	0	0	2	0	0	0	0	4	0	0	0	0	1	0	0	0	0	0
48	1	12	0	0	0	57.3469	39.0826	33.9451	34.3557	1	1	0	1	0	0	0	0	0	0	2	0	1	1	0	0	1	0	2	0	0	0	0	0	0	0	0	0	0	0
49	1	14	0	0	0	46.9643	59.4311	44.4694	59.1068	1	0	0	1	0	1	0	0	1	1	2	1	0	1	0	0	0	0	0	1	1	1	0	1	0	0	0	0	0	0
50	1	15	0	0	0	37.7273	48.6256	33.498	60.9132	0	0	0	1	0	0	0	0	0	1	3	1	1	0	2	0	0	0	0	0	0	0	0	0	0	0	0	0	0	0
52	0	9	0	1	0	65.4167	43.8535	48.2889	26.3	0	0	0	1	0	0	0	1	1	1	0	1	0	1	2	0	1	0	0	0	0	2	0	0	0	0	1	0	0	0
53	0	12	0	0	0	39.0233	40.7237	40.6941	58.814	1	1	0	0	0	1	0	0	1	1	2	1	0	1	0	0	0	1	0	1	1	1	0	0	1	0	0	0	1	0
54	0	12	0	0	0	62.2791	60.4605	36.3557	28.5814	0	1	0	1	0	0	1	0	0	1	2	1	0	0	2	0	0	0	1	0	0	0	0	1	1	0	0	0	0	0
55	0	12	0	0	0	57.6279	37.4342	60.2169	37.8837	0	0	0	1	0	0	1	0	1	1	1	0	0	1	2	0	2	0	1	0	0	1	0	0	0	0	0	0	1	0
56	0	13	0	0	0	52.3239	40.1013	38.81	46.8089	1	0	0	0	0	1	1	1	1	0	1	1	1	0	2	0	0	0	0	0	0	0	1	1	0	0	0	1	0	1
57	0	15	0	0	1	46.0435	54.4444	36.9755	64.3099	1	1	0	1	0	1	1	1	1	1	1	0	0	1	2	0	0	0	1	0	1	1	0	1	0	0	0	0	1	0
58	1	11	0	0	0	37.0486	45.2843	33.1333	68.8917	0	0	0	0	0	0	0	0	0	0	3	0	0	1	0	0	0	0	1	0	1	0	0	1	0	0	0	1	0	1
59	1	12	0	0	1	40.3401	-3.73089	31.8354	44.6649	0	1	1	1	0	1	0	0	0	0	2	0	1	0	2	0	1	0	2	0	0	0	0	0	0	0	0	0	0	0
60	1	12	0	1	0	53.9456	26.8502	50.8228	60.1289	0	0	0	1	0	0	0	1	0	0	1	0	0	2	2	0	0	1	2	0	0	0	0	0	0	0	0	0	0	0
61	1	13	0	1	0	53.9403	52.7564	43.7822	51.0274	1	0	0	1	0	0	1	0	1	1	2	1	0	1	0	0	0	0	0	0	1	2	0	1	0	0	0	0	1	0
62	1	13	0	0	0	44.9851	20.7051	37.8416	41.895	0	0	0	1	0	1	1	0	1	1	0	0	0	1	0	0	0	0	4	0	1	0	0	2	0	0	0	0	0	0
63	1	14	0	0	1	39.8214	59.4311	36.3061	56.9281	0	0	0	1	0	0	0	0	0	1	4	0	0	0	0	0	0	0	0	0	4	0	0	0	0	0	0	0	0	0
64	0	10	0	0	1	42.6818	49.6959	42.8982	48.4672	0	1	0	1	0	0	1	0	1	1	3	1	0	0	2	1	0	0	0	0	0	0	0	0	0	0	0	0	2	0
65	0	11	0	0	0	47.3264	41.8025	43.1828	57.4257	0	0	0	0	0	0	1	1	1	1	0	1	0	1	2	0	0	0	1	2	1	0	0	0	0	1	0	0	2	0
66	0	12	0	1	1	34.3721	44.0132	32.0174	54.1628	0	0	0	1	0	0	1	0	0	1	1	0	0	1	0	0	1	0	1	0	3	1	0	1	0	0	0	0	0	0
67	0	12	0	0	1	48.3256	37.4342	36.3557	61.1395	1	0	0	1	0	0	1	1	1	1	3	0	1	1	2	0	0	0	0	0	0	1	0	0	0	0	0	0	0	1
68	0	13	0	0	1	41.7606	60.3544	34.6347	52.9065	0	0	0	1	0	0	1	0	1	1	2	0	0	1	0	0	2	0	1	0	1	1	1	0	0	0	0	0	1	0
69	0	14	0	0	0	41.4768	58.7097	46.3673	59.0931	1	1	1	1	0	0	1	1	1	1	2	0	1	2	0	0	0	0	1	0	2	0	0	0	0	1	0	0	0	0
70	0	15	0	0	0	46.0435	29.7531	42.2203	59.4673	0	0	0	1	0	1	1	0	1	0	1	0	2	0	2	0	0	0	0	1	0	0	1	0	1	0	0	0	1	0
71	1	8	0	0	1	43.4448	50.5728	52.2646	56.8513	1	0	0	1	0	0	0	0	0	1	0	0	0	0	0	0	2	0	2	0	0	0	0	1	2	2	0	0	0	0
72	1	10	0	0	0	57.9505	61.3056	52.0607	46.0768	0	0	0	1	0	1	1	0	1	1	1	2	0	0	2	0	0	0	1	0	2	0	0	0	0	0	0	0	1	0
73	1	10	0	0	1	47.3498	41.8611	49.8915	46.0768	1	0	0	1	0	1	1	0	1	1	1	2	0	1	2	0	0	0	0	1	0	0	0	1	0	1	0	0	0	0
74	1	10	0	0	1	82.6855	41.8611	58.5683	58.8699	0	0	0	0	0	1	1	0	1	1	2	1	0	0	2	0	0	0	0	0	0	0	1	1	2	0	0	0	0	0
75	1	12	0	0	1	33.5374	39.0826	55.0422	65.2835	0	0	0	0	0	1	1	1	1	1	1	1	2	0	0	0	0	0	1	0	0	0	1	0	0	0	0	0	2	1
76	1	12	0	0	0	33.5374	39.0826	42.384	49.8196	1	0	0	1	0	0	0	0	1	1	2	1	1	0	0	1	0	0	0	1	0	0	0	1	1	0	0	0	1	0
77	1	13	0	0	0	44.9851	17.5	41.802	39.6119	1	0	0	0	0	0	1	0	1	1	1	0	1	1	2	0	0	0	1	0	1	0	0	1	0	0	1	0	1	0
78	1	14	0	0	0	50.5357	59.4311	46.5102	59.1068	0	1	0	0	0	0	0	0	1	1	1	1	0	1	2	0	0	0	0	0	1	1	0	0	1	0	1	0	0	0
79	1	15	0	0	0	51.7133	50.9953	33.498	51.7808	1	1	0	1	1	1	0	0	1	1	1	0	0	1	0	0	2	1	0	1	1	0	1	0	2	0	0	0	0	0
80	1	15	0	0	1	41.2238	46.2559	35.4743	58.6301	0	0	1	0	0	0	1	0	1	1	1	0	0	0	2	0	2	0	1	0	3	0	0	0	0	0	0	0	0	0
81	0	8	0	0	1	69.8492	36.4943	47.8155	52.0113	0	0	0	0	0	0	1	0	1	1	2	1	1	0	2	0	0	0	0	0	1	1	0	0	1	0	0	0	1	0
82	0	9	0	0	1	55	18.3758	74.9556	29.6333	1	0	0	0	0	0	1	0	1	1	2	0	1	0	2	0	0	0	1	0	1	0	0	1	0	1	0	0	1	0
83	0	10	0	0	0	42.6818	36.1824	51.7478	38.7348	0	0	0	0	0	1	1	1	1	1	1	0	0	1	2	1	2	1	0	0	0	1	0	0	1	0	0	0	1	0
84	0	11	0	0	0	47.3264	44.2716	51.3963	55.4455	1	0	0	1	0	0	1	0	0	0	1	0	2	2	0	0	0	1	2	0	1	0	0	0	1	0	0	0	0	0
85	0	11	0	0	0	50.7986	61.5556	41.1294	57.4257	1	0	0	1	0	0	1	1	1	1	1	2	1	0	2	1	0	0	1	0	0	0	0	1	0	0	0	0	1	0
86	0	12	0	0	1	43.6744	44.0132	47.2017	63.4651	1	0	0	0	0	1	1	0	0	0	1	1	2	1	0	0	0	0	1	0	1	1	1	1	0	0	0	0	0	0
87	0	12	0	0	0	39.0233	27.5658	42.8633	49.5116	0	1	0	1	0	0	1	0	1	1	1	2	0	1	0	0	1	0	0	1	1	1	0	1	1	0	1	0	1	0
88	0	13	0	0	0	38.2394	40.1013	36.7223	50.874	1	0	0	0	0	0	1	0	0	1	4	1	1	0	1	0	0	0	0	0	1	1	1	0	0	0	0	0	0	0
89	0	13	0	0	1	41.7606	55.2911	47.1608	56.9715	0	1	0	1	0	1	1	1	1	1	2	1	0	0	2	0	0	0	1	0	0	1	0	0	0	0	0	0	3	0
90	0	14	0	0	1	37.2574	42.5806	50.449	54.1912	0	0	0	1	0	0	0	0	1	1	3	0	0	0	2	0	0	0	0	0	0	1	3	0	1	0	0	0	0	0
91	0	14	0	0	1	58.3544	47.1889	56.5714	44.3873	1	1	0	1	0	0	1	0	1	1	0	0	0	2	2	0	0	0	0	0	0	1	0	3	2	0	0	0	2	0
93	1	9	0	1	1	40.3385	21.6864	40.4565	55.7752	1	0	0	1	0	0	0	1	0	1	0	1	0	0	2	1	0	0	1	0	0	0	0	1	0	0	1	0	2	1
95	1	13	0	0	1	42	52.7564	43.7822	53.3105	0	0	0	0	0	1	1	1	1	1	1	1	1	1	2	0	0	0	1	1	0	1	1	0	0	0	0	0	0	0
96	1	13	0	0	0	56.9254	23.9103	47.7426	46.4612	1	0	0	0	0	1	0	0	0	0	1	0	0	0	2	0	2	0	0	2	0	0	0	0	3	0	0	0	0	0
100	1	14	0	0	0	46.9643	44.4611	46.5102	48.2135	0	0	1	0	0	0	1	0	1	1	3	1	0	1	0	0	0	0	0	1	4	0	0	1	0	0	0	0	0	0
101	1	14	0	0	0	43.3929	23.503	34.2653	50.3922	1	0	0	1	0	0	1	1	1	1	2	0	1	0	1	1	0	1	0	0	1	0	1	0	0	0	0	0	2	0
102	1	15	0	0	0	62.2028	39.1469	51.2846	40.3653	1	0	0	0	0	1	1	0	0	1	3	1	2	0	2	0	0	1	0	0	0	0	0	0	1	0	0	0	0	0
103	0	8	0	1	0	49.7487	47.9885	45.3883	54.8442	0	0	0	0	0	0	0	0	0	0	2	1	0	0	2	2	0	0	1	0	1	0	0	0	0	0	2	0	0	0
104	0	8	0	1	1	49.7487	53.7356	50.2427	57.6771	0	0	0	0	0	1	1	1	0	1	0	2	3	0	3	0	0	0	0	0	1	0	0	0	1	1	0	0	0	0
105	0	9	0	0	0	65.4167	56.5924	52.7333	46.3	0	0	1	1	0	0	1	0	0	1	2	2	3	1	0	0	0	1	1	1	1	0	0	0	0	0	0	0	0	0
106	0	10	0	0	1	42.6818	42.9392	42.8982	60.6326	1	0	0	0	0	0	1	0	0	1	1	2	2	1	0	0	0	0	0	1	0	0	0	2	1	0	1	0	1	0
107	0	11	0	0	0	43.8542	51.679	43.1828	49.505	0	0	0	0	0	0	1	0	1	1	3	2	1	1	2	0	0	0	0	1	1	0	1	0	0	0	0	0	1	0
108	0	13	0	0	1	41.7606	50.2278	34.6347	61.0366	1	1	0	1	0	0	0	0	0	1	2	2	0	0	0	0	0	0	2	0	1	1	0	0	0	0	0	0	3	0
109	0	13	0	1	0	59.3662	37.5696	53.4238	42.7439	1	1	0	0	0	0	0	0	1	1	3	3	0	1	2	0	0	0	1	0	0	1	0	0	0	0	0	0	0	0
110	0	13	0	0	0	41.7606	27.443	30.4593	50.874	0	0	0	0	0	0	0	0	1	1	2	1	0	1	0	0	1	1	0	0	1	0	1	0	2	1	0	0	0	0
111	0	14	0	0	0	41.4768	40.2765	42.2857	41.9363	0	0	0	0	0	1	1	0	1	1	4	0	0	1	2	0	0	0	0	2	0	0	0	0	0	1	0	0	0	1
112	0	15	0	0	1	76.4783	60.6173	57.9545	49.7821	0	0	0	1	0	0	0	1	1	0	0	0	0	1	2	0	0	0	0	0	4	0	0	0	4	0	0	0	0	0
113	1	7	0	0	1	69.3793	42.4146	52.6196	57.1237	0	1	0	1	0	1	1	1	1	1	0	1	0	0	2	0	0	0	0	0	1	1	0	0	0	0	2	0	1	3
115	1	10	0	0	1	43.8163	41.8611	52.0607	58.8699	1	0	0	1	0	0	1	0	1	1	2	1	0	1	2	1	0	0	0	1	1	2	0	0	1	0	0	0	0	0
116	1	12	0	0	0	43.7415	36.0245	42.384	34.3557	1	0	0	1	0	0	1	0	1	1	3	1	0	0	2	0	1	0	1	0	1	1	1	0	0	0	0	0	0	0
117	1	12	0	0	0	36.9388	45.1988	52.9325	47.2423	0	0	0	1	0	0	1	1	1	1	0	1	0	0	0	0	1	1	0	0	1	0	0	3	1	0	1	0	2	0
118	1	13	0	1	1	39.0149	33.5256	33.8812	53.3105	1	0	0	1	0	1	0	0	1	1	4	1	0	0	0	0	0	0	0	0	4	0	0	0	0	0	0	0	2	0
119	1	13	0	0	0	39.0149	39.9359	37.8416	51.0274	0	0	0	0	0	0	1	0	1	1	2	1	1	2	2	0	0	0	0	1	0	0	0	1	1	0	0	0	1	0
120	1	13	0	0	1	39.0149	52.7564	33.8812	51.0274	0	1	0	1	0	0	0	0	1	1	3	1	1	0	2	0	0	0	0	0	0	1	0	3	0	0	0	0	0	0
121	1	13	0	0	0	44.9851	33.5256	43.7822	60.1598	1	0	0	0	0	0	1	0	0	1	2	0	1	1	2	0	0	0	0	0	1	0	1	1	1	0	1	0	0	0
122	1	14	0	0	0	39.8214	29.491	36.3061	63.4641	0	0	0	1	0	0	1	0	1	0	2	1	0	1	0	1	0	0	2	0	0	1	1	1	0	0	0	0	1	1
123	1	14	0	0	0	46.9643	41.4671	46.5102	52.5708	1	1	0	1	0	0	1	0	1	1	2	1	0	1	2	2	0	0	1	0	1	0	1	0	0	0	0	0	1	0
124	1	14	0	0	0	46.9643	44.4611	36.3061	50.3922	0	0	1	1	0	0	0	0	1	1	4	0	0	0	2	2	0	0	0	0	0	0	0	0	3	0	0	0	0	0
125	1	14	0	0	0	39.8214	44.4611	38.3469	56.9281	1	0	0	0	0	0	0	0	1	1	1	0	0	2	0	0	0	0	1	0	2	0	0	1	1	1	2	0	1	0
126	1	15	0	0	0	51.7133	53.3649	61.166	24.3836	0	0	0	1	0	0	0	0	1	1	1	0	0	2	2	0	0	0	0	0	0	0	3	0	3	0	0	0	0	0
127	1	15	0	0	1	37.7273	27.2986	37.4506	47.2146	1	0	0	1	0	0	1	1	1	1	1	0	0	1	2	0	1	0	1	0	1	0	2	1	1	0	0	0	0	0
128	0	8	0	0	1	59.799	27.8736	38.1068	40.6799	1	0	0	1	0	1	1	0	0	0	1	2	0	1	2	0	0	1	1	0	0	1	1	1	0	0	0	0	2	0
129	0	9	0	0	0	44.5833	56.5924	43.8444	39.6333	0	0	0	1	0	0	1	0	0	1	1	2	2	0	1	2	0	0	0	0	0	0	1	1	0	1	0	0	1	0
130	0	9	0	0	0	49.7917	43.8535	52.7333	22.9667	0	0	0	0	0	1	1	1	1	1	2	3	1	0	0	0	0	0	1	0	0	1	0	1	1	1	0	0	1	0
131	0	9	0	0	0	70.625	27.9299	46.0667	29.6333	0	0	0	0	0	0	1	1	0	1	3	0	1	0	2	1	0	0	2	1	0	1	1	0	0	0	0	0	0	0
132	0	10	0	0	0	51.7727	39.5608	42.8982	41.1679	0	1	1	0	0	0	0	1	0	1	3	2	3	0	1	1	0	0	1	0	1	0	0	0	0	0	0	0	0	0
133	0	10	0	0	1	38.1364	46.3176	49.5354	55.7664	1	0	0	1	0	1	1	0	0	1	3	1	0	0	1	0	0	0	1	1	0	1	1	1	1	1	0	0	0	0
134	0	12	0	0	1	48.3256	34.1447	36.3557	44.8605	1	0	0	0	0	0	0	1	0	0	2	1	1	1	2	1	0	0	1	0	1	1	1	0	0	0	0	0	1	0
135	0	12	0	0	0	43.6744	47.3026	36.3557	54.1628	0	0	0	1	0	0	0	0	1	0	1	2	0	2	2	0	2	0	0	1	0	0	0	2	0	0	0	0	0	0
136	0	13	0	0	0	38.2394	60.3544	30.4593	63.0691	0	0	0	0	0	0	1	1	1	1	0	1	2	0	2	0	1	0	0	0	2	0	0	0	0	0	1	1	2	1
137	0	13	0	0	1	41.7606	50.2278	45.0731	48.8415	0	0	0	1	0	1	1	0	1	1	2	1	2	2	1	1	0	0	1	1	2	0	0	0	0	0	0	0	0	0
138	0	14	0	0	0	45.6962	31.0599	46.3673	49.2892	1	0	0	1	0	0	0	0	1	1	0	0	1	0	2	0	0	1	1	1	0	0	1	0	3	0	1	0	1	0
139	0	14	0	0	1	45.6962	44.8848	58.6122	51.7402	1	0	0	1	0	0	1	0	1	1	1	0	1	2	1	1	0	0	1	2	0	0	0	0	3	0	0	0	2	0
140	0	14	0	0	0	49.9156	47.1889	34.1224	59.0931	1	0	0	1	0	0	1	0	0	1	1	1	0	0	2	0	1	0	2	1	0	0	0	1	1	0	0	0	2	0
141	0	15	0	0	0	41.6957	48.2716	36.9755	61.8886	1	0	0	1	0	0	1	0	1	1	2	0	0	2	2	0	1	0	0	0	1	1	1	1	1	0	0	0	1	0
142	1	8	0	0	1	43.4448	48.1862	42.0865	59.7668	1	0	0	1	0	0	1	0	1	1	2	0	0	2	2	0	0	0	0	0	0	0	0	2	0	4	0	0	1	0
143	1	9	0	0	1	52.6462	36.4793	33.9348	49.9612	0	0	0	0	0	0	1	0	1	1	1	2	1	1	2	0	2	0	1	0	0	0	0	1	0	1	0	0	1	0
144	1	10	0	0	1	40.2827	55.75	34.7072	61.0021	1	0	0	0	0	0	1	1	0	1	1	1	2	0	2	0	0	0	3	0	0	0	1	1	1	0	0	0	0	0
145	1	11	0	0	1	57.8819	51.9732	50.9111	58.8161	0	0	0	0	0	1	1	0	1	1	0	0	0	0	2	0	0	2	2	2	2	2	2	0	0	0	0	0	0	0
146	1	11	0	0	0	37.0486	38.5953	39.8	51.2594	0	0	0	1	0	0	1	0	1	1	2	1	1	0	1	2	0	0	2	0	2	0	0	0	0	0	0	0	1	0
147	1	12	0	0	1	40.3401	42.1407	38.1646	65.2835	1	0	0	0	1	0	0	1	0	1	0	0	0	1	2	0	0	0	0	1	1	2	1	3	1	1	0	0	0	0
148	1	13	0	0	0	44.9851	43.141	57.6436	39.6119	0	0	0	1	0	0	1	0	0	1	3	0	0	1	3	0	0	0	0	0	0	0	1	2	1	1	0	0	0	0
149	1	13	0	0	0	65.8806	39.9359	47.7426	30.4795	1	0	0	1	0	1	0	0	1	1	1	0	0	2	0	0	1	3	0	0	2	1	0	1	1	0	0	0	0	0
150	1	13	0	0	1	42	43.141	39.8218	57.8767	0	0	0	1	0	0	0	0	1	1	3	1	1	1	0	0	1	1	1	1	0	0	0	1	1	0	0	0	0	0
151	1	13	0	0	0	50.9552	36.7308	43.7822	37.3288	0	0	0	0	0	0	0	0	1	1	1	2	1	1	2	0	0	0	1	0	0	0	1	1	1	0	0	0	1	1
152	1	13	0	0	0	42	46.3462	45.7624	55.5936	0	0	0	0	0	0	1	1	1	1	2	1	1	1	2	1	1	0	0	0	0	0	0	0	1	1	1	0	0	0
153	1	13	0	0	1	36.0299	33.5256	43.7822	55.5936	1	0	0	1	0	0	1	0	0	0	2	1	2	1	0	0	0	1	0	0	1	0	0	1	1	0	1	0	2	0
154	1	14	0	0	1	61.25	47.4551	54.6735	30.7843	1	1	0	0	0	0	1	0	1	1	0	1	0	1	2	0	0	0	1	0	0	0	3	0	4	0	0	0	1	0
155	1	14	0	0	0	43.3929	44.4611	46.5102	54.7495	1	0	0	0	0	0	1	0	1	1	3	1	1	1	0	0	0	0	1	0	1	1	1	1	1	0	0	0	0	0
156	1	14	0	0	1	39.8214	44.4611	38.3469	39.4989	1	0	0	1	0	0	1	0	1	1	3	0	0	1	0	0	0	0	0	1	1	0	0	1	2	2	0	0	2	1
157	1	14	0	0	1	50.5357	56.4371	52.6327	52.5708	1	1	1	1	0	1	0	0	0	1	1	0	0	2	2	2	0	0	2	0	1	1	1	0	0	0	0	0	0	0
158	1	15	0	0	0	44.7203	50.9953	39.4269	40.3653	1	0	0	0	0	0	0	0	1	1	2	0	1	2	0	0	2	1	0	1	2	0	0	0	2	0	0	0	0	0
159	1	15	0	0	0	55.2098	58.1043	55.2372	42.6484	0	1	0	0	0	0	1	0	0	1	3	2	1	2	2	0	0	0	1	0	0	0	0	1	0	0	0	0	0	0
160	1	15	0	1	0	48.2168	50.9953	59.1897	54.0639	1	1	1	1	0	0	1	0	1	1	2	1	0	1	2	0	1	0	1	0	1	0	1	0	1	1	0	0	1	0
161	1	15	0	0	0	55.2098	32.0379	49.3083	38.0822	1	0	0	1	0	0	0	0	1	1	2	0	1	1	2	0	0	0	0	0	2	0	1	2	1	0	0	0	0	0
162	1	15	0	0	0	51.7133	43.8863	49.3083	38.0822	0	0	0	0	0	0	0	0	0	1	3	1	1	0	2	1	0	0	1	0	0	0	0	1	0	0	0	0	1	1
163	0	7	0	0	0	76.6792	22.4082	65.6438	31.2016	1	0	0	0	0	1	1	1	1	0	0	1	2	1	2	0	0	0	0	4	0	2	0	0	0	1	0	0	1	0
165	0	11	0	0	1	43.8542	46.7407	45.2361	61.3861	1	0	0	0	0	0	0	1	0	1	1	1	0	1	0	1	0	1	1	2	1	1	1	2	0	0	1	0	1	0
166	0	13	0	0	1	41.7606	14.7848	53.4238	36.6463	1	0	0	1	0	0	0	0	0	1	1	1	0	2	2	0	0	0	0	0	2	1	1	1	2	0	0	0	1	0
167	0	13	0	0	0	45.2817	55.2911	42.9854	50.874	0	0	0	1	0	0	0	0	0	0	2	2	1	1	2	1	1	0	1	1	1	0	0	0	1	0	0	0	1	0
168	0	13	0	0	1	45.2817	35.038	40.8977	42.7439	0	0	0	0	0	0	0	0	0	1	1	0	2	1	2	2	1	0	0	0	1	1	0	1	1	0	0	0	0	0
169	0	13	0	0	0	41.7606	60.3544	42.9854	54.939	1	1	0	1	0	0	0	0	1	1	3	1	1	2	2	2	0	0	0	0	1	1	0	0	0	0	0	0	0	0
170	0	13	0	0	1	41.7606	50.2278	36.7223	44.7764	0	1	0	0	0	0	0	0	0	0	4	2	1	2	0	0	0	0	1	0	1	0	0	0	1	1	0	0	1	0
171	0	14	0	0	0	45.6962	65.6221	34.1224	49.2892	0	1	0	1	0	0	0	0	1	1	2	0	1	1	2	0	0	0	0	0	4	1	0	1	0	0	0	0	2	0
172	0	15	0	0	0	46.0435	60.6173	59.7028	49.7821	0	0	0	1	0	0	1	0	1	1	1	0	0	3	0	0	2	0	1	0	2	1	1	0	0	1	0	0	4	0
173	0	15	0	0	1	41.6957	48.2716	35.2273	59.4673	1	1	0	1	0	0	1	0	1	1	2	1	0	0	2	0	1	0	2	1	0	0	0	1	1	1	0	0	1	0
174	0	15	0	0	0	54.7391	66.7901	42.2203	37.6755	1	0	0	0	0	0	1	0	1	1	2	3	2	1	2	1	0	0	0	1	1	0	0	0	1	0	0	0	0	0
176	1	7	0	0	1	55.5862	49.7317	41.2301	57.1237	0	0	1	0	1	0	1	1	1	1	1	2	0	2	2	0	1	2	0	0	0	0	2	0	0	0	1	0	1	0
177	1	9	0	1	0	37.2615	39.4379	40.4565	55.7752	0	1	0	1	0	1	1	1	1	1	1	0	2	1	2	0	1	0	0	0	0	1	1	0	0	0	2	0	3	0
178	1	9	0	0	0	43.4154	27.6036	53.5	61.5891	0	0	0	0	0	0	1	1	0	0	1	0	2	3	2	0	0	0	2	0	0	1	0	0	1	0	0	0	1	1
179	1	10	0	0	0	57.9505	52.9722	47.7223	58.8699	1	0	0	1	0	1	1	0	1	1	1	1	0	0	0	0	1	0	1	2	1	1	1	2	1	0	1	0	1	0
181	1	11	0	0	1	64.8264	31.9064	48.6889	66.3728	0	0	0	1	0	1	1	0	1	1	3	1	0	1	2	0	0	0	0	1	1	2	1	1	1	0	0	0	1	0
182	1	11	0	0	1	37.0486	48.6288	39.8	63.8539	0	0	0	1	0	0	1	0	1	0	1	0	2	0	2	2	0	0	1	3	1	0	0	1	0	0	0	0	1	0
183	1	11	0	1	0	37.0486	45.2843	42.0222	58.8161	1	0	1	1	0	1	1	1	1	1	2	1	1	0	2	0	0	0	4	0	0	0	0	1	1	0	0	0	1	0
184	1	11	0	0	0	40.5208	15.1839	44.2444	63.8539	0	0	1	1	0	0	1	0	1	1	2	2	1	1	1	0	1	1	1	1	1	0	0	0	1	1	0	0	0	0
186	1	11	0	0	0	47.4653	51.9732	35.3556	61.335	0	0	0	0	0	0	1	0	0	1	2	0	0	0	2	0	0	2	0	4	0	1	0	0	0	0	0	0	2	0
187	1	11	0	0	0	43.9931	31.9064	37.5778	66.3728	1	0	0	0	0	1	1	1	1	1	1	1	1	1	2	0	1	0	1	1	1	1	1	1	0	0	1	0	1	0
188	1	12	0	0	0	47.1429	23.792	55.0422	44.6649	0	0	0	0	0	0	0	0	0	1	1	2	0	0	2	1	0	1	3	0	0	0	0	0	0	0	0	0	3	0
189	1	12	0	0	0	53.9456	48.2569	59.2616	52.3969	0	0	0	0	0	0	0	0	1	0	3	2	0	2	2	0	2	1	0	0	0	0	0	0	0	1	0	0	1	0
190	1	12	0	1	1	43.7415	39.0826	42.384	49.8196	0	0	0	1	0	0	1	1	1	1	0	1	0	1	2	2	1	0	0	2	0	1	0	1	0	1	0	1	0	0
191	1	13	0	0	0	44.9851	33.5256	51.703	46.4612	0	0	0	0	0	0	0	1	0	1	1	1	1	0	2	1	0	0	1	1	1	1	0	1	1	0	0	0	1	1
192	1	13	0	1	0	42	36.7308	45.7624	35.0457	0	0	0	0	0	0	1	1	1	1	2	1	1	0	0	1	0	1	1	1	2	1	0	1	1	1	0	0	0	0
193	1	13	0	0	0	65.8806	52.7564	63.5842	51.0274	0	0	0	1	0	0	0	0	0	1	1	0	0	1	2	0	0	0	0	0	1	0	0	0	4	4	0	0	0	0
194	1	13	0	0	0	42	11.0897	43.7822	46.4612	0	0	0	0	0	1	0	1	0	0	0	0	0	0	2	0	0	3	0	3	4	0	0	0	0	3	0	0	0	1
195	1	13	0	0	0	65.8806	59.1667	49.7228	48.7443	1	1	0	1	0	0	1	0	1	1	3	1	0	0	2	0	0	0	1	0	3	0	0	0	0	3	0	0	0	0
196	1	13	0	0	0	39.0149	49.5513	43.7822	57.8767	0	1	0	1	0	1	0	0	1	1	1	2	1	0	2	0	0	0	2	1	1	0	1	2	1	0	0	0	0	0
197	1	14	0	0	0	43.3929	44.4611	38.3469	41.6776	1	0	0	1	0	1	0	0	1	1	2	0	0	1	0	0	0	0	2	0	3	1	1	1	0	1	0	0	0	1
198	1	14	0	0	0	43.3929	53.4431	44.4694	41.6776	0	0	0	1	0	1	1	0	1	1	1	1	2	1	2	0	0	1	0	0	1	1	1	0	2	0	0	0	1	0
200	1	15	0	0	1	62.2028	36.7773	51.2846	44.9315	1	0	0	1	0	0	1	0	0	1	2	1	1	1	2	1	0	0	1	2	2	1	0	0	0	0	1	0	0	0
201	1	15	0	0	0	34.2308	32.0379	49.3083	51.7808	1	0	1	1	0	0	1	0	1	1	1	2	0	1	2	0	2	0	0	3	2	0	0	0	2	0	0	0	0	0
202	1	15	0	0	1	44.7203	60.4739	59.1897	38.0822	0	1	0	0	0	0	1	0	0	0	2	0	0	2	2	1	1	0	0	2	2	0	1	0	1	0	0	1	0	0
203	0	8	0	1	1	44.7236	42.2414	55.0971	46.3456	0	0	0	0	0	0	0	0	0	0	2	1	0	1	0	1	0	0	2	1	2	1	0	1	2	1	0	0	1	0
204	0	8	0	1	1	44.7236	45.1149	55.0971	54.8442	0	0	0	1	0	1	1	1	0	1	0	1	2	3	0	0	2	3	0	0	1	0	0	0	0	0	2	0	0	0
205	0	9	0	0	0	55	43.8535	50.5111	39.6333	0	0	1	1	1	0	1	0	0	0	2	1	3	1	2	1	0	0	1	0	1	1	0	0	0	1	0	0	0	0
206	0	9	0	0	0	117.5	53.4076	70.5111	32.9667	0	0	0	1	0	0	1	1	1	1	1	2	0	1	2	1	0	1	0	0	1	0	1	0	1	0	1	0	3	0
207	0	9	0	0	0	44.5833	31.1146	37.1778	56.3	1	0	0	0	0	0	1	0	0	1	1	2	0	1	2	0	0	2	1	1	2	1	0	1	0	0	1	0	1	0
208	0	10	0	0	1	56.3182	49.6959	47.323	58.1995	0	0	0	0	0	1	1	0	0	0	4	0	0	1	2	0	0	1	0	0	1	0	0	0	4	0	0	0	2	0
209	0	10	0	0	0	42.6818	36.1824	40.6858	53.3333	1	1	0	1	0	0	1	0	1	1	2	1	2	1	2	1	0	0	0	0	1	0	0	2	2	0	0	0	1	0
210	0	11	0	0	1	43.8542	29.4568	49.3429	45.5446	1	0	0	0	0	0	1	0	1	1	0	2	0	1	1	0	2	0	1	1	0	2	2	1	0	0	0	0	2	0
211	0	11	0	0	0	40.3819	41.8025	53.4497	43.5644	0	1	0	0	0	0	1	0	1	0	1	2	1	2	0	0	0	0	1	0	1	2	0	0	3	1	0	0	2	0
212	0	12	0	1	1	39.0233	57.1711	29.8482	51.8372	0	0	0	1	0	0	1	0	1	1	2	3	2	0	2	0	0	0	1	0	0	1	0	0	0	0	1	0	2	0
213	0	12	0	0	1	52.9767	34.1447	68.8937	56.4884	0	0	0	1	0	0	1	1	1	1	1	2	3	0	2	0	1	0	0	0	1	1	0	1	0	0	1	1	0	0
214	0	12	0	0	0	34.3721	37.4342	29.8482	65.7907	0	1	1	0	0	0	0	0	0	0	0	0	1	0	2	0	0	0	2	0	4	0	0	1	0	1	0	0	3	0
215	0	12	0	0	1	80.8837	47.3026	49.3709	42.5349	1	0	0	0	0	0	0	0	1	0	2	0	1	2	2	1	0	0	0	1	0	1	1	1	0	0	0	2	2	0
216	0	13	0	0	0	48.8028	57.8228	38.81	54.939	1	0	0	1	0	1	1	1	1	1	2	1	0	1	2	0	0	0	0	1	0	0	0	2	0	3	1	0	2	0
218	0	13	0	0	0	52.3239	47.6962	57.5992	48.8415	0	0	0	1	0	0	0	0	0	1	4	0	0	1	2	1	1	0	1	1	0	1	0	1	1	0	0	0	0	0
219	0	13	0	0	0	48.8028	52.7595	45.0731	50.874	0	1	0	1	1	0	1	0	0	1	2	1	1	1	2	0	0	0	0	0	1	1	0	1	1	0	0	0	4	0
220	0	13	0	0	0	80.493	42.6329	45.0731	34.6138	0	0	0	1	0	0	1	1	0	1	1	2	3	0	2	0	0	2	0	0	0	0	0	0	0	1	1	1	1	1
221	0	13	0	0	0	45.2817	60.3544	53.4238	59.0041	1	1	0	1	0	1	1	0	1	1	2	1	1	2	1	1	0	0	0	1	1	1	0	0	2	0	1	0	3	0
222	0	13	0	1	0	38.2394	40.1013	53.4238	38.6789	0	0	0	0	0	1	0	0	0	1	4	0	1	2	2	0	0	0	0	0	1	2	0	1	1	0	0	0	0	0
223	0	13	0	0	0	62.8873	40.1013	42.9854	42.7439	0	0	0	1	0	1	1	1	1	1	1	2	0	2	2	0	2	0	1	0	0	3	0	1	0	0	0	0	0	0
224	0	14	0	0	0	41.4768	56.4055	36.1633	49.2892	1	0	0	0	0	0	0	0	0	1	2	1	0	1	2	0	1	0	1	0	2	1	0	0	1	1	0	0	2	0
225	0	14	0	1	0	75.2321	58.7097	62.6939	49.2892	1	0	0	1	0	0	0	0	0	1	2	1	1	0	2	1	1	0	1	0	3	2	0	0	0	0	0	0	0	0
226	0	15	0	0	0	67.7826	60.6173	59.7028	40.0969	0	0	0	1	0	0	0	0	0	1	1	1	1	4	2	0	0	0	0	1	0	0	0	0	0	0	0	0	0	4
227	0	15	0	0	0	41.6957	54.4444	38.7238	47.3608	1	0	0	1	0	0	0	0	0	0	2	1	0	2	0	0	1	0	1	1	3	1	1	1	0	1	0	0	1	0
228	0	15	0	0	0	41.6957	51.358	42.2203	64.3099	1	0	0	1	0	0	0	0	0	0	2	1	1	2	2	1	0	0	1	0	1	1	1	0	1	0	0	0	1	0
231	1	8	0	0	0	36.7559	60.1193	44.631	56.8513	1	0	0	1	0	1	0	0	0	1	3	2	0	2	0	0	0	0	1	1	1	1	0	2	2	0	0	0	0	0
232	1	9	0	0	0	58.8	42.3964	60.0217	42.2093	1	0	0	1	0	0	1	1	1	1	1	2	0	0	2	0	0	1	0	0	1	0	0	2	0	0	2	2	1	2
233	1	9	0	0	0	58.8	33.5207	40.4565	42.2093	1	0	0	1	0	1	1	0	1	1	1	1	1	1	1	0	1	1	1	1	1	1	1	1	1	0	1	0	1	0
234	1	10	0	0	0	36.7491	52.9722	36.8764	63.1343	1	0	0	0	0	1	1	0	0	1	2	1	2	1	1	1	0	1	0	0	0	0	1	1	1	1	1	0	0	0
235	1	10	0	0	1	57.9505	36.3056	54.2299	46.0768	1	0	0	0	0	0	1	0	0	1	2	2	1	1	0	1	1	0	1	0	1	0	1	1	1	1	0	0	1	0
236	1	10	0	0	1	61.4841	41.8611	49.8915	63.1343	1	0	0	0	0	1	1	0	1	0	1	3	0	0	2	0	1	0	0	0	0	2	0	2	2	0	0	0	1	0
237	1	11	0	1	1	57.8819	21.8729	57.5778	36.1461	0	0	0	1	0	0	0	0	1	1	0	0	1	0	2	1	0	0	0	0	1	1	1	0	1	0	1	2	3	0
238	1	11	0	0	1	43.9931	48.6288	35.3556	63.8539	0	0	0	0	0	0	0	0	0	1	1	2	0	0	0	0	1	0	1	1	3	2	0	0	2	2	0	0	0	0
240	1	12	0	0	1	33.5374	36.0245	36.0549	57.5515	1	0	0	0	0	0	1	1	1	1	2	1	0	0	2	0	0	0	1	1	2	1	0	1	1	1	0	0	2	0
244	1	13	0	1	1	53.9403	46.3462	43.7822	46.4612	1	0	0	1	0	0	1	0	1	1	4	2	2	2	0	0	0	0	0	0	1	2	0	1	0	0	0	0	1	0
245	1	13	0	0	0	44.9851	49.5513	37.8416	57.8767	1	0	0	1	0	0	0	1	0	0	3	1	1	1	0	1	0	0	1	1	1	1	1	2	1	0	0	0	1	0
246	1	13	0	0	0	42	55.9615	39.8218	64.726	1	0	0	1	0	0	0	0	1	1	4	0	2	0	2	1	1	0	0	0	1	0	0	2	0	0	0	0	1	0
247	1	14	0	0	1	64.8214	47.4551	46.5102	41.6776	1	0	0	1	0	1	1	1	1	1	2	1	0	4	2	0	0	0	0	0	2	0	0	0	1	0	2	0	2	0
248	1	14	0	0	0	46.9643	50.4491	48.551	41.6776	1	1	0	1	0	0	1	0	1	1	3	1	1	2	1	1	0	0	0	1	2	1	0	0	2	0	0	0	0	0
249	1	14	0	0	1	50.5357	47.4551	56.7143	50.3922	1	0	0	1	0	0	0	0	0	1	2	0	1	1	0	0	1	1	1	1	1	0	2	1	3	0	0	0	0	0
251	1	14	0	0	0	50.5357	32.485	40.3878	39.4989	1	1	0	1	0	1	0	1	0	1	2	1	2	1	2	0	1	0	0	2	1	0	0	0	1	2	0	0	1	0
252	1	14	0	0	0	46.9643	32.485	46.5102	48.2135	0	0	0	1	0	0	1	0	0	1	2	1	0	2	0	0	1	0	0	0	1	0	0	0	2	2	1	0	1	2
254	1	15	0	0	0	41.2238	34.4076	41.4032	58.6301	0	0	0	1	0	0	0	0	1	1	4	0	0	1	2	2	0	0	0	0	1	0	1	0	2	0	0	0	0	1
255	0	9	0	0	0	44.5833	50.2229	41.6222	56.3	0	0	1	0	0	1	1	1	1	0	0	0	1	1	2	1	3	0	0	2	0	3	0	0	0	2	0	0	1	0
256	0	10	0	0	0	42.6818	29.4257	49.5354	53.3333	1	0	1	0	0	1	1	0	0	1	1	2	1	1	0	0	2	0	0	1	2	0	1	2	1	1	1	0	1	0
257	0	11	0	0	0	50.7986	51.679	47.2895	59.4059	1	0	0	0	0	0	1	0	1	1	1	2	0	1	2	2	1	1	1	0	0	1	2	0	0	1	0	0	1	0
258	0	11	0	0	0	40.3819	49.2099	37.0226	37.6238	0	0	0	0	0	0	0	0	0	0	2	2	0	1	2	0	1	0	0	1	2	1	1	1	1	1	0	0	1	0
259	0	11	0	0	0	40.3819	41.8025	47.2895	53.4653	1	0	0	1	0	0	1	0	1	1	1	0	3	1	2	0	1	0	2	0	1	0	0	2	1	0	0	0	2	0
260	0	11	0	0	1	40.3819	41.8025	53.4497	55.4455	1	1	1	1	1	1	1	0	1	1	3	1	1	0	2	0	0	1	0	1	1	2	1	0	1	1	0	0	1	0
261	0	11	0	0	0	64.6875	41.8025	43.1828	51.4851	0	1	0	1	0	1	1	1	1	0	1	0	2	1	2	0	0	0	0	0	2	1	2	2	0	1	1	0	0	0
262	0	11	0	0	0	43.8542	56.6173	41.1294	55.4455	1	0	1	1	0	0	1	0	0	1	2	1	1	1	2	0	1	0	1	1	1	1	0	1	1	0	1	1	0	0
263	0	11	0	0	1	43.8542	31.9259	51.3963	57.4257	1	0	0	0	0	1	1	0	1	1	0	2	1	1	2	0	0	0	1	1	2	0	0	2	0	2	0	0	3	0
264	0	12	0	0	0	71.5814	27.5658	58.0477	40.2093	1	1	0	1	0	1	1	1	1	1	0	3	3	1	1	0	0	0	0	1	0	0	1	1	3	0	0	1	0	1
265	0	12	0	0	0	43.6744	47.3026	51.5401	61.1395	0	0	0	1	0	0	1	1	1	1	1	2	1	0	2	0	0	0	1	1	0	1	2	2	0	0	1	0	1	0
267	0	13	0	0	1	45.2817	57.8228	49.2484	61.0366	0	0	0	1	0	0	0	0	1	1	1	0	0	2	2	1	2	0	1	0	0	1	3	1	0	0	1	0	2	0
268	0	13	0	0	1	55.8451	40.1013	47.1608	44.7764	1	1	0	1	0	0	1	1	1	1	1	2	1	0	2	1	0	0	0	0	0	0	0	1	1	2	3	1	0	1
269	0	13	0	0	0	38.2394	52.7595	47.1608	46.8089	1	0	0	1	0	0	1	0	1	1	1	2	1	2	2	1	0	0	1	1	0	1	1	0	1	0	1	0	1	0
270	0	13	0	0	0	38.2394	50.2278	30.4593	63.0691	0	0	0	0	0	0	1	0	0	1	2	0	1	0	2	1	0	0	2	1	0	0	0	2	1	0	0	0	3	0
271	0	14	0	0	1	66.7932	54.1014	58.6122	41.9363	0	0	0	0	0	1	1	0	1	1	2	1	2	1	2	0	0	2	0	1	0	1	0	0	2	0	0	0	1	1
272	0	14	0	0	1	45.6962	54.1014	50.449	54.1912	1	0	0	0	0	1	1	1	1	1	3	2	1	1	2	1	0	0	1	2	2	1	0	0	0	0	1	0	1	0
273	0	15	0	0	1	37.3478	57.5309	35.2273	52.2034	1	0	0	0	0	0	1	0	0	1	3	1	0	1	2	0	0	0	1	0	4	2	0	0	0	0	1	0	1	0
274	0	15	0	0	1	54.7391	57.5309	43.9685	40.0969	1	0	0	0	0	0	1	1	1	1	3	1	0	2	2	0	1	0	1	0	2	1	0	0	1	0	0	0	2	1
275	0	15	0	0	0	41.6957	17.4074	50.9615	42.5182	0	0	0	1	0	0	0	0	0	1	1	0	0	2	2	0	2	3	0	0	1	0	1	0	2	0	0	0	0	1
276	0	15	0	0	0	46.0435	66.7901	57.9545	42.5182	0	1	0	1	0	0	1	0	0	0	1	0	0	2	0	0	1	1	2	1	3	1	1	1	1	0	0	1	1	1
277	1	9	0	0	0	52.6462	36.4793	38.2826	57.7132	0	0	0	0	0	0	1	0	0	1	3	0	0	2	2	0	0	1	0	1	0	0	2	1	0	0	0	0	0	3
278	1	9	0	0	0	52.6462	57.1893	49.1522	55.7752	0	0	0	0	0	0	1	1	1	1	2	1	0	1	2	2	0	0	2	1	1	0	0	1	2	0	0	0	2	0
279	1	9	0	0	0	52.6462	33.5207	49.1522	49.9612	1	0	0	1	0	0	1	1	1	1	1	2	0	0	2	0	0	1	0	0	1	0	1	1	3	0	3	0	0	0
280	1	10	0	0	0	40.2827	52.9722	45.5531	54.6055	1	0	0	0	0	1	1	0	0	1	1	2	3	0	2	0	3	0	0	0	0	0	0	1	3	0	0	0	0	0
281	1	10	0	0	0	68.5512	27.9722	47.7223	52.4733	0	0	0	0	0	0	1	0	0	1	2	2	0	2	2	0	0	1	0	1	2	1	0	0	0	0	3	0	2	0
282	1	10	0	0	0	43.8163	41.8611	41.2148	48.209	0	0	0	0	0	0	1	1	1	1	1	2	1	0	2	1	0	0	1	0	1	0	0	1	2	0	2	0	1	0
283	1	10	0	1	1	40.2827	44.6389	47.7223	37.548	0	0	0	1	0	1	1	1	0	1	3	2	0	1	0	1	0	0	0	0	1	1	0	4	1	0	0	1	1	0
284	1	10	0	0	1	68.5512	41.8611	67.2451	48.209	1	0	0	0	0	0	1	0	1	1	0	1	0	2	2	0	1	0	2	1	2	0	1	2	1	0	1	0	1	0
285	1	10	0	0	0	54.417	27.9722	56.3991	43.9446	0	0	0	0	0	0	0	1	1	1	2	2	2	1	2	1	1	1	1	0	0	0	0	0	0	0	1	1	1	1
286	1	10	0	0	0	54.417	44.6389	52.0607	41.8124	0	1	0	1	0	1	1	0	0	0	1	2	2	1	2	0	0	0	0	0	1	2	1	2	1	0	0	0	0	0
287	1	11	0	0	0	33.5764	51.9732	35.3556	56.2972	0	1	0	1	0	0	0	0	0	1	2	1	1	1	2	1	0	0	1	1	1	1	1	1	1	1	0	0	0	0
288	1	11	0	0	0	37.0486	31.9064	55.3556	63.8539	1	0	0	0	0	0	0	1	0	1	2	2	1	1	3	1	1	1	1	0	0	0	0	0	1	1	0	0	1	0
289	1	11	0	0	1	75.2431	28.5619	66.4667	48.7406	1	0	0	0	0	0	0	0	0	1	0	0	0	1	2	0	0	0	2	1	1	1	0	0	0	3	3	0	2	1
290	1	12	0	0	1	40.3401	29.9083	48.7131	21.4691	0	0	0	1	0	0	1	0	1	1	2	3	1	0	2	1	1	1	1	1	0	0	0	0	1	0	0	0	1	0
291	1	12	0	0	0	33.5374	26.8502	40.2743	47.2423	0	0	0	0	0	0	1	0	0	0	1	0	1	1	2	2	0	2	0	1	2	0	0	1	1	0	2	0	0	0
292	1	12	0	0	0	33.5374	39.0826	36.0549	57.5515	0	0	0	0	0	0	1	1	1	1	0	1	2	1	0	2	3	0	0	1	1	0	1	3	1	0	0	0	0	0
293	1	12	0	0	0	43.7415	36.0245	42.384	21.4691	0	0	0	1	0	0	1	0	1	1	2	2	1	1	1	1	1	1	0	1	1	0	0	0	2	0	1	0	2	0
294	1	12	0	0	1	36.9388	54.3731	48.7131	67.8608	0	0	0	1	0	0	1	0	0	1	4	1	0	0	0	0	0	0	0	1	0	0	4	2	3	0	0	0	0	0
295	1	12	0	0	0	47.1429	23.792	52.9325	65.2835	1	0	0	0	0	0	0	0	1	0	3	3	1	0	0	0	0	1	1	3	0	0	0	0	3	0	0	0	0	0
296	1	12	0	0	0	40.3401	26.8502	46.6034	60.1289	0	0	0	1	0	0	1	0	1	1	2	2	1	1	2	1	1	0	0	0	3	0	0	0	0	0	2	0	1	0
297	1	12	0	0	0	43.7415	36.0245	57.1519	60.1289	0	1	1	1	0	0	1	0	0	1	1	2	0	1	2	0	0	1	0	1	3	0	1	0	2	0	0	0	1	2
298	1	13	0	0	0	39.0149	49.5513	41.802	57.8767	1	0	0	1	0	0	1	0	1	1	3	1	0	2	2	1	0	0	0	0	0	0	0	3	0	3	0	0	0	0
299	1	13	0	0	1	47.9701	23.9103	59.6238	39.6119	1	0	0	1	0	0	0	0	1	1	3	1	0	0	2	0	3	0	1	0	0	0	0	0	4	0	0	1	0	0
300	1	13	0	0	1	42	39.9359	51.703	39.6119	0	0	0	1	0	0	1	0	1	1	2	3	2	1	2	1	0	0	0	1	1	0	0	2	1	0	0	0	1	0
301	1	13	0	0	1	42	39.9359	43.7822	53.3105	1	0	0	1	0	1	1	0	1	1	3	2	1	2	1	0	0	0	1	2	0	0	0	1	1	0	0	0	3	0
302	1	14	0	0	0	39.8214	56.4371	34.2653	56.9281	1	1	0	1	0	0	0	0	1	1	2	0	3	0	0	3	0	0	2	0	1	0	3	0	0	0	0	0	1	0
303	1	14	0	0	1	46.9643	56.4371	58.7551	48.2135	1	0	1	1	0	1	0	0	0	1	2	1	1	1	2	1	1	0	1	1	1	1	1	0	1	0	0	0	1	1
304	1	14	0	0	0	36.25	23.503	44.4694	52.5708	1	0	0	1	0	0	1	0	0	1	1	2	1	1	2	0	0	0	1	0	1	0	0	3	2	1	0	0	1	0
305	1	14	0	0	1	46.9643	44.4611	50.5918	41.6776	1	0	0	0	0	0	0	0	0	1	4	1	1	2	2	1	0	0	1	0	0	1	0	0	0	0	1	0	3	0
306	1	14	0	0	0	57.6786	41.4671	52.6327	43.8562	1	0	0	1	0	0	1	1	0	0	1	0	2	1	2	0	0	1	1	1	2	2	1	1	0	1	0	0	0	0
307	1	15	0	0	1	65.6993	50.9953	59.1897	44.9315	0	0	0	1	0	0	1	0	1	1	2	2	0	1	0	0	1	0	0	2	0	3	1	2	0	0	0	0	0	1
309	1	15	0	0	0	41.2238	48.6256	45.3557	60.9132	0	0	0	1	0	0	1	0	1	1	1	0	1	0	2	1	0	0	0	0	1	2	3	2	2	0	0	0	0	0
310	1	15	0	0	1	41.2238	46.2559	33.498	44.9315	1	1	0	1	0	0	1	0	0	1	2	0	1	2	2	0	0	0	0	0	0	2	2	0	2	1	1	0	0	0
311	0	9	0	0	0	60.2083	53.4076	46.0667	49.6333	1	0	0	0	0	0	1	0	0	1	1	2	3	1	2	1	0	0	1	0	1	1	0	1	1	0	0	0	2	0
312	0	9	0	0	1	86.25	27.9299	57.1778	12.9667	1	0	0	1	0	1	1	0	1	1	0	2	1	1	2	2	0	0	1	1	1	0	2	1	1	0	1	0	2	0
313	0	9	0	0	1	49.7917	40.6688	61.6222	42.9667	1	0	0	1	0	1	1	1	1	1	1	2	1	2	1	0	1	0	0	0	1	0	1	1	2	1	0	1	2	2
314	0	10	0	0	0	42.6818	39.5608	65.0221	58.1995	1	0	0	0	0	1	1	1	0	1	2	3	1	1	1	2	0	1	0	1	1	1	0	1	0	2	0	0	0	0
315	0	10	0	0	0	74.5	46.3176	60.5973	31.4355	0	0	0	1	0	0	1	1	1	1	3	0	1	0	2	0	0	0	1	1	0	1	0	3	1	0	1	1	1	1
316	0	10	0	0	1	79.0455	36.1824	60.5973	46.0341	0	0	0	0	0	1	0	1	1	1	2	0	1	0	2	2	1	2	1	2	1	0	1	1	0	1	0	0	0	0
317	0	10	0	0	1	56.3182	32.8041	69.4469	33.8686	0	0	0	0	0	1	1	1	1	1	2	1	0	2	2	0	0	1	0	1	0	3	0	1	2	0	0	0	3	0
318	0	10	0	0	0	42.6818	22.6689	58.385	38.7348	0	0	0	0	0	0	0	1	0	1	2	0	0	2	2	0	1	0	2	2	1	0	1	1	3	0	0	0	2	0
319	0	10	0	0	0	51.7727	22.6689	73.8717	46.0341	1	0	0	0	0	1	1	0	0	1	3	1	1	2	2	0	2	0	0	0	0	1	0	0	0	1	0	1	4	0
320	0	10	0	0	0	51.7727	42.9392	49.5354	48.4672	0	0	1	1	0	1	1	0	1	1	3	2	1	2	0	0	0	0	1	0	0	1	1	2	1	1	1	0	1	0
321	0	10	0	0	0	42.6818	49.6959	40.6858	43.601	1	0	0	0	0	1	1	1	1	0	3	2	1	1	1	1	0	0	0	1	1	1	0	2	2	1	0	0	0	0
322	0	11	0	0	0	40.3819	51.679	37.0226	51.4851	1	0	0	0	0	0	0	0	0	1	3	1	3	1	2	0	0	0	1	0	0	0	1	0	2	1	0	0	2	0
323	0	11	0	0	1	47.3264	54.1481	43.1828	53.4653	0	1	0	1	0	0	1	1	1	1	2	1	1	2	2	1	0	0	1	0	0	1	0	0	2	2	0	0	2	1
324	0	11	0	1	0	40.3819	49.2099	37.0226	59.4059	0	1	0	1	0	0	1	1	1	0	3	1	1	1	2	1	0	0	1	1	0	0	0	3	1	0	0	0	2	0
325	0	12	0	0	1	43.6744	47.3026	38.5249	61.1395	0	0	0	1	0	0	1	0	0	1	3	1	2	3	0	0	0	0	2	0	0	0	0	4	1	0	0	0	1	0
326	0	12	0	0	1	52.9767	27.5658	36.3557	35.5581	1	0	0	1	0	1	1	0	1	1	2	2	2	1	0	0	0	0	2	0	0	1	2	1	2	0	1	0	1	0
327	0	12	0	0	0	76.2326	34.1447	55.8785	40.2093	1	0	0	0	0	0	1	0	1	1	1	0	1	1	2	0	0	0	1	2	2	2	2	0	2	2	0	0	1	0
328	0	12	0	0	1	62.2791	30.8553	53.7093	28.5814	0	0	0	0	0	0	0	1	1	1	1	0	0	3	1	2	2	1	0	0	1	0	3	0	1	0	0	0	0	1
329	0	12	0	0	1	43.6744	40.7237	36.3557	61.1395	1	0	0	1	0	0	1	0	0	1	0	1	4	1	2	1	0	0	1	1	2	1	0	0	0	1	1	1	1	1
330	0	12	0	0	0	66.9302	47.3026	47.2017	51.8372	0	1	0	1	0	1	1	0	1	1	0	1	0	0	2	0	0	1	1	2	3	1	2	0	1	0	0	0	3	1
331	0	13	0	1	1	69.9296	45.1646	63.8622	30.5488	1	0	0	0	0	0	1	0	1	1	2	0	0	2	0	0	1	1	0	1	0	2	1	0	4	0	0	0	3	1
332	0	13	0	0	1	62.8873	37.5696	53.4238	52.9065	0	0	1	1	1	1	0	0	1	1	3	1	2	0	2	0	0	1	1	0	2	0	0	0	0	0	0	0	4	0
333	0	13	0	0	1	45.2817	50.2278	53.4238	48.8415	0	0	0	1	0	0	1	1	1	1	1	1	1	1	2	0	0	0	1	0	2	4	1	1	1	0	0	0	1	0
334	0	13	0	0	0	55.8451	55.2911	36.7223	65.1016	1	0	0	0	0	0	1	1	0	1	4	0	1	1	2	2	1	1	0	0	0	1	1	1	1	0	0	0	1	0
335	0	13	0	0	0	38.2394	50.2278	42.9854	48.8415	0	0	0	0	0	0	1	0	0	1	2	1	2	2	2	0	0	0	0	0	2	1	1	2	1	0	0	0	2	0
336	0	14	0	0	0	41.4768	42.5806	38.2041	54.1912	0	0	0	1	0	1	1	0	1	1	1	2	2	2	0	2	1	0	0	0	0	0	0	1	1	0	3	0	3	0
337	0	14	0	0	1	37.2574	40.2765	46.3673	46.8382	0	0	0	1	0	0	1	1	1	1	2	1	1	1	2	0	1	0	1	1	1	2	1	1	1	0	0	1	1	1
338	0	14	0	0	0	45.6962	63.318	44.3265	46.8382	1	0	0	1	0	1	0	0	1	1	2	1	1	1	0	1	1	2	0	0	1	1	1	0	2	0	1	0	2	0
339	0	14	0	0	0	54.135	35.6682	44.3265	37.0343	1	0	0	1	0	0	1	0	1	1	1	1	0	1	2	0	0	1	0	1	1	2	2	2	1	1	0	0	1	1
340	0	15	0	0	1	63.4348	29.7531	40.472	44.9395	0	0	0	1	0	0	1	0	0	1	2	1	0	3	2	0	0	1	1	0	0	1	1	3	0	0	0	0	0	1
341	0	15	0	0	0	41.6957	60.6173	52.7098	54.6247	1	0	1	0	0	0	0	1	1	1	2	1	3	0	2	1	0	0	0	1	1	2	0	0	0	0	0	2	2	2
342	1	7	0	0	0	41.7931	61.9268	52.6196	57.1237	0	1	1	1	0	1	1	0	1	0	2	1	2	1	0	0	0	0	3	1	1	0	0	1	1	1	0	0	0	3
343	1	8	0	0	1	83.5786	41.0263	67.5318	36.4431	0	1	0	0	1	0	1	0	1	1	0	1	0	1	2	0	0	1	0	4	2	1	1	1	1	1	1	0	1	1
344	1	9	0	0	1	58.8	24.645	51.3261	44.1473	0	0	0	0	0	0	0	0	0	1	1	2	0	2	2	2	0	1	0	0	1	2	0	0	1	1	1	0	1	0
345	1	10	0	0	1	47.3498	36.3056	32.538	52.4733	0	0	0	0	0	0	0	1	1	1	0	1	1	1	1	1	1	1	1	1	1	1	1	1	1	1	1	1	1	1
346	1	11	0	0	0	40.5208	21.8729	39.8	66.3728	0	0	0	0	0	0	1	1	1	1	2	2	1	1	2	0	0	0	1	1	1	1	1	1	2	0	1	0	1	0
347	1	11	0	0	1	40.5208	18.5284	39.8	53.7783	1	1	1	1	0	1	1	0	1	1	2	2	1	0	2	0	0	1	2	0	0	2	0	2	0	2	0	0	0	0
348	1	11	0	0	0	50.9375	35.2508	57.5778	46.2217	0	0	0	1	0	1	1	1	1	1	1	2	3	0	2	1	0	2	1	0	0	1	0	0	0	0	0	0	3	0
349	1	12	0	0	0	36.9388	42.1407	38.1646	52.3969	1	0	1	1	0	0	0	1	1	1	2	1	1	0	0	0	0	0	2	2	1	1	0	2	2	1	0	0	2	0
350	1	12	0	0	0	43.7415	36.0245	44.4937	44.6649	1	0	0	0	0	0	1	0	1	1	1	2	0	0	2	2	0	0	0	1	0	0	1	4	0	0	0	2	1	0
351	1	12	0	0	0	36.9388	39.0826	42.384	65.2835	1	0	0	1	0	0	1	1	1	1	4	1	0	0	2	0	0	0	4	0	0	4	1	0	0	0	0	0	0	0
352	1	12	0	0	1	47.1429	51.315	59.2616	54.9742	1	1	0	1	0	0	1	0	0	1	1	2	2	2	2	0	1	1	1	0	1	1	0	0	0	0	0	0	2	2
353	1	12	0	0	0	53.9456	39.0826	50.8228	49.8196	0	0	0	0	0	0	0	0	0	0	0	2	0	0	2	0	0	0	1	0	2	1	0	2	1	0	0	0	3	2
354	1	12	0	0	0	43.7415	23.792	48.7131	65.2835	0	0	0	1	0	0	0	0	0	0	2	1	0	2	2	0	0	0	0	1	0	1	1	2	2	1	0	1	0	1
355	1	12	0	0	0	57.3469	39.0826	74.0295	47.2423	1	0	0	1	0	0	1	1	1	1	1	2	0	2	2	0	0	1	0	0	1	0	2	1	2	1	0	1	2	0
356	1	13	0	0	0	62.8955	36.7308	49.7228	39.6119	0	0	0	0	0	0	0	0	1	1	2	0	1	1	2	0	1	0	2	1	2	0	1	0	2	2	0	0	0	0
358	1	13	0	0	0	47.9701	23.9103	37.8416	55.5936	1	0	0	1	0	0	0	0	0	1	2	1	2	1	2	2	0	1	1	1	1	1	1	0	1	0	0	0	1	0
359	1	13	0	0	1	44.9851	49.5513	41.802	55.5936	1	0	0	1	0	0	1	0	1	1	4	0	1	2	0	0	0	0	1	0	0	2	4	0	1	0	1	0	0	0
360	1	13	0	0	1	36.0299	49.5513	47.7426	69.2922	1	0	1	1	0	1	1	0	1	1	3	2	2	1	2	0	0	0	1	1	0	0	0	1	0	2	0	0	2	0
361	1	13	0	0	0	50.9552	27.1154	53.6832	41.895	1	0	0	1	0	0	1	0	1	1	1	0	1	0	2	0	0	2	1	1	3	0	1	1	1	1	0	0	2	0
362	1	13	0	0	1	39.0149	43.141	35.8614	51.0274	1	0	0	1	0	0	0	0	0	1	4	0	0	0	0	0	0	0	1	0	4	0	4	3	0	0	0	0	0	0
363	1	13	0	1	1	56.9254	55.9615	43.7822	41.895	1	0	0	1	0	1	0	1	1	1	4	4	0	0	2	0	0	0	0	0	0	0	0	0	2	0	0	4	0	0
364	1	14	0	0	0	57.6786	29.491	42.4286	54.7495	0	0	0	0	0	0	1	1	0	1	0	2	0	0	2	0	0	0	1	0	2	1	0	2	1	0	0	0	3	2
365	1	14	0	0	1	46.9643	47.4551	46.5102	48.2135	1	0	0	0	0	0	1	0	0	1	1	0	1	2	2	0	1	1	0	1	1	2	1	1	2	1	0	0	2	0
366	1	14	0	0	1	46.9643	50.4491	38.3469	56.9281	1	0	0	1	0	0	0	0	1	1	1	2	0	1	0	0	1	0	2	3	2	0	0	2	1	0	1	0	3	0
367	1	14	0	0	0	57.6786	35.479	56.7143	48.2135	1	0	0	1	0	0	0	0	1	1	4	2	0	1	2	1	0	0	1	0	4	0	0	0	0	0	0	1	0	1
368	1	14	0	0	1	64.8214	35.479	58.7551	35.1416	1	1	0	1	0	1	1	0	1	1	3	1	2	1	1	1	0	0	0	0	1	1	0	1	1	1	1	0	2	0
369	1	14	0	0	0	50.5357	29.491	62.8367	39.4989	1	0	1	1	0	0	0	1	1	1	1	0	1	1	2	1	0	0	4	0	1	0	4	0	0	0	0	1	1	1
370	1	15	0	0	0	65.6993	48.6256	53.2609	38.0822	1	1	0	1	1	0	0	0	1	0	1	1	2	3	0	1	0	0	0	1	2	2	1	0	2	0	1	0	0	0
371	1	15	0	0	1	44.7203	60.4739	43.3794	49.4977	1	0	0	1	0	1	1	1	1	1	2	2	2	1	2	1	0	0	1	0	0	2	1	1	1	0	0	0	1	0
372	0	7	0	0	1	46.4906	46.898	60.1644	27.3256	0	1	0	1	1	1	1	0	0	1	4	1	3	1	2	0	1	0	0	0	1	3	0	0	1	0	0	0	1	0
373	0	7	0	0	1	69.1321	38.7347	51.9452	27.3256	0	0	0	0	1	1	1	1	1	1	1	2	0	2	2	0	2	0	0	2	2	0	2	0	0	0	2	2	0	2
374	0	8	0	0	0	59.799	36.4943	59.9515	57.6771	1	1	0	0	0	0	1	1	1	1	1	1	2	0	1	0	3	0	0	0	3	0	3	0	0	3	0	0	0	0
375	0	9	0	1	1	39.375	66.1465	39.4	36.3	1	0	0	0	0	1	1	0	0	1	4	1	1	3	0	0	0	0	4	0	0	0	0	0	0	4	0	0	0	0
376	0	9	0	0	0	60.2083	50.2229	52.7333	46.3	0	1	1	1	0	1	0	1	1	1	1	1	0	0	0	3	0	0	1	3	2	0	3	2	1	0	1	0	1	0
377	0	10	0	0	0	42.6818	42.9392	40.6858	53.3333	0	0	0	1	0	0	1	0	1	1	1	1	2	2	1	1	0	1	2	1	1	1	1	1	0	0	1	1	2	0
378	0	10	0	0	0	51.7727	36.1824	49.5354	46.0341	1	0	0	0	0	0	1	1	1	1	1	2	0	0	2	0	0	1	0	0	1	0	1	2	0	1	2	3	1	1
379	0	11	0	0	0	40.3819	51.679	39.076	43.5644	1	0	0	0	0	1	1	0	1	1	1	1	0	1	0	0	1	1	4	1	0	1	1	0	0	1	2	0	3	0
380	0	11	0	1	1	54.2708	44.2716	39.076	39.604	1	0	0	0	0	0	0	0	0	0	1	0	2	2	2	1	1	0	2	1	2	0	1	1	1	0	1	0	2	0
381	0	11	0	0	1	47.3264	39.3333	32.9158	47.5248	0	1	0	1	0	0	1	0	0	1	2	1	1	0	2	0	1	0	0	2	1	1	1	2	1	2	0	1	0	0
382	0	11	0	0	0	43.8542	54.1481	37.0226	55.4455	0	0	0	0	0	0	1	0	0	1	1	0	2	0	2	2	1	0	2	1	1	0	0	1	2	0	1	0	2	0
383	0	11	0	0	0	78.5764	36.8642	55.5031	41.5842	0	0	0	0	0	0	1	0	1	1	1	2	0	1	2	0	0	0	1	2	1	2	2	1	2	0	0	0	2	0
384	0	12	0	0	0	66.9302	40.7237	42.8633	56.4884	0	1	0	0	0	1	1	1	0	1	3	0	3	1	2	3	0	0	0	0	1	0	1	0	0	1	2	0	0	0
385	0	12	0	0	0	62.2791	47.3026	51.5401	44.8605	1	0	0	1	0	0	0	0	1	1	1	0	1	1	2	2	0	0	4	0	2	0	0	2	1	0	1	0	1	0
386	0	12	0	0	1	48.3256	53.8816	38.5249	56.4884	1	0	1	1	0	1	1	1	1	1	1	2	2	2	2	0	1	0	2	0	1	1	1	1	1	0	0	0	1	0
387	0	13	0	0	0	41.7606	40.1013	34.6347	50.874	0	0	0	1	0	0	1	1	1	1	1	2	0	1	2	0	0	1	2	0	1	1	2	0	0	1	1	0	2	1
388	0	13	0	0	0	59.3662	42.6329	51.3361	40.7114	0	1	0	1	0	0	1	0	1	1	0	1	0	2	2	1	3	0	2	0	2	0	1	1	0	1	0	1	2	0
389	0	13	0	0	1	52.3239	50.2278	51.3361	48.8415	0	1	0	1	0	0	1	1	1	1	2	1	3	1	2	0	0	0	2	2	1	1	0	0	3	0	0	0	0	0
390	0	13	0	0	1	45.2817	45.1646	47.1608	59.0041	1	0	0	1	0	1	1	0	1	1	2	1	2	2	2	1	0	0	1	1	1	1	1	0	1	1	1	0	1	0
391	0	13	0	0	0	45.2817	47.6962	36.7223	54.939	1	1	0	1	0	1	1	1	1	1	2	1	1	1	2	1	0	0	2	0	0	1	0	1	3	0	1	0	2	0
392	0	14	0	0	0	41.4768	51.7972	36.1633	66.4461	1	0	0	0	0	0	1	0	1	0	2	1	2	0	#NULL!	0	0	2	3	0	1	0	0	4	0	1	0	0	1	0
393	0	14	0	1	1	58.3544	56.4055	44.3265	32.1324	1	0	0	1	0	0	0	0	0	1	2	1	0	1	2	0	1	1	0	0	2	1	1	0	3	0	0	1	0	2
394	0	14	0	0	0	37.2574	63.318	38.2041	44.3873	0	0	0	0	0	0	0	0	0	0	1	0	0	1	2	0	1	0	2	0	4	0	0	0	3	0	0	0	4	0
395	0	15	0	0	0	59.087	26.6667	42.2203	57.046	1	0	0	0	0	0	1	0	0	1	3	2	1	1	2	0	0	0	1	0	0	0	0	2	2	1	1	0	2	0
396	0	15	0	0	0	50.3913	54.4444	36.9755	42.5182	1	1	0	1	0	0	1	0	1	1	2	2	1	0	0	1	0	0	4	1	1	1	1	0	2	1	0	0	1	0
397	0	15	0	0	0	33	39.0123	63.1993	32.8329	1	0	0	1	0	0	1	0	0	1	1	2	0	3	0	0	1	2	0	1	1	1	1	0	1	0	1	2	3	3
398	0	15	0	0	0	46.0435	54.4444	35.2273	54.6247	1	0	0	0	0	0	1	0	0	1	3	1	0	1	2	0	0	0	2	0	4	2	0	0	0	0	1	0	2	0
399	0	15	0	0	1	46.0435	63.7037	50.9615	40.0969	0	0	0	1	0	1	0	0	1	0	1	0	0	2	2	0	0	0	0	0	2	2	1	1	2	3	1	0	0	0
400	1	8	0	0	1	43.4448	48.1862	62.4427	56.8513	0	0	0	1	0	0	1	0	1	1	2	2	2	2	2	1	0	0	0	1	1	0	1	0	1	0	0	0	4	1
403	1	10	0	0	1	65.0177	36.3056	58.5683	50.3412	0	0	0	0	0	1	1	0	1	1	1	1	2	0	2	1	1	2	1	2	2	0	0	1	2	0	0	0	1	0
404	1	10	0	0	0	54.417	22.4167	41.2148	35.4158	1	0	0	1	0	1	1	1	1	1	2	1	1	1	2	1	0	0	1	2	1	0	1	1	3	0	1	0	0	0
405	1	11	0	0	1	40.5208	51.9732	30.9111	68.8917	1	0	0	0	0	0	1	1	0	1	1	2	2	1	1	2	0	0	0	0	1	1	0	1	0	0	3	0	3	0
406	1	11	0	0	1	37.0486	38.5953	39.8	63.8539	0	0	0	0	0	0	0	0	1	1	4	1	4	1	1	1	2	0	0	1	1	0	1	0	0	1	0	0	1	0
407	1	11	0	0	0	43.9931	62.0067	42.0222	66.3728	1	0	0	1	0	1	1	1	1	1	1	1	2	2	2	1	1	1	0	1	1	1	1	1	0	1	1	0	1	0
408	1	11	0	0	0	33.5764	48.6288	35.3556	63.8539	0	0	0	1	0	0	0	0	0	0	2	0	0	0	2	0	0	0	0	4	2	0	2	2	1	0	0	0	4	0
410	1	12	0	0	0	40.3401	36.0245	44.4937	39.5103	0	1	0	1	0	0	1	0	0	1	1	1	0	1	2	0	0	0	4	0	0	0	0	4	3	0	0	0	2	0
411	1	12	0	0	0	47.1429	48.2569	46.6034	57.5515	1	0	0	1	0	0	1	0	0	0	3	2	2	1	2	0	0	0	1	0	0	1	0	1	1	1	0	0	3	0
412	1	12	0	0	0	53.9456	36.0245	50.8228	34.3557	1	0	0	1	0	0	1	0	0	1	0	1	2	4	1	0	1	1	0	3	0	0	0	0	4	0	0	0	1	0
413	1	12	0	0	0	47.1429	51.315	48.7131	60.1289	0	0	0	0	0	0	1	1	1	1	1	2	0	1	2	0	0	0	1	0	0	0	1	1	2	1	2	2	2	2
414	1	12	0	0	1	47.1429	17.6758	42.384	42.0876	0	0	1	1	0	0	0	1	1	1	2	1	0	0	1	0	0	1	1	0	0	0	1	4	1	0	3	0	2	0
415	1	12	0	0	0	47.1429	48.2569	48.7131	52.3969	1	0	0	1	0	0	1	1	0	1	2	2	1	1	2	2	0	0	3	0	0	0	0	0	0	0	1	2	2	0
416	1	13	0	0	0	47.9701	23.9103	49.7228	46.4612	0	0	0	0	0	1	1	1	1	1	2	1	1	2	2	0	2	1	1	1	1	1	0	1	1	0	1	0	0	0
417	1	13	0	0	0	39.0149	39.9359	39.8218	64.726	1	0	0	0	0	1	1	1	0	0	2	1	1	1	2	2	0	2	1	1	2	0	0	0	0	2	0	0	2	0
418	1	13	0	1	0	44.9851	46.3462	51.703	39.6119	1	1	1	1	0	0	0	0	0	0	1	0	0	2	2	1	1	0	1	1	1	3	2	1	1	1	0	0	0	0
419	1	13	0	0	1	44.9851	46.3462	57.6436	51.0274	0	0	0	1	0	1	1	0	1	1	2	1	1	1	2	1	1	1	0	0	1	0	0	2	1	0	1	2	1	0
420	1	13	0	1	0	74.8358	36.7308	51.703	46.4612	1	0	0	1	0	0	0	1	1	1	1	1	1	1	2	1	1	1	1	1	1	1	1	1	1	1	1	0	1	0
421	1	13	0	0	0	44.9851	23.9103	57.6436	55.5936	0	1	0	0	0	1	1	1	1	1	1	0	2	2	1	0	0	0	2	3	2	1	1	0	1	0	2	0	1	1
422	1	13	0	0	0	47.9701	43.141	51.703	55.5936	0	0	0	1	0	0	0	1	0	1	1	1	3	2	2	0	1	0	2	1	0	0	1	2	0	0	0	1	2	0
423	1	14	0	0	1	50.5357	53.4431	44.4694	48.2135	1	0	0	0	0	0	1	1	1	1	2	1	1	2	0	0	1	1	0	1	1	2	1	2	1	1	1	0	1	0
424	1	14	0	0	0	50.5357	20.509	52.6327	46.0349	0	0	0	1	0	0	1	1	1	0	2	1	1	1	2	0	1	0	2	2	1	1	0	0	2	0	0	0	3	0
425	1	14	0	0	0	54.1071	59.4311	46.5102	46.0349	1	1	0	1	0	0	1	0	1	1	2	2	2	2	0	0	1	1	1	0	4	0	0	0	1	1	0	0	2	0
426	1	14	0	0	0	46.9643	44.4611	44.4694	37.3203	0	0	0	0	0	0	0	0	1	1	3	2	3	1	2	1	1	0	1	0	1	0	0	0	0	0	0	0	3	0
427	1	14	0	0	1	43.3929	50.4491	46.5102	35.1416	1	0	0	1	0	0	0	1	1	1	1	0	1	2	0	2	0	2	1	0	1	2	0	0	3	2	0	0	0	0
429	1	14	0	0	1	75.5357	44.4611	62.8367	32.963	1	0	0	0	0	0	0	0	0	1	1	0	0	2	2	0	3	4	0	1	2	0	1	0	2	0	0	0	0	0
430	1	14	0	0	1	61.25	20.509	60.7959	43.8562	1	0	0	1	0	0	1	0	0	1	2	1	0	1	2	0	3	3	0	1	0	1	1	0	0	1	0	0	2	0
431	1	15	0	0	0	34.2308	48.6256	43.3794	35.7991	0	0	0	1	0	0	1	0	0	1	1	1	1	2	0	1	0	1	2	1	3	1	1	1	1	1	0	0	1	0
434	0	8	0	0	0	44.7236	39.3678	55.0971	57.6771	1	0	0	0	0	0	1	0	0	0	2	1	0	3	1	0	1	3	1	2	1	2	0	0	2	0	0	0	1	0
435	0	9	0	0	0	65.4167	37.4841	50.5111	52.9667	0	0	0	0	0	0	1	1	1	1	1	2	1	2	1	0	1	1	2	1	3	1	0	1	0	1	0	0	2	1
436	0	10	0	0	0	47.2273	66.5878	67.2345	46.0341	0	0	0	0	0	0	1	0	0	1	1	0	1	2	2	1	1	0	1	1	2	2	3	1	1	0	0	0	1	0
438	0	10	0	0	0	47.2273	46.3176	49.5354	38.7348	0	0	0	0	0	0	1	1	1	1	2	2	1	2	2	0	0	1	1	0	0	2	1	2	2	0	0	0	0	0
439	0	10	0	0	0	51.7727	49.6959	45.1106	50.9002	0	0	0	0	0	0	1	0	0	1	3	1	1	1	2	1	0	0	1	1	2	1	0	4	1	0	0	0	1	0
441	0	10	0	0	1	42.6818	49.6959	40.6858	48.4672	1	1	1	1	0	0	0	0	1	1	1	0	4	1	2	0	1	0	4	0	1	0	4	0	0	0	0	0	0	0
442	0	10	0	0	1	47.2273	39.5608	47.323	55.7664	0	0	0	0	0	0	0	0	0	0	1	2	1	1	2	0	2	1	2	1	1	2	1	0	1	0	1	0	1	0
443	0	11	0	1	0	47.3264	41.8025	53.4497	55.4455	0	1	0	0	0	0	1	1	1	1	1	3	1	3	2	0	0	0	1	4	2	1	1	1	0	0	0	0	0	0
444	0	11	0	0	0	47.3264	46.7407	41.1294	41.5842	1	1	0	0	0	0	0	0	1	1	2	1	2	0	0	1	0	0	4	1	2	0	0	1	0	0	1	0	4	0
445	0	11	0	0	1	43.8542	46.7407	39.076	43.5644	1	0	0	1	0	0	1	1	1	1	1	1	1	1	2	1	0	1	2	0	2	1	1	1	2	1	0	0	1	0
446	0	11	0	0	0	47.3264	44.2716	63.7166	47.5248	1	1	0	0	0	0	1	1	0	1	2	1	2	1	2	1	1	1	1	2	2	1	0	0	2	1	0	0	1	0
447	0	11	0	0	0	43.8542	24.5185	41.1294	49.505	1	0	0	1	0	0	0	1	0	0	2	1	1	2	2	0	0	0	1	1	2	1	2	1	1	0	0	0	1	2
448	0	12	0	0	1	62.2791	60.4605	60.2169	44.8605	0	0	0	0	0	0	1	0	1	1	3	1	2	1	1	1	0	0	1	0	2	0	1	1	1	1	0	0	3	0
449	0	12	0	0	1	39.0233	30.8553	45.0325	51.8372	0	0	0	1	0	0	1	0	0	0	1	0	3	1	2	0	0	1	4	1	1	0	1	0	1	0	1	2	1	0
450	0	12	0	0	0	39.0233	37.4342	42.8633	40.2093	1	0	0	0	0	0	1	1	0	1	1	2	2	1	0	1	1	0	2	1	1	2	0	0	1	0	2	0	3	0
451	0	13	0	0	0	45.2817	47.6962	36.7223	52.9065	1	0	0	0	0	1	1	1	1	1	4	1	2	1	2	0	0	1	1	1	1	1	1	1	1	0	1	0	1	0
452	0	13	0	0	0	45.2817	45.1646	53.4238	52.9065	1	0	0	1	0	0	1	1	0	0	2	1	1	2	2	0	0	0	1	1	2	1	2	1	1	0	0	0	1	2
453	0	13	0	1	0	55.8451	52.7595	47.1608	42.7439	0	0	0	1	0	0	1	1	1	1	4	2	1	0	0	0	0	0	1	0	2	3	0	1	2	0	0	0	1	1
454	0	13	0	0	1	45.2817	60.3544	51.3361	52.9065	1	0	0	1	0	0	1	1	1	1	2	2	2	0	2	1	0	0	1	1	0	1	1	1	1	0	2	0	1	0
455	0	13	0	0	1	52.3239	37.5696	57.5992	46.8089	1	0	0	1	0	0	1	1	0	1	1	2	3	1	2	1	0	0	1	1	0	0	1	1	0	1	2	0	2	0
456	0	13	0	0	0	48.8028	52.7595	32.547	52.9065	0	1	0	0	0	0	1	0	0	1	2	1	1	1	2	1	0	1	2	1	1	2	1	1	1	0	0	0	1	1
457	0	13	0	0	0	45.2817	52.7595	49.2484	48.8415	1	0	0	1	0	0	0	0	0	0	0	2	1	0	2	0	0	0	1	0	0	0	4	4	0	0	0	2	2	1
458	0	13	0	0	0	59.3662	32.5063	42.9854	36.6463	1	1	0	1	0	1	1	1	1	1	1	2	2	1	2	0	0	2	1	2	1	1	0	0	2	0	0	0	3	0
460	0	14	0	0	0	45.6962	37.9724	40.2449	39.4853	0	0	0	0	0	0	1	1	0	0	1	2	0	2	2	0	0	1	0	1	0	1	2	1	2	0	2	0	3	0
461	0	14	0	1	1	62.5738	54.1014	64.7347	44.3873	1	0	0	0	0	0	1	1	1	1	2	1	1	3	2	0	1	0	2	2	1	1	3	0	0	0	0	0	3	0
462	0	14	0	0	0	49.9156	37.9724	48.4082	37.0343	0	1	0	1	0	0	1	1	1	1	2	1	1	1	1	0	0	2	3	2	1	0	0	1	1	1	0	0	3	0
463	0	15	0	0	1	41.6957	45.1852	54.458	35.2542	1	1	0	1	0	0	1	1	1	1	3	2	1	2	0	2	0	1	2	0	1	2	1	1	0	0	0	0	0	0
464	0	15	0	0	1	41.6957	57.5309	47.465	52.2034	1	0	0	1	0	0	0	0	0	1	2	1	1	2	0	0	0	2	1	0	4	1	2	0	2	0	0	0	1	0
465	0	15	0	0	0	59.087	32.8395	59.7028	37.6755	1	0	0	1	0	0	1	0	1	1	3	1	2	1	0	0	3	1	0	0	2	1	1	1	0	0	0	2	1	1
466	0	15	0	0	1	41.6957	48.2716	36.9755	57.046	0	0	0	1	0	0	0	0	1	0	2	1	0	1	2	1	0	1	1	0	2	1	1	0	2	0	0	2	2	1
467	0	15	0	0	0	46.0435	45.1852	43.9685	61.8886	0	0	0	1	0	0	1	0	0	1	3	1	1	0	2	0	1	1	1	1	1	1	2	0	2	0	0	0	2	0
468	0	15	0	1	0	46.0435	-1.11111	31.7308	42.5182	1	0	0	1	1	0	1	1	0	1	1	1	1	1	2	1	1	1	1	1	1	1	1	1	1	1	1	1	1	1
469	0	15	0	1	0	46.0435	54.4444	45.7168	35.2542	0	0	0	0	0	0	0	1	1	1	4	2	1	1	2	0	0	0	1	0	3	0	0	2	2	0	0	0	0	0
470	0	15	0	0	0	63.4348	48.2716	63.1993	42.5182	1	0	0	1	0	0	1	0	1	1	2	1	0	2	2	0	0	1	2	1	2	2	0	0	2	1	0	0	1	1
471	0	15	0	0	0	50.3913	48.2716	43.9685	27.9903	1	0	0	1	0	0	1	1	1	1	2	1	1	1	1	1	0	2	1	0	1	2	3	0	1	0	1	0	1	0
472	1	7	0	0	1	52.1379	30.2195	52.6196	43.6828	1	0	0	1	1	0	0	0	0	1	0	1	0	4	2	0	1	0	0	0	0	0	1	1	2	0	4	0	1	2
474	1	7	0	0	0	38.3448	57.0488	50.3417	38.3065	1	0	0	1	0	0	1	0	1	1	1	1	1	1	2	1	1	1	1	1	1	1	1	1	1	1	1	1	1	1
476	1	9	0	0	0	43.4154	48.3136	33.9348	63.5271	0	0	0	1	0	0	1	0	1	1	1	2	3	1	1	0	2	3	1	0	1	2	0	1	0	0	0	0	1	0
477	1	9	0	0	0	46.4923	39.4379	40.4565	49.9612	0	0	0	0	0	0	0	0	1	1	1	2	1	1	2	0	0	0	2	1	1	1	0	1	2	0	2	0	3	0
478	1	9	0	0	0	43.4154	54.2308	49.1522	59.6512	1	0	0	1	0	0	1	1	1	1	1	1	2	0	1	1	1	1	1	1	1	1	1	2	0	1	1	0	1	1
479	1	10	0	0	1	65.0177	41.8611	62.9067	37.548	1	0	0	0	0	1	1	0	1	1	0	1	1	0	2	0	2	0	1	0	3	1	2	2	1	1	0	0	1	0
480	1	10	0	1	0	40.2827	47.4167	36.8764	56.7377	0	0	0	1	0	1	1	0	0	1	3	1	2	0	1	1	0	0	1	1	1	1	1	1	1	1	2	0	1	0
481	1	11	0	0	1	37.0486	35.2508	42.0222	56.2972	0	0	0	1	0	1	1	0	0	1	1	1	1	2	2	1	1	0	1	0	1	0	2	1	1	1	1	1	1	0
482	1	11	0	0	0	37.0486	35.2508	39.8	63.8539	1	0	0	1	0	0	1	0	0	1	3	1	0	2	2	2	0	0	2	3	1	1	0	2	0	0	0	0	2	0
483	1	11	0	0	0	47.4653	65.3512	37.5778	63.8539	0	0	0	0	0	0	1	0	1	1	1	0	0	3	1	2	4	0	4	0	0	2	0	0	0	1	0	0	0	0
484	1	11	0	0	1	64.8264	31.9064	42.0222	51.2594	0	0	0	0	0	0	0	0	1	1	3	1	2	1	2	0	0	0	3	0	1	0	1	1	3	0	0	0	1	0
485	1	11	0	1	1	37.0486	21.8729	53.1333	48.7406	1	0	0	1	0	1	1	1	1	1	2	0	0	2	2	0	1	0	2	2	1	1	1	2	3	0	0	0	2	0
486	1	11	0	0	0	33.5764	45.2843	59.8	61.335	1	1	1	1	0	0	1	1	1	1	3	1	1	2	1	0	0	1	1	2	1	1	2	0	2	0	1	0	2	0
487	1	11	0	0	0	40.5208	35.2508	48.6889	56.2972	1	0	0	1	0	0	1	1	1	1	0	1	1	0	1	1	0	4	3	2	2	0	0	3	0	0	0	0	2	0
488	1	12	0	0	1	64.1497	26.8502	50.8228	54.9742	0	0	0	0	0	0	1	0	0	0	1	0	2	1	2	2	0	0	1	0	0	1	3	2	2	0	1	0	0	0
489	1	12	0	0	0	40.3401	42.1407	42.384	57.5515	1	1	0	1	0	0	1	0	1	1	1	3	0	0	2	0	0	0	3	0	1	0	2	2	1	0	0	0	3	0
491	1	12	0	0	1	53.9456	17.6758	48.7131	39.5103	1	0	0	1	0	0	1	1	0	1	1	1	1	2	2	0	0	1	2	1	2	1	0	2	0	2	0	0	3	0
492	1	12	0	0	0	50.5442	14.6177	44.4937	36.933	1	0	0	0	0	0	1	1	1	1	1	2	0	2	2	0	1	2	0	3	2	0	0	1	4	0	0	0	2	0
493	1	12	0	0	0	36.9388	5.44343	31.8354	52.3969	0	0	0	1	0	0	1	0	1	1	2	1	1	1	0	2	3	0	1	1	0	1	3	1	1	0	0	0	1	0
494	1	12	0	0	0	40.3401	48.2569	38.1646	57.5515	1	0	0	0	0	0	1	0	0	1	0	2	1	1	0	0	0	0	4	3	1	0	1	1	2	0	0	0	4	0
495	1	13	0	0	0	47.9701	14.2949	37.8416	57.8767	1	0	0	1	0	0	1	0	1	1	1	1	1	1	2	1	1	1	1	1	1	1	1	1	1	1	1	1	1	1
496	1	13	0	0	1	47.9701	49.5513	53.6832	44.1781	0	0	0	0	0	0	1	1	1	1	1	1	2	0	2	0	1	0	3	0	1	0	1	2	0	0	0	0	3	1
497	1	13	0	0	0	42	49.5513	51.703	41.895	0	0	0	1	0	0	1	0	0	1	1	3	4	1	1	1	0	1	0	0	1	0	0	0	1	0	2	0	3	0
498	1	13	0	0	0	50.9552	46.3462	61.604	57.8767	1	0	0	0	0	0	1	0	1	1	3	0	0	4	2	2	3	0	0	0	0	1	3	0	0	0	0	0	0	0
499	1	13	0	1	1	50.9552	43.141	61.604	44.1781	0	0	0	1	0	0	1	0	0	1	1	0	2	1	0	2	1	2	0	1	2	1	1	2	0	0	1	0	3	0
500	1	13	0	0	1	42	43.141	43.7822	41.895	0	0	0	1	0	0	1	0	0	1	2	2	2	1	2	0	0	1	1	1	1	1	1	1	1	1	0	1	0	0
501	1	13	0	0	1	50.9552	46.3462	39.8218	44.1781	1	0	0	1	0	0	1	1	1	1	3	1	0	1	2	0	0	0	4	0	3	0	0	2	2	0	0	0	1	0
502	1	13	0	1	1	59.9104	17.5	65.5644	51.0274	1	0	0	1	0	0	1	1	0	1	1	0	2	0	2	0	3	0	0	2	0	0	3	0	1	3	0	1	0	0
503	1	14	0	0	1	61.25	50.4491	60.7959	37.3203	0	1	0	0	0	0	1	1	0	1	1	2	2	1	2	0	0	1	0	3	2	1	2	0	2	0	0	0	2	0
504	1	14	0	0	0	39.8214	35.479	54.6735	43.8562	1	0	0	0	0	1	1	1	1	1	2	2	1	1	2	1	1	1	1	1	2	1	0	0	2	0	0	1	1	0
505	1	14	0	0	0	64.8214	50.4491	50.5918	59.1068	1	0	0	1	0	0	1	1	0	0	2	1	1	1	0	0	1	1	1	0	0	1	2	3	1	1	2	0	1	0
506	1	14	0	0	0	71.9643	26.497	60.7959	39.4989	0	0	0	1	0	0	1	0	0	1	1	1	1	1	2	1	1	1	1	1	1	1	1	1	1	1	1	1	1	1
507	1	14	0	0	1	61.25	53.4431	62.8367	32.963	1	0	0	1	0	0	1	0	1	1	1	1	2	1	2	0	0	0	2	1	1	2	0	0	2	1	1	0	3	0
508	1	14	0	0	0	61.25	26.497	40.3878	41.6776	1	0	0	0	0	0	0	0	0	1	2	3	1	2	0	0	2	1	0	1	1	2	1	1	1	1	0	0	0	0
509	1	14	0	0	0	54.1071	38.4731	50.5918	39.4989	1	1	0	1	0	0	1	0	1	1	2	1	0	1	0	1	1	0	2	1	2	0	2	2	3	0	0	0	0	1
510	1	15	0	0	0	41.2238	32.0379	43.3794	42.6484	0	0	0	1	0	0	0	0	0	0	2	1	2	0	2	1	1	0	1	0	3	1	0	0	4	0	0	0	0	0
511	1	15	0	0	0	62.2028	62.8436	39.4269	56.347	0	0	0	1	0	0	1	0	1	1	4	4	2	1	2	0	0	0	1	0	2	0	0	0	2	0	0	0	0	0
512	1	15	0	0	0	44.7203	22.5592	49.3083	42.6484	1	0	0	1	0	1	1	0	0	1	2	1	0	1	1	1	2	1	2	1	0	0	0	1	2	1	1	0	2	0
513	1	15	0	0	1	69.1958	58.1043	61.166	44.9315	1	1	0	1	0	0	1	1	0	0	1	2	1	2	1	0	0	2	2	1	0	0	0	1	3	0	0	0	4	0
514	1	15	0	0	0	48.2168	41.5166	43.3794	51.7808	0	1	1	1	0	0	1	0	0	1	2	2	2	1	2	0	0	0	0	4	1	1	1	1	1	1	0	0	1	0
515	0	7	0	0	1	65.3585	26.4898	51.9452	23.4496	0	0	0	0	0	0	0	0	0	0	3	0	0	0	2	0	0	0	0	0	0	0	0	2	3	4	2	0	2	1
516	0	8	0	0	0	54.7739	42.2414	47.8155	43.5127	1	0	0	0	0	1	1	1	1	1	2	2	1	1	2	1	0	0	0	0	0	4	0	1	0	1	0	1	4	0
517	0	8	0	0	1	49.7487	42.2414	50.2427	49.1785	0	0	0	0	0	0	1	0	0	1	1	2	2	1	2	2	1	0	0	0	1	1	3	0	1	0	1	0	2	0
518	0	9	0	0	0	49.7917	40.6688	52.7333	52.9667	0	0	0	0	0	0	1	1	1	1	1	1	2	2	2	1	0	1	0	1	2	1	1	1	0	1	1	0	3	1
519	0	10	0	0	1	56.3182	42.9392	51.7478	53.3333	0	0	0	0	0	1	1	1	0	1	0	1	0	1	1	1	2	0	3	0	1	2	0	2	1	1	0	1	3	0
520	0	10	0	0	0	56.3182	36.1824	53.9602	43.601	0	0	0	0	0	0	1	1	0	1	1	1	1	2	1	1	0	1	1	2	2	3	2	1	1	0	0	1	2	0
521	0	11	0	0	0	47.3264	34.3951	43.1828	53.4653	0	1	0	1	0	0	1	0	1	1	3	2	2	2	1	1	2	1	0	1	0	1	1	1	0	1	0	0	1	0
522	0	11	0	0	1	57.7431	44.2716	45.2361	55.4455	1	1	1	0	1	0	1	1	1	1	1	1	3	1	2	2	1	0	1	1	1	2	1	0	0	2	0	0	2	0
523	0	11	0	0	0	54.2708	49.2099	59.6099	45.5446	0	1	0	1	0	0	1	1	1	1	0	0	3	1	2	1	2	1	1	1	1	1	1	1	1	1	1	1	1	1
524	0	12	0	0	1	48.3256	40.7237	45.0325	49.5116	1	0	1	1	1	0	1	1	0	1	1	1	2	0	0	1	0	0	3	0	0	1	0	0	1	0	1	0	3	1
525	0	12	0	0	0	57.6279	53.8816	47.2017	56.4884	0	0	0	0	0	0	1	1	0	1	1	0	4	3	2	2	0	1	0	1	2	0	0	0	3	1	0	0	3	0
526	0	12	0	0	0	48.3256	53.8816	36.3557	56.4884	1	0	0	0	0	0	1	0	0	1	4	2	2	1	2	0	0	1	1	1	1	3	1	0	0	0	0	0	2	0
528	0	12	0	0	1	57.6279	40.7237	36.3557	42.5349	0	0	0	0	0	0	1	1	0	1	3	1	1	1	2	0	0	0	0	0	0	0	2	0	2	0	2	4	2	0
529	0	12	0	0	0	43.6744	40.7237	53.7093	63.4651	1	0	1	1	0	1	1	0	1	1	1	3	2	1	2	1	0	0	1	0	0	3	1	0	0	0	2	1	2	0
530	0	12	0	0	0	43.6744	30.8553	32.0174	40.2093	0	0	0	1	0	0	0	0	0	1	1	1	0	2	2	2	0	1	0	0	3	1	1	3	1	0	0	1	1	0
531	0	12	0	0	0	39.0233	34.1447	49.3709	47.186	0	0	0	0	0	0	1	0	0	1	2	1	0	2	0	0	0	2	2	0	2	3	0	1	3	1	0	0	2	0
532	0	12	0	1	0	48.3256	53.8816	53.7093	37.8837	1	1	0	1	0	1	1	0	0	0	2	1	1	2	1	1	1	0	2	1	1	2	2	0	0	0	1	1	3	0
533	0	13	0	0	0	48.8028	40.1013	38.81	44.7764	1	1	1	1	0	0	1	1	1	1	2	3	2	1	1	1	0	1	2	1	1	1	0	0	0	0	1	0	4	0
534	0	13	0	0	1	45.2817	24.9114	34.6347	50.874	0	0	0	0	0	0	1	0	0	1	2	2	1	2	2	1	0	0	2	0	0	3	0	2	2	0	0	0	2	0
535	0	13	0	0	0	38.2394	32.5063	53.4238	59.0041	1	1	0	1	0	1	1	0	1	1	1	1	2	2	2	1	1	0	1	1	0	0	0	1	2	0	1	1	3	2
536	0	13	0	0	0	38.2394	47.6962	42.9854	59.0041	0	0	0	1	0	0	1	1	1	1	4	2	0	0	2	1	0	0	2	0	0	0	0	0	1	0	1	2	4	0
537	0	13	0	0	1	55.8451	40.1013	61.7745	34.6138	1	0	0	1	0	0	0	0	0	1	2	2	1	1	2	0	1	1	1	1	1	1	1	1	1	1	0	1	2	0
538	0	13	0	0	1	45.2817	57.8228	61.7745	48.8415	1	1	1	1	0	0	1	0	1	1	3	2	2	1	2	1	0	0	2	1	1	0	1	1	1	1	1	0	1	0
539	0	13	0	0	1	41.7606	45.1646	61.7745	56.9715	1	1	0	1	0	0	1	1	1	0	2	1	2	2	1	2	3	2	1	0	2	0	1	0	0	0	0	0	1	0
540	0	13	0	0	0	48.8028	50.2278	49.2484	48.8415	1	0	0	1	0	1	1	0	1	1	3	2	1	1	2	0	0	0	1	1	2	2	1	0	1	0	1	0	3	0
542	0	14	0	0	0	49.9156	31.0599	38.2041	61.5441	0	0	0	1	0	0	1	1	1	0	3	1	2	2	0	1	0	2	1	0	2	1	0	1	2	0	1	0	0	0
544	0	14	0	0	0	49.9156	42.5806	48.4082	34.5833	1	1	0	1	0	0	1	0	1	1	1	2	3	1	0	0	0	1	2	0	3	1	2	1	1	0	0	0	2	0
545	0	14	0	0	0	54.135	33.3641	56.5714	44.3873	0	1	1	1	0	0	0	0	1	1	2	1	2	0	2	1	0	0	1	2	2	1	2	3	1	0	0	0	1	0
546	0	15	0	0	0	41.6957	32.8395	45.7168	54.6247	0	0	0	1	0	0	1	0	0	1	3	1	1	1	2	0	1	1	1	1	1	0	1	1	2	1	1	1	1	1
547	0	15	0	0	0	54.7391	51.358	59.7028	30.4116	0	1	0	1	0	0	0	0	1	0	0	0	0	3	2	0	1	2	0	3	1	0	4	0	2	0	0	0	0	2
548	0	15	0	0	1	50.3913	45.1852	54.458	40.0969	1	0	0	1	0	0	0	0	1	0	3	2	1	1	2	1	0	0	1	1	2	2	1	0	1	0	0	0	2	1
549	0	15	0	0	1	41.6957	45.1852	50.9615	61.8886	0	0	0	1	0	0	1	1	1	1	2	1	2	1	2	0	0	0	1	1	2	2	1	0	1	1	1	0	3	0
550	1	7	0	0	1	48.6897	32.6585	57.1754	57.1237	1	0	0	0	1	1	1	1	1	1	0	1	1	2	2	0	2	0	1	0	1	2	0	2	1	0	2	2	1	0
552	1	8	0	0	1	46.7893	50.5728	44.631	62.6822	1	0	0	0	0	0	1	1	1	0	2	0	2	2	2	1	2	0	1	3	0	1	2	0	1	0	0	0	0	0
553	1	8	0	0	1	56.8227	38.6396	62.4427	36.4431	0	0	0	0	1	0	1	1	1	1	3	1	1	0	0	0	0	1	1	1	0	4	0	1	2	0	0	0	4	0
555	1	9	0	0	1	46.4923	48.3136	46.9783	57.7132	0	0	0	1	1	0	1	1	0	1	1	3	1	2	4	1	0	1	3	0	0	0	0	1	1	1	0	0	0	0
556	1	9	0	1	0	43.4154	42.3964	55.6739	49.9612	0	0	0	0	0	1	0	1	0	1	0	1	1	0	0	1	3	3	3	1	0	0	0	1	0	2	0	0	0	3
557	1	10	0	0	0	40.2827	47.4167	36.8764	63.1343	0	1	0	1	0	0	0	0	0	0	1	2	2	2	2	1	0	0	0	1	1	2	1	2	1	1	1	0	1	0
558	1	10	0	0	0	40.2827	27.9722	36.8764	46.0768	0	0	0	0	0	0	1	1	1	1	4	3	1	1	1	2	1	0	1	0	1	1	1	0	1	0	0	1	1	0
559	1	10	0	0	1	43.8163	39.0833	49.8915	43.9446	1	0	0	1	0	1	1	0	1	1	1	1	0	2	0	0	2	2	0	2	1	3	0	1	2	1	2	0	1	0
560	1	11	0	0	0	37.0486	41.9398	39.8	56.2972	1	1	0	1	0	1	0	0	1	0	3	2	1	1	2	1	0	0	1	1	0	1	1	1	1	1	2	0	0	0
562	1	11	0	0	0	47.4653	28.5619	48.6889	48.7406	1	0	0	1	0	0	1	0	1	1	3	2	1	2	2	1	0	1	1	1	1	1	2	1	1	0	0	0	1	0
563	1	11	0	0	0	47.4653	25.2174	53.1333	58.8161	1	0	0	0	0	0	0	0	0	1	3	2	2	2	2	1	0	2	1	1	1	0	1	1	0	0	1	0	1	0
565	1	12	0	0	1	77.7551	32.9664	46.6034	42.0876	0	0	0	1	0	0	1	0	1	1	3	2	1	2	2	1	0	1	1	1	1	2	1	1	1	0	0	0	1	0
566	1	12	0	0	0	43.7415	26.8502	38.1646	47.2423	0	0	0	1	0	0	0	0	1	1	0	1	0	0	2	0	3	3	1	0	1	0	0	1	3	0	0	0	1	3
567	1	12	0	0	0	43.7415	42.1407	42.384	47.2423	1	0	0	1	0	0	1	0	0	1	3	2	2	1	2	1	0	1	1	1	1	1	2	1	1	0	0	0	1	0
568	1	12	0	0	0	57.3469	60.4893	67.7004	49.8196	0	0	0	1	0	0	1	1	1	1	1	2	2	1	2	0	0	0	0	3	1	2	0	1	0	1	0	0	4	1
569	1	12	0	0	1	57.3469	39.0826	42.384	42.0876	0	0	0	1	0	0	0	0	1	1	1	0	0	2	2	1	0	3	0	1	1	0	1	2	3	1	2	0	0	0
570	1	12	0	0	0	47.1429	39.0826	48.7131	54.9742	0	0	1	0	0	0	1	0	0	1	3	2	2	1	2	1	1	0	0	0	2	1	0	0	0	1	1	0	3	0
571	1	13	0	0	1	36.0299	43.141	41.802	44.1781	1	0	0	1	0	0	1	0	0	1	2	1	2	2	1	2	0	0	1	1	1	1	1	1	2	2	0	0	1	0
572	1	13	0	0	1	42	43.141	39.8218	71.5753	1	0	0	1	1	1	1	0	1	1	4	2	3	1	0	2	1	1	0	1	1	1	2	0	1	0	0	0	0	0
573	1	13	0	0	0	50.9552	11.0897	43.7822	46.4612	1	1	0	1	0	1	1	1	1	1	3	2	1	2	2	1	1	1	1	1	1	1	1	0	0	0	0	0	4	0
574	1	13	0	0	0	42	36.7308	45.7624	44.1781	0	1	1	1	0	1	1	0	1	1	3	1	2	2	0	2	2	3	0	1	1	0	0	0	2	0	1	0	1	0
575	1	13	0	0	0	47.9701	39.9359	55.6634	51.0274	1	0	0	1	0	1	1	1	1	1	2	2	4	2	2	1	1	0	0	0	0	0	0	0	1	1	1	2	1	1
577	1	13	0	0	0	39.0149	39.9359	53.6832	48.7443	1	1	0	1	0	0	1	1	1	1	1	2	1	3	1	0	0	0	4	1	1	1	1	0	1	1	2	0	2	0
578	1	13	0	0	1	44.9851	55.9615	53.6832	32.7626	1	0	1	1	0	1	1	0	1	1	1	1	0	2	0	0	2	0	2	1	2	1	3	1	1	0	0	0	3	2
579	1	13	0	0	0	42	11.0897	37.8416	51.0274	0	1	0	1	0	0	0	1	1	1	3	1	2	0	2	0	0	1	2	0	0	0	0	1	1	1	1	0	4	0
580	1	13	0	0	1	42	39.9359	49.7228	44.1781	0	0	0	0	0	0	0	0	1	1	1	0	1	1	1	1	0	0	4	1	0	2	4	1	1	0	0	0	2	0
581	1	13	0	0	0	42	52.7564	51.703	57.8767	0	0	0	0	0	1	1	0	1	1	3	2	1	0	2	0	1	0	2	1	2	1	0	2	1	0	1	0	1	0
582	1	14	0	0	1	64.8214	59.4311	60.7959	24.2484	0	0	0	1	0	0	1	0	1	1	1	2	2	1	2	0	0	0	1	0	1	1	1	2	3	0	1	0	2	0
583	1	14	0	0	0	39.8214	35.479	44.4694	56.9281	1	0	0	1	0	1	1	0	0	0	1	2	0	3	0	0	2	1	2	3	1	0	2	0	2	0	1	0	2	0
584	1	14	0	0	0	50.5357	47.4551	42.4286	48.2135	0	0	0	1	0	0	1	0	1	1	3	1	0	1	0	0	0	1	1	0	0	2	1	2	2	0	2	0	4	0
585	1	14	0	0	0	43.3929	47.4551	38.3469	54.7495	1	0	0	1	0	0	1	0	1	1	2	1	1	1	2	1	1	1	1	1	1	1	1	1	1	2	1	0	1	0
586	1	14	0	0	0	43.3929	44.4611	36.3061	59.1068	1	0	0	1	0	0	1	1	1	1	3	2	1	1	2	0	0	1	2	1	1	0	1	1	3	0	0	0	2	0
587	1	14	0	0	0	57.6786	53.4431	38.3469	56.9281	1	0	0	1	0	0	1	0	0	0	1	1	2	1	2	0	1	2	2	1	0	1	2	1	0	2	0	0	0	0
588	1	14	0	0	1	43.3929	35.479	50.5918	46.0349	1	1	1	0	0	0	1	1	1	0	2	0	2	0	2	0	2	1	0	2	1	0	1	4	2	0	0	0	1	0
589	1	15	0	0	1	69.1958	67.5829	71.0474	42.6484	1	0	0	0	0	0	1	0	0	1	2	1	1	1	2	1	1	1	1	1	1	1	1	1	1	1	1	1	1	1
590	0	8	0	0	0	44.7236	47.9885	42.9612	37.847	0	0	0	1	0	1	1	0	1	1	2	0	1	0	2	0	2	1	3	0	1	0	2	0	0	1	2	0	2	1
591	0	8	0	0	0	44.7236	53.7356	42.9612	54.8442	1	0	0	0	0	1	1	0	1	1	4	1	2	2	2	0	0	0	0	0	4	1	2	1	0	0	1	0	1	0
593	0	8	0	0	1	74.8744	30.7471	50.2427	40.6799	0	1	1	1	1	1	0	1	0	0	1	2	0	2	1	1	0	0	2	2	2	1	1	0	1	0	2	0	2	4
594	0	8	0	0	1	44.7236	47.9885	40.534	54.8442	1	1	0	1	0	0	1	0	0	0	2	2	1	1	0	0	2	0	1	0	2	2	0	1	3	1	2	0	1	0
595	0	9	0	0	0	55	53.4076	39.4	42.9667	0	1	0	1	0	1	1	0	0	1	2	1	1	2	0	1	1	0	1	1	2	1	3	0	2	0	1	0	2	2
596	0	9	0	0	1	44.5833	43.8535	72.7333	49.6333	0	1	1	1	0	1	1	1	1	1	0	2	2	2	2	1	1	3	0	2	1	0	0	0	1	2	0	0	1	2
597	0	10	0	0	0	69.9545	29.4257	51.7478	41.1679	1	1	1	1	0	1	1	1	1	1	1	2	1	2	2	1	0	1	0	1	1	1	2	1	1	2	2	0	1	0
598	0	10	0	1	1	56.3182	53.0743	60.5973	48.4672	0	0	0	0	0	0	1	1	0	1	1	3	4	1	0	2	1	0	2	1	2	1	0	0	1	0	1	0	2	0
599	0	10	0	0	0	42.6818	36.1824	47.323	43.601	1	1	0	1	0	1	1	1	1	1	3	2	1	0	2	0	0	1	4	4	1	1	0	1	0	0	1	0	0	0
600	0	10	0	0	0	65.4091	19.2905	60.5973	38.7348	1	1	1	0	0	1	0	0	0	1	1	1	0	2	2	0	1	2	0	2	2	3	2	2	0	1	1	0	2	0
601	0	10	0	0	1	47.2273	39.5608	45.1106	53.3333	1	0	0	0	0	0	1	0	1	0	1	2	3	1	2	1	2	2	1	2	1	0	1	2	0	0	0	0	1	0
602	0	10	0	0	1	47.2273	53.0743	65.0221	46.0341	1	0	0	0	0	1	1	0	0	1	0	2	2	0	2	2	2	0	0	0	2	0	0	2	2	0	2	2	0	2
603	0	11	0	0	0	47.3264	41.8025	57.5565	55.4455	0	1	0	0	1	0	1	0	1	1	2	3	0	1	0	1	1	0	2	1	3	1	2	0	1	0	1	0	3	0
604	0	11	0	0	0	43.8542	22.0494	30.8624	55.4455	0	1	0	0	0	0	0	0	0	0	1	2	2	1	2	1	1	1	2	0	1	1	1	2	2	0	0	0	0	0
605	0	11	0	0	0	47.3264	51.679	45.2361	47.5248	0	0	0	0	0	0	1	1	1	1	1	2	0	1	2	2	2	0	1	0	2	2	1	1	2	1	0	0	0	0
606	0	11	0	0	0	54.2708	36.8642	69.8768	35.6436	0	0	0	1	0	1	1	1	1	1	2	1	4	2	2	1	1	0	0	1	1	4	0	0	1	0	0	0	3	0
607	0	11	0	0	1	50.7986	41.8025	53.4497	35.6436	1	1	1	1	0	0	0	0	1	1	2	1	2	2	1	1	2	0	4	2	1	1	2	0	0	0	0	0	1	0
608	0	12	0	1	1	48.3256	37.4342	40.6941	58.814	1	1	1	1	0	0	1	0	1	1	4	3	2	1	1	1	0	0	1	1	1	1	2	0	0	0	0	2	2	0
609	0	12	0	0	0	39.0233	44.0132	53.7093	33.2326	1	1	1	1	0	0	1	0	1	1	1	0	0	2	2	0	2	2	1	2	2	1	0	4	2	0	0	1	1	0
610	0	12	0	0	0	48.3256	44.0132	53.7093	42.5349	0	0	1	1	0	1	0	0	0	1	3	2	2	1	2	1	1	0	0	0	2	1	1	0	0	1	1	0	3	0
611	0	13	0	0	0	59.3662	42.6329	36.7223	38.6789	1	1	0	1	0	0	1	0	1	1	2	2	2	1	2	1	0	0	2	2	2	1	1	0	0	0	1	0	4	0
612	0	13	0	0	0	45.2817	60.3544	40.8977	63.0691	0	0	0	0	0	0	1	0	0	0	2	1	1	0	2	0	0	1	3	4	1	0	0	1	4	0	0	0	1	0
614	0	13	0	0	1	62.8873	47.6962	38.81	46.8089	0	1	1	1	1	1	0	0	0	0	4	2	1	3	2	0	0	0	1	0	1	3	0	0	3	0	0	0	3	0
615	0	13	0	0	0	55.8451	57.8228	59.6868	44.7764	0	0	0	0	0	1	1	0	1	1	3	1	2	2	2	0	0	1	1	1	1	1	1	2	3	0	0	0	1	0
616	0	13	0	0	1	41.7606	50.2278	42.9854	65.1016	1	0	0	1	0	1	1	0	1	1	3	1	1	1	1	1	1	1	1	1	2	1	2	0	2	0	1	0	2	0
617	0	13	0	0	0	48.8028	52.7595	38.81	52.9065	0	0	0	1	0	0	1	1	1	1	4	2	2	1	2	0	0	0	2	0	1	1	1	0	0	0	1	0	3	1
618	0	13	0	0	1	48.8028	50.2278	55.5115	52.9065	1	1	1	1	0	0	1	1	1	1	1	2	2	1	2	0	1	1	0	3	1	2	1	0	2	0	1	1	0	1
619	0	13	0	0	0	48.8028	32.5063	45.0731	44.7764	1	0	0	0	0	0	1	1	0	1	2	1	0	2	2	0	0	2	0	2	2	1	2	3	3	0	0	0	2	0
620	0	13	0	0	0	52.3239	55.2911	38.81	38.6789	0	0	0	1	0	0	1	1	1	1	3	1	1	2	2	2	1	0	2	0	0	2	1	1	0	2	0	0	0	0
621	0	13	0	1	0	48.8028	45.1646	36.7223	48.8415	0	0	0	0	0	0	1	1	1	0	2	1	2	1	2	0	1	1	2	1	0	1	1	2	1	0	0	0	2	1
622	0	13	0	0	0	38.2394	40.1013	47.1608	44.7764	0	0	0	0	0	0	1	0	0	1	2	3	3	1	1	0	0	1	1	0	2	2	1	0	1	0	1	0	2	0
623	0	13	0	0	0	41.7606	52.7595	38.81	61.0366	1	1	0	1	0	0	1	1	1	1	2	1	3	1	2	1	1	0	0	2	2	1	1	3	1	0	1	0	1	0
624	0	14	0	0	0	45.6962	40.2765	50.449	54.1912	1	0	0	1	0	0	1	0	0	0	2	1	1	3	2	1	0	0	2	1	2	0	1	2	2	0	0	0	2	1
626	0	14	0	0	0	45.6962	44.8848	64.7347	24.7794	1	1	0	1	0	1	1	1	1	1	3	0	1	2	2	2	2	1	0	0	3	0	1	0	3	0	0	0	1	0
628	0	14	0	0	0	49.9156	44.8848	68.8163	27.2304	1	0	0	0	0	1	1	1	1	1	3	2	1	1	0	2	0	0	0	1	1	2	2	0	2	0	1	2	2	2
629	0	14	0	0	0	54.135	54.1014	58.6122	34.5833	0	0	0	1	0	0	0	0	1	1	3	1	1	1	2	0	0	0	1	1	2	2	0	0	1	1	1	2	2	3
630	0	14	0	0	0	41.4768	26.4516	44.3265	49.2892	1	1	0	1	0	0	0	0	0	1	3	1	2	1	0	0	1	0	2	1	0	3	1	1	0	1	2	0	2	0
631	0	14	0	0	1	71.0127	54.1014	54.5306	51.7402	0	1	0	1	0	1	1	0	0	1	2	1	1	2	2	2	0	0	0	2	3	3	1	1	1	0	0	0	3	0
632	0	14	0	0	0	49.9156	49.4931	44.3265	54.1912	0	0	0	1	0	0	1	0	1	1	1	2	2	2	2	0	1	0	1	2	1	2	1	2	2	0	0	0	1	0
633	0	15	0	0	0	41.6957	32.8395	43.9685	57.046	0	0	0	0	0	0	1	0	1	1	2	1	1	2	2	0	1	2	1	1	1	1	1	1	3	0	1	0	1	0
634	0	15	0	1	1	59.087	26.6667	52.7098	37.6755	1	1	0	1	1	1	1	1	1	1	1	2	1	1	1	2	1	1	0	0	1	2	1	1	1	0	2	1	1	2
635	0	15	0	0	0	37.3478	42.0988	38.7238	59.4673	0	1	0	0	0	1	1	0	1	1	3	2	4	1	2	0	1	0	3	1	1	1	1	0	0	0	1	0	1	0
636	1	7	0	0	0	48.6897	44.8537	45.7859	27.5538	1	1	0	0	0	1	1	0	0	1	3	2	1	2	0	0	1	2	4	1	0	0	1	0	1	1	1	0	1	0
637	1	7	0	0	0	62.4828	52.1707	45.7859	43.6828	0	1	1	1	0	0	1	1	1	1	2	1	1	0	2	2	0	2	0	2	1	0	1	2	0	2	0	2	1	0
638	1	7	0	0	0	45.2414	64.3659	64.0091	59.8118	1	0	0	0	0	1	1	1	1	1	2	2	1	1	2	1	0	0	2	2	2	3	1	0	1	0	1	0	2	0
639	1	9	0	0	1	43.4154	48.3136	42.6304	51.8992	0	0	0	1	0	0	1	0	0	1	1	2	1	1	1	0	1	1	1	2	1	1	2	1	1	1	1	0	3	0
640	1	9	0	0	0	58.8	51.2722	42.6304	44.1473	1	0	0	0	0	0	1	0	1	1	4	0	0	1	2	0	0	0	0	1	2	2	0	2	4	1	0	2	1	0
641	1	9	0	0	1	52.6462	54.2308	66.5435	48.0233	0	0	0	0	0	0	1	0	1	1	1	0	1	2	0	0	2	0	0	3	4	3	0	0	4	0	3	0	1	0
643	1	10	0	0	0	40.2827	27.9722	34.7072	52.4733	1	1	1	0	0	0	0	0	0	1	2	1	1	2	2	2	0	2	4	0	0	0	1	2	0	0	1	0	1	0
644	1	10	0	0	0	61.4841	44.6389	54.2299	46.0768	0	0	0	0	0	0	1	1	0	1	3	1	0	1	1	1	0	2	0	0	2	1	3	2	0	0	2	0	2	0
645	1	10	0	0	1	40.2827	36.3056	54.2299	54.6055	0	0	0	0	0	0	1	0	0	1	1	3	1	1	2	0	1	3	1	0	2	0	0	1	0	0	2	0	3	0
648	1	11	0	0	0	43.9931	41.9398	42.0222	63.8539	1	0	0	0	0	0	1	1	1	1	2	1	4	2	0	0	0	0	1	1	0	1	0	4	1	0	3	0	1	0
649	1	11	0	1	1	33.5764	38.5953	55.3556	61.335	0	0	0	0	0	0	1	0	0	1	2	0	0	3	2	0	2	0	2	4	2	1	0	0	2	0	2	0	2	0
650	1	11	0	0	0	43.9931	28.5619	46.4667	51.2594	0	0	0	1	0	0	1	0	0	1	2	1	2	2	0	0	0	2	3	1	1	1	1	2	1	0	0	0	3	1
652	1	12	0	0	0	40.3401	42.1407	42.384	42.0876	0	0	0	1	0	0	0	0	1	0	1	2	1	2	2	0	0	0	2	0	2	1	1	4	2	0	0	0	1	0
653	1	12	0	0	1	36.9388	39.0826	55.0422	57.5515	1	1	1	1	0	1	0	1	0	1	2	1	2	1	2	0	3	1	0	2	0	0	1	1	2	1	1	0	1	0
654	1	12	0	0	0	60.7483	51.315	59.2616	52.3969	0	0	0	0	0	1	1	0	0	1	2	1	1	1	2	0	3	0	0	1	1	1	0	1	1	1	4	1	1	1
655	1	12	0	0	0	33.5374	48.2569	44.4937	44.6649	1	0	0	1	0	0	0	1	1	1	2	1	3	1	2	1	3	0	1	0	1	2	0	1	2	0	0	0	0	0
656	1	12	0	0	0	53.9456	32.9664	59.2616	49.8196	0	0	0	1	0	1	0	0	1	1	1	2	2	1	0	1	0	0	4	1	0	1	3	1	3	0	0	0	1	0
657	1	12	0	0	0	53.9456	26.8502	40.2743	24.0464	1	0	0	1	0	0	1	1	1	1	2	2	1	1	2	0	0	1	1	0	2	2	1	3	1	0	1	0	1	0
658	1	12	0	0	0	36.9388	36.0245	42.384	65.2835	0	0	0	1	0	0	1	1	0	1	3	1	2	1	2	2	0	1	1	2	2	2	1	2	0	0	0	0	1	0
659	1	12	0	1	0	40.3401	32.9664	42.384	36.933	0	0	0	0	0	0	0	0	0	0	2	1	1	2	2	0	0	0	2	1	1	0	2	1	2	1	2	0	1	1
660	1	13	0	0	0	53.9403	33.5256	47.7426	48.7443	0	0	0	1	0	0	0	1	0	0	2	1	1	2	2	2	1	0	1	2	1	0	1	1	1	0	1	0	1	2
661	1	13	0	0	1	47.9701	30.3205	65.5644	60.1598	1	1	0	1	0	0	1	1	1	1	1	0	3	2	0	0	0	3	0	2	2	0	2	2	3	0	2	0	2	0
662	1	13	0	0	0	39.0149	36.7308	71.505	35.0457	1	0	0	1	0	1	1	1	1	1	2	1	1	2	1	1	1	1	1	1	2	1	0	2	2	0	0	2	2	1
663	1	13	0	0	0	39.0149	39.9359	51.703	41.895	1	1	0	1	0	1	1	0	1	1	2	1	1	1	2	2	1	1	1	1	1	1	1	1	1	1	1	1	1	1
665	1	13	0	0	1	56.9254	27.1154	55.6634	55.5936	0	0	0	1	0	0	1	1	1	1	2	1	2	2	2	1	2	1	4	1	1	2	0	0	0	0	0	0	2	0
666	1	13	0	0	1	56.9254	36.7308	57.6436	41.895	0	1	0	1	0	0	1	1	0	1	2	1	1	2	1	3	0	0	0	0	1	2	0	0	1	0	0	4	4	4
667	1	13	0	0	1	42	52.7564	41.802	55.5936	1	0	0	1	0	0	1	1	1	1	3	1	1	1	2	2	0	1	3	1	1	0	2	1	2	0	0	0	1	0
668	1	14	0	0	0	57.6786	56.4371	52.6327	46.0349	1	0	0	1	0	1	1	0	0	0	1	0	0	1	2	2	0	3	1	1	2	1	0	1	1	0	0	4	2	3
669	1	14	0	0	1	43.3929	50.4491	36.3061	63.4641	1	1	0	1	0	0	1	1	1	1	2	1	1	1	2	0	2	0	1	1	2	1	1	0	2	2	0	0	3	0
670	1	14	0	0	1	39.8214	35.479	36.3061	56.9281	1	0	0	1	0	1	1	1	0	1	1	1	0	1	2	1	1	1	1	1	1	1	1	1	1	1	1	0	2	3
671	1	14	0	0	0	46.9643	47.4551	52.6327	46.0349	0	0	0	0	0	0	0	0	1	1	3	2	3	1	2	0	0	0	3	2	0	1	0	0	3	0	0	0	0	0
672	1	14	0	0	0	54.1071	38.4731	54.6735	39.4989	0	0	0	1	0	0	0	1	0	0	1	2	1	2	2	0	1	2	1	1	1	0	0	1	1	2	2	1	0	0
673	1	15	0	0	1	37.7273	43.8863	47.332	51.7808	0	0	0	0	0	0	1	1	1	1	2	1	1	1	0	0	3	1	0	1	1	2	3	0	1	1	0	2	0	3
674	1	15	0	0	0	48.2168	46.2559	45.3557	47.2146	1	0	0	1	0	1	0	1	1	1	1	2	2	1	1	0	1	0	0	1	4	0	2	0	0	1	1	0	4	1
675	1	15	0	0	0	34.2308	46.2559	49.3083	40.3653	1	1	0	1	0	0	0	0	1	1	1	1	1	2	2	0	2	1	4	2	2	1	0	1	2	0	0	0	0	0
676	0	7	0	0	0	57.8113	50.9796	51.9452	19.5736	1	0	0	1	0	0	1	0	0	1	2	3	1	1	0	1	0	0	1	0	2	1	0	1	4	2	1	0	2	0
677	0	9	0	0	0	44.5833	50.2229	48.2889	62.9667	0	1	1	0	0	1	1	0	0	1	2	2	3	1	1	1	0	0	1	1	2	1	2	4	0	1	0	0	1	0
678	0	9	0	0	0	55	59.7771	52.7333	56.3	1	0	0	0	0	1	1	1	0	1	2	3	0	2	2	0	2	0	2	0	1	2	1	0	1	0	1	0	3	1
679	0	9	0	0	1	70.625	43.8535	68.2889	16.3	1	1	1	1	1	1	1	0	1	1	2	0	2	3	2	0	2	3	0	0	0	1	2	0	1	2	0	1	1	0
680	0	9	0	0	0	75.8333	56.5924	52.7333	39.6333	0	0	0	1	0	1	0	0	0	1	3	2	1	2	2	0	0	0	4	0	2	4	0	0	0	0	0	0	3	0
681	0	9	0	1	1	75.8333	34.2994	59.4	49.6333	0	0	0	1	0	1	1	0	1	1	1	1	0	2	1	1	0	1	2	1	2	1	0	2	1	0	1	4	3	4
682	0	10	0	0	1	60.8636	53.0743	62.8097	46.0341	0	0	0	1	0	1	1	0	1	1	1	3	1	2	2	0	0	1	2	0	1	1	2	2	1	2	0	0	1	0
683	0	10	0	0	0	47.2273	46.3176	47.323	43.601	0	0	0	0	0	1	1	1	0	0	3	1	2	0	1	1	0	0	4	0	2	2	1	1	0	3	0	0	0	0
684	0	10	0	0	1	60.8636	29.4257	47.323	50.9002	0	0	0	0	0	1	1	0	0	1	1	2	1	2	2	1	1	1	1	1	1	2	1	1	1	2	1	0	1	0
685	0	11	0	0	1	47.3264	56.6173	43.1828	61.3861	0	0	0	0	0	0	0	1	0	0	1	1	1	2	0	3	4	3	0	1	0	1	0	0	0	0	1	2	3	0
686	0	11	0	0	1	43.8542	41.8025	45.2361	57.4257	1	1	0	0	0	0	0	1	1	1	3	2	2	1	2	1	0	0	1	2	1	4	1	0	1	0	0	1	1	0
687	0	11	0	1	1	47.3264	41.8025	49.3429	43.5644	0	1	0	0	0	1	1	0	1	1	3	2	2	0	2	1	1	0	0	1	1	0	0	4	1	0	1	1	0	3
688	0	11	0	0	0	50.7986	44.2716	53.4497	43.5644	1	1	1	1	0	0	1	1	1	1	1	1	1	1	2	1	0	1	2	0	2	1	1	1	2	1	2	0	2	0
689	0	11	0	0	1	50.7986	46.7407	51.3963	47.5248	1	0	0	1	0	0	0	1	1	1	3	1	1	1	2	1	1	1	0	1	2	2	2	1	1	1	0	1	1	0
690	0	12	0	0	1	43.6744	50.5921	38.5249	63.4651	0	1	0	1	0	0	1	0	1	1	3	2	4	1	2	1	0	0	1	2	1	2	1	0	1	0	1	0	1	0
691	0	12	0	0	1	57.6279	57.1711	47.2017	56.4884	0	0	0	0	0	0	1	0	1	1	3	0	2	1	2	1	2	0	2	1	0	3	3	0	1	0	0	0	0	0
692	0	12	0	0	0	57.6279	27.5658	49.3709	33.2326	1	1	0	1	0	0	1	1	1	0	2	2	1	2	2	1	0	2	0	1	1	2	0	1	2	0	2	1	2	0
693	0	12	0	0	1	43.6744	17.6974	64.5553	30.907	1	0	0	1	0	0	1	0	1	1	2	2	1	2	2	1	0	2	0	1	1	2	0	1	2	0	2	1	2	0
694	0	13	0	0	0	48.8028	55.2911	57.5992	46.8089	0	1	0	0	0	1	1	1	1	1	3	1	3	1	2	1	1	0	0	1	1	2	1	1	1	1	1	0	2	0
695	0	13	0	0	1	62.8873	40.1013	59.6868	40.7114	0	1	0	1	1	1	0	0	1	0	4	3	2	1	2	1	0	0	1	1	1	1	2	0	0	0	0	2	2	0
696	0	13	0	0	0	55.8451	50.2278	49.2484	59.0041	0	1	0	1	1	0	1	0	1	1	2	2	2	1	2	0	0	0	4	0	0	1	1	2	1	1	1	0	2	0
697	0	13	0	0	0	41.7606	50.2278	47.1608	56.9715	1	1	0	1	0	0	1	1	1	1	4	3	2	1	2	1	0	0	4	0	0	0	1	0	0	0	2	0	2	0
698	0	13	0	0	0	45.2817	32.5063	53.4238	46.8089	1	0	0	1	0	1	1	0	1	1	3	1	1	2	2	2	0	0	0	0	1	1	2	1	2	2	1	0	1	0
699	0	13	0	0	1	48.8028	52.7595	55.5115	34.6138	0	0	0	1	0	0	1	1	1	1	2	1	3	1	1	1	0	0	0	2	4	1	0	0	0	0	0	1	4	4
700	0	13	0	0	0	45.2817	47.6962	42.9854	56.9715	1	0	0	1	0	0	1	0	1	1	1	2	1	2	2	0	1	0	1	1	2	1	2	0	1	1	2	0	0	2
701	0	13	0	0	0	41.7606	52.7595	32.547	50.874	0	0	0	0	0	0	1	1	0	1	1	2	3	2	2	1	2	0	1	2	1	1	1	1	1	1	0	0	0	0
702	0	14	0	0	0	54.135	58.7097	36.1633	44.3873	0	0	0	1	0	1	0	0	0	1	3	2	2	1	2	1	1	0	2	0	1	1	1	1	1	1	0	0	2	0
703	0	14	0	0	1	45.6962	61.0138	50.449	32.1324	0	0	0	0	0	0	0	0	0	0	3	1	3	1	1	1	0	0	2	0	0	3	1	2	2	1	0	0	0	0
704	0	14	0	0	0	41.4768	42.5806	40.2449	61.5441	1	0	0	1	0	0	1	0	0	1	3	2	2	1	2	0	1	1	0	2	1	2	2	1	1	0	1	0	1	0
705	0	14	0	0	1	45.6962	44.8848	56.5714	39.4853	0	0	1	1	0	0	1	0	0	0	1	1	2	1	2	0	1	0	0	0	2	2	1	1	2	0	1	0	4	1
706	0	14	0	0	0	49.9156	56.4055	44.3265	56.6422	1	0	1	1	0	1	1	1	1	1	4	2	2	1	2	1	0	2	3	0	1	0	1	0	0	0	1	0	2	0
707	0	14	0	0	0	37.2574	42.5806	48.4082	44.3873	1	0	0	1	0	0	1	1	1	1	3	1	0	1	0	0	1	0	4	1	2	2	1	0	2	0	0	2	3	1
708	0	14	0	0	0	45.6962	37.9724	46.3673	46.8382	1	0	0	1	0	0	1	1	1	1	2	1	1	1	2	1	0	1	1	2	2	1	1	1	2	1	2	0	2	0
709	0	15	0	0	0	41.6957	57.5309	35.2273	57.046	0	0	0	0	0	0	0	0	1	1	4	2	3	1	2	0	0	0	1	0	4	2	0	1	0	1	0	0	1	0
710	0	15	0	0	0	41.6957	45.1852	50.9615	57.046	1	0	0	1	0	1	0	1	1	1	3	2	1	2	1	1	1	0	0	2	2	1	3	2	1	0	1	0	1	0
711	0	15	0	0	0	37.3478	48.2716	47.465	52.2034	0	0	0	1	0	0	0	1	1	1	4	1	2	1	0	0	1	0	0	1	4	1	2	0	2	0	0	0	4	0
712	0	15	0	0	0	59.087	32.8395	59.7028	44.9395	1	1	1	1	0	1	0	1	0	1	1	0	0	3	1	1	1	2	1	2	1	2	1	1	3	0	0	2	2	2
713	0	15	0	0	0	85.1739	48.2716	61.451	47.3608	1	0	0	1	0	0	1	1	0	1	1	2	3	3	1	0	0	0	1	0	0	0	1	2	4	0	0	2	4	0
714	0	15	0	0	0	50.3913	29.7531	49.2133	57.046	0	0	0	0	0	0	1	0	1	1	2	1	1	2	2	1	2	2	0	1	1	1	1	2	2	0	0	1	1	0
715	0	15	0	0	1	46.0435	42.0988	42.2203	59.4673	0	0	0	0	0	0	1	1	0	0	4	1	0	0	2	2	1	0	0	0	1	4	0	1	2	0	0	0	2	1
716	0	15	0	0	0	80.8261	35.9259	52.7098	37.6755	0	0	0	0	0	1	0	0	0	0	2	0	1	3	2	1	2	2	0	3	2	1	3	0	1	0	0	0	0	0
717	1	7	0	0	0	48.6897	49.7317	52.6196	43.6828	1	0	0	1	0	0	1	1	0	1	3	2	1	2	2	0	0	1	4	1	2	0	1	0	2	1	0	0	1	0
718	1	8	0	0	1	80.2341	50.5728	44.631	33.5277	0	1	0	1	0	0	1	0	1	1	2	1	0	2	3	2	0	0	0	1	1	0	2	0	1	1	2	0	1	4
719	1	8	0	1	0	43.4448	52.9594	39.542	56.8513	0	0	0	0	0	1	0	0	0	1	0	1	1	0	0	2	3	3	3	1	0	1	0	1	0	2	0	0	0	3
720	1	8	0	1	0	46.7893	26.7064	47.1756	53.9359	0	0	0	0	0	0	1	0	0	1	1	0	0	3	2	1	4	4	0	3	0	0	1	0	1	0	0	0	0	1
721	1	8	0	0	0	46.7893	48.1862	47.1756	59.7668	1	0	0	1	0	1	1	1	1	1	1	2	0	0	0	1	0	2	1	0	4	0	0	3	0	1	4	0	2	0
722	1	9	0	0	1	64.9538	39.4379	55.6739	44.1473	1	0	0	0	0	0	1	1	1	1	0	1	2	1	2	0	0	0	1	1	1	2	0	2	3	2	0	2	3	2
723	1	9	0	0	1	49.5692	36.4793	49.1522	51.8992	1	0	0	0	0	0	1	0	0	1	1	0	2	0	2	2	0	2	0	2	1	0	2	0	1	1	2	0	1	3
724	1	9	0	0	1	58.8	36.4793	51.3261	48.0233	1	0	0	1	0	0	0	0	1	1	1	2	0	0	2	1	0	0	0	1	0	1	4	2	1	1	0	0	4	1
725	1	9	0	0	0	46.4923	36.4793	44.8043	46.0853	1	0	0	0	0	0	1	0	1	1	3	1	1	1	2	1	1	0	0	0	0	0	0	4	0	4	0	0	4	0
726	1	10	0	0	1	68.5512	50.1944	52.0607	56.7377	1	0	0	0	0	1	1	0	1	1	1	2	2	1	2	1	1	2	1	2	1	1	0	1	1	1	2	0	1	0
727	1	10	0	0	0	50.8834	36.3056	54.2299	46.0768	0	0	1	1	0	0	0	1	0	1	1	0	1	1	1	1	1	1	1	0	0	2	3	1	2	4	0	0	2	0
728	1	10	0	0	1	61.4841	33.5278	71.5835	61.0021	0	0	0	0	0	1	1	1	1	1	0	0	0	0	2	0	1	1	2	0	1	1	2	3	0	1	2	0	2	3
729	1	10	0	0	0	47.3498	50.1944	56.3991	52.4733	0	0	0	0	0	0	1	0	1	1	3	0	1	0	2	0	0	0	0	4	1	0	0	4	2	1	1	2	1	0
730	1	10	0	0	0	47.3498	50.1944	39.0456	63.1343	0	0	0	0	0	1	1	1	1	1	1	2	2	1	2	1	0	1	2	2	1	1	2	2	1	1	0	0	1	0
731	1	10	0	0	0	36.7491	50.1944	39.0456	58.8699	1	1	1	1	0	0	1	1	0	1	2	1	2	1	1	1	0	1	3	0	2	1	0	2	1	1	1	0	2	0
732	1	10	0	0	0	43.8163	41.8611	43.3839	37.548	1	1	0	1	0	1	1	1	1	1	2	2	1	1	1	1	1	2	1	2	0	1	1	1	1	1	0	0	3	0
733	1	11	0	0	1	54.4097	31.9064	66.4667	46.2217	0	0	0	0	0	1	1	1	1	1	1	1	1	3	1	2	2	1	1	1	1	1	2	1	1	1	1	0	1	0
734	1	11	0	0	1	43.9931	28.5619	46.4667	48.7406	1	0	0	1	0	1	0	1	1	1	3	2	1	1	1	0	1	0	2	1	1	1	1	0	2	1	0	1	4	0
735	1	12	0	0	0	43.7415	32.9664	55.0422	44.6649	0	0	0	0	0	0	1	1	1	1	1	1	0	2	2	0	2	0	4	1	0	1	0	4	1	2	0	0	1	0
736	1	12	0	0	0	40.3401	57.4312	46.6034	62.7062	0	0	0	1	0	0	1	1	1	1	2	1	2	0	0	1	0	0	1	1	0	0	1	0	2	0	2	4	4	1
737	1	12	0	0	1	67.551	32.9664	59.2616	44.6649	1	1	0	1	0	0	1	0	0	0	1	4	3	1	2	0	0	2	0	2	1	0	1	2	1	1	1	0	0	0
738	1	12	0	0	1	60.7483	26.8502	50.8228	47.2423	1	0	0	0	0	0	1	1	1	1	4	0	1	0	2	3	1	2	3	1	2	0	2	0	1	0	0	0	0	0
740	1	12	0	0	0	33.5374	23.792	33.9451	42.0876	0	0	0	1	0	0	0	0	1	1	2	1	1	0	2	0	1	0	4	1	3	1	0	3	1	1	0	0	1	0
741	1	12	0	0	1	40.3401	39.0826	48.7131	60.1289	1	0	0	1	0	1	1	0	0	1	3	1	0	0	2	0	0	0	4	0	4	1	0	1	4	0	0	0	1	0
742	1	12	0	1	0	64.1497	54.3731	52.9325	39.5103	0	0	0	1	0	0	1	0	0	1	2	3	1	1	2	0	0	0	0	3	1	3	0	0	4	2	0	0	0	0
743	1	12	0	0	1	36.9388	54.3731	52.9325	70.4381	0	0	0	0	0	0	1	0	1	1	0	2	1	2	0	0	2	1	1	2	2	1	2	1	3	2	1	0	2	0
744	1	12	0	0	0	57.3469	45.1988	61.3713	39.5103	0	0	0	1	0	0	1	1	1	1	3	0	1	0	1	0	0	0	3	4	0	1	2	4	0	0	0	0	2	0
745	1	12	0	0	0	67.551	48.2569	50.8228	52.3969	0	0	0	0	0	0	1	0	1	0	2	0	1	1	2	1	0	1	1	2	0	1	2	0	1	2	3	0	0	1
746	1	13	0	0	0	39.0149	39.9359	37.8416	64.726	1	0	0	1	0	1	1	1	1	1	2	2	2	1	2	1	1	0	1	0	2	1	0	2	2	1	0	0	2	0
747	1	13	0	0	0	44.9851	27.1154	49.7228	53.3105	1	1	0	1	0	1	1	1	1	1	1	1	1	1	2	1	0	1	1	0	1	2	1	0	0	2	1	0	3	3
749	1	13	0	0	0	56.9254	43.141	57.6436	44.1781	1	1	0	1	0	0	1	0	1	1	2	1	1	2	2	1	0	2	1	0	2	0	1	0	3	0	0	3	0	3
750	1	13	0	0	0	44.9851	62.3718	37.8416	67.0091	0	0	0	1	0	0	1	0	1	1	4	1	4	0	0	4	0	0	0	0	3	0	0	0	1	0	0	0	4	0
751	1	14	0	0	0	79.1071	41.4671	50.5918	46.0349	1	0	0	1	0	0	1	0	1	1	2	3	1	2	0	1	0	0	2	0	3	1	0	2	2	1	0	0	3	0
752	1	14	0	0	0	46.9643	50.4491	42.4286	54.7495	0	0	0	1	0	1	1	0	1	1	4	0	1	1	2	0	4	0	1	0	0	0	0	2	4	1	0	0	2	0
753	1	14	0	0	0	54.1071	53.4431	36.3061	54.7495	1	1	0	1	0	0	1	0	1	1	1	2	1	1	2	1	1	2	1	2	2	1	2	0	1	1	1	0	2	0
755	1	14	0	0	1	82.6786	38.4731	44.4694	46.0349	1	0	1	1	0	1	1	1	1	1	1	2	1	0	0	1	0	3	0	2	0	1	2	1	4	3	0	0	0	0
756	1	14	0	0	0	46.9643	17.515	54.6735	39.4989	1	0	0	0	0	0	0	0	0	1	2	1	1	1	2	0	1	1	1	1	1	3	1	1	2	1	0	1	2	1
757	1	14	0	0	0	71.9643	47.4551	54.6735	30.7843	0	0	0	1	0	0	0	0	1	1	1	1	1	1	2	0	0	1	1	1	2	1	1	1	4	1	1	2	0	2
758	1	15	0	0	0	55.2098	39.1469	45.3557	51.7808	1	0	0	0	0	0	1	0	1	1	2	2	2	1	1	1	2	1	1	2	1	1	0	0	1	0	2	0	3	0
759	1	15	0	0	1	44.7203	65.2133	39.4269	56.347	0	1	0	1	0	1	1	1	1	1	2	3	1	1	2	2	0	1	3	3	1	0	1	0	1	1	0	0	1	0
761	1	15	0	0	0	48.2168	39.1469	43.3794	44.9315	1	0	0	1	0	0	1	0	1	1	2	2	1	1	0	1	1	0	1	3	2	1	0	3	2	2	1	0	1	0
762	1	15	0	0	1	51.7133	65.2133	55.2372	40.3653	1	0	0	1	0	1	1	1	1	1	2	2	0	1	2	0	0	0	1	1	2	1	3	0	3	0	3	0	2	0
763	1	15	0	0	0	72.6923	41.5166	47.332	42.6484	1	0	0	1	0	1	1	0	1	1	2	2	2	2	2	1	0	0	4	0	1	0	1	2	1	1	0	0	2	0
764	1	15	0	0	1	48.2168	53.3649	63.1423	42.6484	1	1	0	0	0	0	1	1	1	1	1	1	0	3	2	0	1	0	0	1	1	3	3	3	2	0	0	0	1	1
765	0	7	0	0	0	69.1321	34.6531	54.6849	27.3256	1	0	0	0	0	0	1	0	0	1	1	2	2	1	2	2	1	0	0	1	1	2	1	2	1	0	2	1	2	1
766	0	8	0	0	1	49.7487	45.1149	57.5243	43.5127	1	0	1	0	0	1	0	1	1	1	2	3	1	0	0	0	2	2	0	1	0	2	2	1	2	2	1	1	0	0
767	0	8	0	0	1	49.7487	39.3678	57.5243	52.0113	0	1	0	0	0	1	1	0	0	1	2	1	2	0	2	0	2	1	4	3	1	1	0	1	2	1	0	0	0	0
768	0	9	0	0	0	49.7917	53.4076	50.5111	12.9667	1	0	0	0	0	0	1	0	1	1	2	2	3	1	2	0	1	0	4	0	1	2	0	0	0	2	0	0	3	0
769	0	9	0	0	0	55	53.4076	57.1778	56.3	0	0	1	1	0	1	1	0	1	0	4	2	3	1	2	0	0	0	1	2	0	2	1	0	1	2	1	0	1	0
770	0	10	0	0	1	88.1364	46.3176	76.0841	53.3333	0	0	0	0	0	0	1	0	1	1	2	0	0	2	2	2	2	0	0	0	2	2	2	2	0	2	0	2	2	0
771	0	10	0	0	0	47.2273	36.1824	65.0221	31.4355	0	0	0	1	0	0	1	1	0	0	1	3	1	0	1	2	1	3	1	2	1	3	0	2	0	0	0	2	0	0
772	0	10	0	1	1	79.0455	42.9392	53.9602	43.601	0	0	0	0	0	0	1	1	0	1	2	1	0	2	2	0	1	0	2	0	0	1	2	1	0	2	4	0	0	2
773	0	10	0	0	1	79.0455	42.9392	56.1726	38.7348	1	1	0	1	0	1	1	1	0	1	1	2	2	2	0	0	1	0	2	1	1	1	3	1	2	1	0	1	3	2
774	0	11	0	0	1	47.3264	39.3333	45.2361	57.4257	1	0	1	0	0	1	1	0	1	1	0	2	0	2	2	0	2	1	0	1	3	0	1	2	4	0	0	0	4	1
775	0	11	0	0	0	40.3819	41.8025	41.1294	53.4653	0	0	0	1	0	0	1	1	1	1	1	3	2	1	2	2	0	1	0	0	0	4	0	4	0	1	0	1	1	1
776	0	11	0	0	0	50.7986	31.9259	51.3963	39.604	0	0	0	0	0	1	1	0	1	1	1	2	3	0	2	0	0	3	4	3	0	1	0	0	1	0	1	0	1	0
777	0	12	0	0	0	52.9767	17.6974	58.0477	47.186	1	0	0	0	0	1	1	1	1	0	2	3	0	0	2	1	0	0	2	1	2	4	0	1	2	0	0	0	3	0
778	0	12	0	0	0	43.6744	53.8816	45.0325	61.1395	1	0	0	1	0	1	1	0	0	1	1	2	2	1	1	2	0	0	2	1	2	2	2	0	2	1	1	0	2	0
780	0	12	0	0	1	43.6744	34.1447	64.5553	56.4884	1	0	0	1	0	1	1	0	1	1	1	0	0	1	2	1	0	0	0	3	1	4	3	4	0	0	0	0	4	0
782	0	12	0	0	0	52.9767	44.0132	53.7093	58.814	0	0	0	1	0	0	1	1	1	1	2	2	2	2	2	2	0	0	0	0	0	3	1	3	0	0	0	2	3	1
783	0	12	0	0	1	57.6279	34.1447	51.5401	47.186	0	0	0	1	0	1	1	1	1	1	3	2	0	1	2	0	1	3	2	1	0	1	1	0	1	1	1	1	0	2
784	0	12	0	0	0	48.3256	44.0132	42.8633	49.5116	0	0	0	1	0	0	1	1	1	1	4	2	1	3	1	0	0	1	4	1	2	1	0	1	0	1	0	0	4	0
785	0	12	0	1	0	43.6744	34.1447	55.8785	56.4884	1	1	0	1	0	1	1	0	1	1	4	2	2	2	2	0	1	0	0	0	2	1	1	1	1	1	1	0	3	0
786	0	13	0	0	0	45.2817	40.1013	40.8977	54.939	0	0	0	1	0	0	1	0	1	0	2	1	1	1	2	0	1	0	2	0	2	1	2	3	2	0	0	0	3	0
787	0	13	0	0	0	52.3239	47.6962	45.0731	54.939	1	0	0	1	0	0	1	0	0	1	3	2	1	1	2	1	0	1	2	1	1	1	0	3	0	1	1	0	3	0
788	0	13	0	0	0	45.2817	35.038	42.9854	59.0041	1	0	0	1	0	1	1	0	1	1	1	2	1	1	2	1	1	2	1	0	1	1	2	1	1	0	0	1	4	0
789	0	13	0	0	1	52.3239	35.038	53.4238	42.7439	1	0	0	1	0	0	1	1	0	1	3	0	1	2	0	0	0	4	0	0	2	0	4	3	0	2	0	0	3	0
790	0	13	0	0	0	41.7606	42.6329	57.5992	30.5488	1	0	0	1	0	0	0	0	1	1	1	1	1	3	2	0	0	1	2	3	2	1	1	2	1	1	0	0	2	2
791	0	13	0	0	0	38.2394	55.2911	34.6347	61.0366	0	0	0	0	0	0	1	0	0	1	1	2	4	1	2	0	0	0	4	0	3	0	0	1	0	2	0	0	3	0
792	0	13	0	0	1	48.8028	42.6329	59.6868	44.7764	0	0	0	1	0	1	1	0	1	1	3	2	2	2	0	1	1	0	1	2	1	1	1	2	2	1	1	0	2	0
793	0	13	0	0	0	45.2817	60.3544	42.9854	54.939	1	0	0	1	0	0	1	1	1	1	4	2	1	2	2	0	0	1	0	1	2	3	0	2	3	0	0	0	1	0
794	0	13	0	0	0	38.2394	62.8861	42.9854	46.8089	0	1	0	1	0	0	1	0	0	1	3	2	1	1	1	1	0	0	2	0	4	2	0	3	0	0	0	0	3	0
795	0	13	0	0	0	41.7606	52.7595	57.5992	59.0041	0	0	0	0	0	0	1	0	0	0	1	2	3	1	2	1	0	0	1	2	1	0	1	1	4	0	1	0	3	0
796	0	13	0	0	1	45.2817	50.2278	49.2484	50.874	1	0	0	0	0	0	1	1	1	1	2	1	1	1	2	1	1	2	2	1	1	1	1	1	1	2	0	2	0	2
797	0	14	0	0	0	45.6962	31.0599	66.7755	32.1324	1	0	0	1	0	0	1	0	1	1	3	1	0	3	2	0	1	2	0	1	1	3	4	0	1	1	0	0	1	0
798	0	14	0	0	1	45.6962	51.7972	38.2041	46.8382	1	0	0	1	0	0	1	1	1	1	2	1	1	0	2	1	0	1	2	1	1	1	1	2	1	1	2	1	2	1
799	0	14	0	0	0	54.135	35.6682	48.4082	49.2892	1	0	0	1	0	1	1	1	1	0	2	2	0	2	2	0	0	0	4	1	2	1	2	0	3	1	0	0	2	1
800	0	14	0	0	1	45.6962	49.4931	40.2449	63.9951	1	1	1	1	0	0	1	1	1	1	2	2	2	1	2	1	0	0	2	0	2	3	2	1	1	0	1	0	1	0
802	0	15	0	0	0	54.7391	35.9259	54.458	37.6755	1	0	0	1	0	0	1	1	1	1	3	2	1	3	0	1	0	3	0	1	0	2	1	0	4	0	0	0	0	1
803	0	15	0	0	0	67.7826	48.2716	50.9615	27.9903	1	0	0	1	0	0	1	0	1	1	3	2	1	1	0	0	1	0	4	0	2	1	2	1	2	0	0	0	2	1
804	0	15	0	0	1	85.1739	57.5309	61.451	32.8329	1	0	0	0	1	0	1	1	1	1	1	0	0	1	2	0	1	1	2	1	1	2	2	1	4	1	0	1	3	0
805	0	15	0	0	0	72.1304	57.5309	56.2063	44.9395	1	0	0	1	0	0	0	0	1	1	2	1	1	2	2	1	0	0	1	1	1	1	1	1	2	3	1	0	4	0
807	1	7	0	0	0	72.8276	57.0488	54.8975	40.9946	0	1	0	0	0	0	0	0	0	0	1	1	1	2	2	4	0	0	1	2	0	0	0	4	0	4	0	0	0	0
808	1	8	0	0	1	66.8562	43.4129	42.0865	33.5277	0	0	0	1	0	0	1	1	0	0	2	1	1	2	2	0	1	1	0	1	2	1	4	1	2	0	1	0	1	1
809	1	9	0	0	0	80.3385	66.0651	81.7609	44.1473	1	0	0	0	0	1	1	1	0	1	0	0	1	1	2	1	1	2	4	1	2	4	1	1	1	0	0	1	1	1
810	1	9	0	0	1	52.6462	42.3964	55.6739	46.0853	0	0	1	0	0	0	0	0	1	1	3	4	0	1	1	1	1	1	1	2	1	1	1	1	1	1	1	0	0	1
812	1	10	0	0	1	47.3498	36.3056	47.7223	58.8699	0	0	1	0	0	0	1	1	0	0	2	0	3	0	1	0	0	1	0	4	1	0	2	0	1	0	2	0	4	2
813	1	10	0	0	0	40.2827	47.4167	52.0607	58.8699	0	1	1	1	0	0	1	1	1	1	1	2	3	1	2	1	0	1	0	0	1	0	1	4	2	0	0	0	4	0
814	1	10	0	0	0	43.8163	41.8611	43.3839	54.6055	0	0	0	1	0	0	1	0	1	1	1	0	1	1	0	1	2	1	4	3	1	2	1	3	0	0	0	0	3	0
815	1	10	0	0	1	50.8834	33.5278	56.3991	50.3412	1	0	0	0	0	1	1	0	1	1	2	0	0	2	2	0	2	1	2	3	1	2	1	0	1	0	2	0	4	0
816	1	11	0	1	1	43.9931	25.2174	62.0222	46.2217	0	0	0	1	0	0	1	0	1	1	2	1	1	0	0	0	0	1	3	3	4	2	3	2	2	0	0	0	1	0
817	1	11	0	0	0	43.9931	41.9398	46.4667	48.7406	1	0	0	0	0	0	1	0	1	1	2	1	1	1	2	1	1	2	4	1	0	0	1	1	1	1	0	0	3	0
818	1	11	0	0	1	54.4097	25.2174	57.5778	46.2217	0	1	0	1	0	0	0	0	0	1	0	1	0	1	2	1	2	0	3	0	1	0	2	1	2	3	1	0	1	2
819	1	11	0	0	1	57.8819	41.9398	62.0222	38.665	1	0	0	0	0	1	1	0	0	1	2	1	2	2	2	1	1	0	3	2	1	1	1	2	1	0	1	0	1	0
820	1	12	0	0	0	47.1429	36.0245	33.9451	49.8196	1	1	1	1	0	1	0	0	1	0	1	2	1	1	2	1	1	1	2	1	1	1	1	2	1	1	1	1	2	1
821	1	12	0	1	0	47.1429	48.2569	65.5907	57.5515	0	1	0	1	0	0	1	1	0	1	1	1	0	4	2	2	0	0	1	0	4	1	0	2	4	0	0	0	1	0
822	1	12	0	0	1	36.9388	39.0826	46.6034	60.1289	1	1	0	1	0	0	1	1	1	0	2	0	2	0	2	0	0	1	2	3	1	2	0	4	0	0	0	0	4	0
823	1	12	0	0	0	50.5442	23.792	55.0422	44.6649	1	0	0	1	1	0	1	0	1	1	2	1	1	0	2	0	1	1	3	0	0	1	1	1	0	1	3	1	3	1
824	1	12	0	0	1	40.3401	39.0826	48.7131	67.8608	1	0	0	1	0	0	1	1	1	1	2	1	2	1	1	1	1	1	2	2	1	1	1	2	1	1	0	1	2	1
825	1	13	0	0	1	47.9701	27.1154	71.505	57.8767	1	1	1	1	0	0	0	0	0	0	1	1	0	2	2	1	0	2	0	4	1	1	2	1	3	0	0	1	1	2
826	1	13	0	0	0	42	33.5256	47.7426	44.1781	0	0	0	1	0	0	1	1	0	1	2	2	1	3	0	1	2	1	2	2	2	2	1	1	1	0	0	0	2	1
827	1	13	0	0	1	53.9403	43.141	41.802	37.3288	1	0	0	1	0	0	0	1	1	0	2	1	1	1	2	1	0	0	1	0	3	1	1	2	3	0	0	0	4	0
828	1	14	0	0	0	61.25	23.503	54.6735	32.963	0	0	0	1	0	0	1	0	1	1	2	1	1	2	0	1	2	0	0	1	3	1	0	3	3	0	0	2	1	3
829	1	14	0	0	0	57.6786	32.485	50.5918	48.2135	1	1	0	1	0	1	0	0	1	1	2	3	3	1	2	1	0	1	3	1	2	1	1	2	0	0	0	0	0	0
830	1	14	0	0	1	43.3929	47.4551	42.4286	46.0349	1	0	0	1	0	0	1	0	0	1	3	2	2	2	0	0	0	0	2	1	2	1	1	1	1	2	0	2	3	0
831	1	14	0	0	0	46.9643	50.4491	62.8367	46.0349	0	0	0	1	0	0	1	0	0	1	3	2	1	1	2	1	2	0	0	1	0	2	2	3	0	1	1	0	1	0
832	1	14	0	0	1	43.3929	32.485	58.7551	35.1416	0	1	0	0	0	1	0	0	1	1	1	0	0	2	2	1	2	1	1	1	2	1	2	2	2	1	1	1	1	1
833	1	14	0	0	1	61.25	38.4731	52.6327	35.1416	1	0	0	1	0	1	1	1	1	1	2	3	1	2	2	0	0	1	2	2	2	1	1	0	4	0	1	0	0	0
836	1	15	0	0	1	34.2308	43.8863	35.4743	63.1963	0	0	0	0	0	1	1	1	1	1	3	2	1	2	2	2	0	0	0	1	1	2	2	0	2	0	1	2	2	2
837	1	15	0	0	0	44.7203	32.0379	47.332	47.2146	0	1	1	1	0	0	1	0	0	1	2	2	2	3	1	1	0	1	3	1	1	2	1	1	1	1	0	0	2	0
838	0	7	0	1	1	54.0377	26.4898	46.4658	42.8295	0	0	0	1	0	1	1	1	0	1	1	2	0	2	1	0	2	3	1	2	3	1	0	1	2	1	0	0	2	3
839	0	8	0	0	0	79.8995	30.7471	62.3786	23.6827	1	0	1	0	0	1	1	0	1	1	2	1	1	3	2	0	0	1	0	0	0	2	1	1	4	4	0	0	4	0
840	0	8	0	0	0	89.9497	36.4943	62.3786	35.0142	1	0	0	1	0	1	1	1	1	1	3	2	1	0	1	2	1	0	1	2	0	2	0	2	2	0	0	0	4	0
844	0	9	0	0	1	44.5833	59.7771	46.0667	59.6333	0	0	0	1	0	1	1	1	1	1	1	2	2	1	1	1	1	1	2	2	1	2	1	2	1	1	1	0	1	1
845	0	10	0	0	0	79.0455	42.9392	62.8097	38.7348	0	0	1	1	0	1	0	0	0	1	2	0	3	3	2	1	1	1	3	1	1	2	0	0	1	1	1	0	1	1
846	0	10	0	0	1	42.6818	46.3176	60.5973	31.4355	1	0	0	1	0	1	1	0	1	1	2	1	1	3	2	2	1	0	1	1	1	3	2	1	2	1	0	0	3	0
847	0	11	0	0	0	47.3264	46.7407	47.2895	51.4851	1	1	1	1	0	0	1	1	1	1	1	2	2	2	2	0	3	0	3	0	2	2	2	0	0	0	2	0	1	0
848	0	11	0	0	0	54.2708	36.8642	51.3963	53.4653	0	0	0	0	0	0	1	0	1	1	1	2	3	1	2	0	2	1	4	2	2	1	0	0	1	1	0	0	3	0
850	0	11	0	0	0	47.3264	39.3333	51.3963	49.505	0	0	0	0	0	0	1	0	1	1	2	1	0	3	2	1	0	0	4	0	1	2	3	0	1	2	1	0	3	0
851	0	11	0	0	0	57.7431	44.2716	63.7166	49.505	0	0	0	0	0	0	1	0	1	1	3	2	2	1	2	0	0	1	2	2	1	1	2	0	1	4	0	0	1	0
852	0	11	0	0	0	47.3264	49.2099	49.3429	43.5644	0	0	0	0	0	0	1	1	1	1	1	3	2	1	2	0	0	0	4	2	0	2	0	2	1	3	0	0	0	0
853	0	11	0	0	0	47.3264	51.679	39.076	33.6634	1	1	0	1	0	1	1	1	1	1	3	1	1	1	0	0	1	2	4	1	0	0	1	0	1	1	4	0	3	0
854	0	11	0	0	0	78.5764	54.1481	61.6632	37.6238	1	1	0	1	0	0	1	1	1	1	3	2	2	1	2	1	0	1	1	2	3	4	0	0	0	0	1	1	1	2
855	0	12	0	0	0	43.6744	37.4342	60.2169	63.4651	0	1	0	1	0	0	1	1	0	0	2	2	1	1	2	1	1	1	3	2	1	1	2	0	1	0	1	0	3	0
856	0	12	0	0	0	104.14	63.75	77.5705	42.5349	0	0	0	1	0	0	0	0	1	1	2	1	1	1	2	1	0	2	1	1	1	2	1	1	4	1	1	1	1	1
857	0	12	0	0	0	48.3256	53.8816	32.0174	56.4884	1	1	0	1	0	0	1	1	1	1	3	1	3	0	2	1	0	0	1	1	2	2	0	0	3	0	2	0	3	0
858	0	12	0	0	0	52.9767	40.7237	45.0325	47.186	1	0	0	1	0	0	1	0	0	0	2	2	3	1	2	0	0	1	1	1	2	1	0	1	2	0	1	1	4	1
859	0	12	0	0	0	52.9767	37.4342	27.679	58.814	0	0	0	0	1	0	1	1	0	1	1	2	2	1	2	0	2	1	1	3	0	2	0	1	2	2	0	0	2	0
860	0	13	0	0	0	45.2817	42.6329	42.9854	59.0041	1	0	0	1	0	1	1	0	1	0	2	1	2	2	2	2	0	0	3	1	2	1	1	0	1	2	1	0	3	0
861	0	13	0	0	0	48.8028	22.3797	51.3361	36.6463	0	0	0	1	0	0	0	1	0	1	1	1	1	3	2	0	4	0	4	1	1	1	2	0	2	1	0	0	0	0
862	0	13	0	0	0	55.8451	45.1646	55.5115	50.874	1	1	0	1	1	1	1	1	0	1	2	1	1	2	2	0	1	0	4	2	3	3	0	0	1	0	3	0	1	0
863	0	13	0	0	0	55.8451	45.1646	59.6868	42.7439	1	0	0	1	0	0	1	1	1	1	1	0	3	2	2	0	1	1	1	3	0	1	0	1	2	0	0	1	3	4
864	0	13	0	0	0	45.2817	45.1646	42.9854	54.939	1	0	0	1	0	0	1	0	0	1	2	2	2	1	2	0	1	0	2	2	2	3	2	0	1	1	1	0	2	0
865	0	13	0	0	0	45.2817	50.2278	61.7745	61.0366	1	0	0	0	0	0	1	1	1	1	2	2	3	1	2	1	2	1	1	0	1	0	1	1	0	1	0	4	1	0
866	0	13	0	1	1	41.7606	50.2278	53.4238	48.8415	1	1	0	1	0	0	1	1	1	1	2	3	1	1	2	1	0	1	2	1	1	2	1	1	2	0	0	0	3	1
867	0	13	0	0	0	45.2817	47.6962	61.7745	63.0691	1	0	0	1	0	1	1	1	1	1	3	3	2	1	2	1	0	0	0	1	1	2	1	0	1	0	3	1	3	1
868	0	14	0	0	0	49.9156	40.2765	62.6939	49.2892	1	0	0	0	0	1	1	1	1	1	2	2	1	3	0	0	2	1	1	1	1	2	1	2	1	1	1	2	1	1
869	0	14	0	0	1	45.6962	56.4055	60.6531	39.4853	1	1	1	1	0	0	1	1	1	1	2	1	2	2	2	1	0	0	1	1	1	1	1	2	3	2	0	0	4	0
871	0	14	0	0	0	58.3544	40.2765	48.4082	51.7402	1	1	0	1	0	0	1	0	0	0	2	3	1	2	2	0	2	0	1	0	2	1	2	1	1	1	2	0	1	0
872	0	14	0	0	1	41.4768	54.1014	60.6531	41.9363	1	1	1	0	0	1	1	1	1	1	2	2	1	2	2	1	0	1	2	2	2	1	1	3	1	1	1	0	1	0
873	0	14	0	0	0	41.4768	40.2765	48.4082	51.7402	1	0	0	1	0	0	0	0	1	1	3	2	2	1	1	2	0	1	2	3	1	1	2	0	1	2	0	0	1	0
874	0	15	0	0	0	50.3913	20.4938	56.2063	59.4673	0	1	0	0	0	0	1	0	0	1	2	2	1	3	2	0	0	1	2	1	1	3	2	1	2	0	0	0	0	1
876	0	15	0	0	1	46.0435	63.7037	52.7098	47.3608	1	1	0	1	0	0	1	1	1	1	2	3	1	1	1	1	0	3	1	1	3	2	1	0	1	0	0	1	1	3
878	0	15	0	0	0	41.6957	48.2716	33.479	66.7312	1	0	0	1	0	0	0	0	0	0	3	1	1	1	1	0	0	0	4	1	3	2	1	1	2	0	0	0	4	0
879	0	15	0	0	0	50.3913	39.0123	43.9685	40.0969	1	0	0	1	0	0	1	0	1	1	2	1	1	0	1	0	0	4	2	3	3	3	0	0	2	0	0	0	4	0
880	0	15	0	0	0	46.0435	29.7531	57.9545	49.7821	1	1	0	1	0	0	1	0	1	1	4	2	1	3	3	1	0	0	0	3	0	4	0	0	1	0	1	0	2	0
881	0	15	0	0	0	63.4348	35.9259	54.458	27.9903	1	0	0	1	0	0	1	0	0	0	1	1	0	3	0	0	2	1	0	1	3	1	4	4	3	0	0	0	0	0
882	1	7	0	0	0	76.2759	47.2927	52.6196	38.3065	1	0	0	0	0	1	1	1	0	1	2	0	2	1	0	0	0	1	2	3	4	3	2	1	0	1	2	0	1	2
883	1	7	0	0	1	48.6897	37.5366	54.8975	38.3065	1	0	0	0	1	1	1	1	0	0	1	1	0	1	2	2	1	1	0	0	1	1	1	0	0	3	2	2	4	3
884	1	8	0	0	1	56.8227	45.7995	54.8092	48.105	1	0	0	1	1	0	1	1	0	1	0	1	0	4	2	0	0	1	0	1	0	1	4	1	3	0	4	0	2	1
885	1	9	0	0	1	49.5692	42.3964	40.4565	53.8372	0	0	0	0	0	0	1	1	1	1	1	1	1	2	2	2	0	0	1	1	1	1	0	3	1	2	3	0	4	0
886	1	9	0	1	1	52.6462	27.6036	57.8478	53.8372	0	0	0	1	0	1	1	0	0	0	2	3	1	1	1	2	0	1	1	1	1	3	1	1	0	1	1	3	0	2
887	1	9	0	0	0	40.3385	48.3136	46.9783	49.9612	0	0	0	1	0	1	1	1	1	1	2	1	1	2	1	1	1	0	2	2	0	0	2	2	1	2	3	0	1	0
889	1	10	0	0	1	68.5512	50.1944	56.3991	56.7377	1	0	0	0	0	0	0	1	0	1	1	1	2	1	2	2	2	0	0	1	1	2	2	2	2	0	2	0	2	0
890	1	11	0	0	0	37.0486	35.2508	53.1333	63.8539	1	0	0	0	0	1	0	0	1	1	4	2	1	2	2	0	0	0	2	0	1	1	2	0	2	0	1	2	3	2
891	1	11	0	0	0	37.0486	55.3177	53.1333	63.8539	0	1	0	0	1	0	1	0	0	1	3	1	1	1	2	1	1	1	3	1	1	2	1	2	2	0	0	0	2	0
892	1	11	0	0	0	37.0486	41.9398	46.4667	71.4106	0	1	0	0	0	0	1	0	0	1	3	0	0	1	2	0	0	3	1	2	0	0	3	0	0	4	4	0	0	0
893	1	11	0	0	1	43.9931	38.5953	46.4667	43.7028	1	1	0	1	0	1	1	1	1	1	3	2	1	2	2	0	0	2	2	1	0	0	0	1	1	1	4	0	3	0
896	1	12	0	0	0	47.1429	48.2569	46.6034	62.7062	1	0	0	0	0	0	1	0	0	1	1	2	2	1	1	1	0	1	1	3	2	1	1	2	1	1	1	0	3	1
897	1	12	0	0	0	43.7415	29.9083	31.8354	57.5515	0	0	0	0	0	0	1	1	0	1	0	1	0	0	2	2	0	0	4	0	4	0	0	4	0	4	2	0	0	0
898	1	12	0	0	0	43.7415	29.9083	42.384	60.1289	0	0	1	1	1	1	1	1	1	1	1	1	0	0	2	0	0	0	0	3	0	1	3	0	3	0	2	0	4	3
899	1	13	0	0	0	47.9701	23.9103	57.6436	37.3288	0	0	0	0	0	0	1	1	1	1	2	2	3	0	2	1	0	0	1	2	0	0	4	0	0	1	1	0	4	0
900	1	13	0	0	1	65.8806	62.3718	67.5446	55.5936	1	0	0	1	0	0	1	1	0	1	2	3	1	1	2	0	0	2	1	1	1	0	0	4	4	0	0	0	3	0
901	1	13	0	0	1	59.9104	27.1154	55.6634	51.0274	1	1	0	1	0	0	1	1	1	1	2	1	2	1	0	1	0	0	0	1	2	0	1	0	1	0	0	1	2	1
902	1	13	0	0	1	47.9701	30.3205	49.7228	41.895	0	0	1	1	0	1	1	1	0	1	2	1	3	1	2	2	0	0	0	3	1	0	2	1	1	0	3	0	3	0
903	1	13	0	0	1	44.9851	59.1667	45.7624	53.3105	1	0	0	1	0	1	1	1	1	1	4	1	3	2	2	2	0	1	2	2	1	1	1	0	1	0	1	0	0	0
904	1	13	0	0	0	42	14.2949	55.6634	44.1781	0	1	1	1	0	0	1	0	1	1	2	2	2	2	0	2	0	1	0	1	1	2	1	1	4	0	1	1	3	0
905	1	13	0	0	1	50.9552	46.3462	45.7624	55.5936	1	0	0	1	0	1	1	0	0	0	0	2	0	2	2	2	1	1	2	2	1	1	1	1	2	1	2	1	2	1
907	1	14	0	0	0	50.5357	47.4551	54.6735	59.1068	1	0	0	1	0	1	1	1	1	1	0	1	2	2	2	0	2	0	0	1	1	3	4	1	1	1	3	0	0	0
908	1	14	0	0	0	36.25	59.4311	30.1837	46.0349	1	0	0	1	0	0	0	0	0	0	2	2	1	1	2	0	1	0	2	1	4	2	0	2	2	2	0	0	1	0
910	1	14	0	0	1	50.5357	41.4671	60.7959	52.5708	1	0	0	1	0	0	1	0	0	1	2	1	1	2	1	1	2	1	1	2	1	1	3	2	1	0	1	0	3	0
911	1	14	0	0	0	64.8214	53.4431	66.9184	48.2135	0	0	0	1	0	0	0	0	0	1	4	2	2	2	0	0	1	1	1	0	1	1	0	2	3	1	1	0	2	1
912	1	14	0	0	0	39.8214	44.4611	52.6327	39.4989	1	0	1	1	0	1	1	0	0	0	2	3	3	1	2	1	0	1	3	1	1	0	0	0	2	0	1	0	3	1
913	1	14	0	0	0	46.9643	47.4551	46.5102	54.7495	0	1	0	1	0	0	1	0	1	1	2	2	2	1	2	1	2	1	1	2	2	1	1	1	1	1	1	1	1	0
914	1	15	0	0	1	69.1958	53.3649	65.1186	56.347	1	0	0	1	0	1	1	1	1	1	3	2	2	2	2	0	1	0	1	2	2	0	3	1	1	2	1	0	2	0
915	1	15	0	0	0	44.7203	43.8863	47.332	54.0639	1	0	0	1	0	0	1	1	1	0	2	2	2	2	0	2	2	0	1	2	1	2	3	0	2	0	0	1	2	0
917	1	15	0	0	0	41.2238	55.7346	57.2134	38.0822	1	0	0	1	0	0	0	0	1	1	1	2	1	1	0	1	3	0	3	1	1	1	1	2	2	1	1	2	1	0
918	1	15	0	0	0	44.7203	50.9953	57.2134	44.9315	1	0	0	0	0	0	1	0	0	1	4	3	1	1	0	1	0	0	3	1	2	1	1	1	1	1	2	0	2	0
919	1	15	0	0	0	65.6993	55.7346	65.1186	44.9315	0	0	0	1	0	1	1	1	1	1	3	1	0	1	2	1	2	0	1	2	2	2	1	3	3	1	0	0	0	0
920	0	7	0	0	0	46.4906	55.0612	46.4658	11.8217	1	1	0	0	0	1	1	0	0	1	3	2	1	2	0	0	1	2	4	1	0	1	1	0	1	1	3	0	3	0
921	0	7	0	0	0	76.6792	50.9796	57.4247	38.9535	0	0	0	0	0	0	1	0	0	1	2	2	2	1	2	1	2	0	0	0	1	1	1	2	0	2	1	2	3	0
923	0	7	0	0	0	46.4906	55.0612	43.726	4.06977	1	0	0	0	0	1	1	1	0	1	3	2	1	2	0	0	1	2	4	1	0	0	1	0	1	1	4	0	3	0
924	0	7	0	0	0	54.0377	50.9796	57.4247	50.5814	1	1	1	1	1	1	1	1	1	1	2	3	3	2	2	2	1	1	0	0	0	3	1	0	1	0	2	0	3	0
925	0	8	0	0	1	49.7487	50.8621	52.6699	46.3456	1	1	0	0	0	0	1	0	1	1	0	1	0	2	2	1	3	1	0	2	0	1	0	4	0	1	2	1	1	4
926	0	8	0	0	0	44.7236	56.6092	42.9612	49.1785	1	0	0	0	0	0	1	1	0	1	1	2	1	1	2	1	1	2	1	0	3	4	1	1	2	1	0	0	1	0
927	0	9	0	0	0	55	31.1146	50.5111	42.9667	1	0	0	1	0	1	1	0	0	1	1	0	1	1	2	1	1	1	1	1	1	1	2	2	2	2	2	2	2	2
928	0	9	0	0	0	49.7917	47.0382	46.0667	12.9667	1	1	0	1	0	0	1	1	1	1	2	2	1	2	0	0	1	2	4	1	0	1	1	0	1	1	4	0	3	0
929	0	9	0	0	1	70.625	24.7452	74.9556	26.3	0	1	0	1	0	0	1	0	1	1	1	0	0	2	2	4	0	2	0	1	2	0	2	0	2	4	1	0	3	1
930	0	10	0	0	1	69.9545	26.0473	53.9602	46.0341	1	1	1	1	1	1	1	1	1	1	2	1	2	1	2	2	0	2	1	1	1	2	2	2	1	2	1	0	1	0
931	0	10	0	0	0	56.3182	49.6959	42.8982	24.1363	1	1	0	1	0	1	1	1	1	1	3	2	1	2	0	0	1	2	4	1	0	0	1	0	1	1	4	0	3	0
932	0	10	0	0	1	47.2273	49.6959	45.1106	29.0024	1	1	0	1	0	1	1	1	1	1	3	2	1	2	0	0	1	2	4	1	0	1	1	0	1	1	3	0	3	0
933	0	10	0	0	1	56.3182	36.1824	42.8982	26.5693	1	0	0	1	0	1	1	1	1	1	3	2	1	2	0	0	1	2	4	1	1	0	1	0	1	1	4	0	3	0
934	0	10	0	0	0	42.6818	46.3176	45.1106	24.1363	1	1	0	1	0	1	1	1	1	1	3	2	1	2	0	0	1	2	4	1	0	0	1	0	1	1	4	0	3	0
935	0	10	0	0	1	69.9545	42.9392	42.8982	38.7348	1	0	0	0	0	0	1	0	0	1	1	2	0	1	2	3	3	3	0	1	1	2	2	1	0	0	0	0	4	0
936	0	11	0	0	0	54.2708	54.1481	45.2361	47.5248	1	1	1	1	0	0	1	1	1	0	3	1	2	1	2	1	0	1	2	1	1	1	1	2	2	1	1	0	3	0
938	0	11	0	0	0	50.7986	46.7407	63.7166	49.505	0	0	0	0	0	1	1	1	1	0	2	1	0	2	2	0	1	2	3	2	2	3	0	1	3	0	0	1	3	1
939	0	11	0	0	0	47.3264	49.2099	41.1294	33.6634	1	1	0	1	0	1	1	1	1	1	3	2	1	2	0	0	1	2	4	1	0	0	1	0	1	1	4	0	3	0
940	0	11	0	0	1	50.7986	51.679	41.1294	31.6832	1	1	0	1	0	1	1	1	1	1	3	2	1	2	0	0	1	2	4	1	0	0	1	0	1	1	4	0	3	0
941	0	12	0	0	0	48.3256	40.7237	55.8785	30.907	0	0	1	1	0	0	1	1	1	1	2	1	3	0	2	0	0	0	1	2	3	2	1	3	2	0	0	2	2	0
942	0	12	0	0	0	39.0233	50.5921	42.8633	63.4651	1	0	0	1	0	1	1	0	1	1	1	2	2	1	1	2	0	0	2	1	2	2	1	3	1	0	1	1	3	1
943	0	12	0	0	1	43.6744	30.8553	62.3861	49.5116	0	0	0	1	0	0	1	1	1	1	2	1	3	1	2	0	0	0	3	3	1	2	2	4	0	0	1	0	1	0
944	0	12	0	0	0	43.6744	37.4342	32.0174	61.1395	0	0	0	0	0	0	0	0	0	1	2	1	2	2	1	0	1	2	0	1	2	2	1	2	1	2	0	0	0	3
945	0	12	0	0	0	52.9767	30.8553	42.8633	61.1395	1	0	0	1	0	1	1	0	1	1	2	1	3	2	2	0	1	2	0	0	2	3	1	2	2	0	0	0	3	0
946	0	12	0	0	1	66.9302	50.5921	66.7245	56.4884	1	1	1	1	0	0	1	1	1	1	0	2	2	1	2	2	2	0	1	1	1	2	1	2	1	2	1	1	2	1
947	0	12	0	0	0	62.2791	17.6974	60.2169	35.5581	1	0	0	1	0	1	1	1	1	1	2	2	2	1	1	1	0	2	3	1	1	1	0	1	3	1	1	0	2	1
948	0	13	0	1	1	45.2817	60.3544	49.2484	48.8415	1	0	0	1	0	1	0	0	0	1	4	1	2	1	2	3	1	2	0	3	2	1	1	0	2	0	1	0	1	0
950	0	13	0	0	0	55.8451	29.9747	45.0731	52.9065	0	1	0	0	0	0	0	0	0	1	2	3	0	0	2	0	3	2	0	1	1	2	1	2	1	1	1	0	3	0
951	0	13	0	0	1	45.2817	42.6329	51.3361	52.9065	1	0	0	1	0	1	1	1	1	1	2	2	1	1	2	1	0	0	1	1	2	2	1	2	1	2	1	1	2	0
952	0	13	0	1	1	41.7606	52.7595	42.9854	52.9065	1	0	0	0	0	1	1	1	1	1	4	1	2	4	0	4	0	0	4	0	0	1	0	0	0	0	4	0	4	0
954	0	14	0	0	0	58.3544	58.7097	50.449	39.4853	1	0	0	1	0	1	0	0	0	1	2	1	0	3	2	0	1	1	3	1	3	1	3	0	2	1	0	0	1	1
955	0	14	0	0	0	41.4768	47.1889	50.449	56.6422	1	0	0	1	0	0	1	1	0	1	2	1	3	0	0	1	0	0	0	0	2	4	2	3	2	0	1	0	3	0
956	0	14	0	0	0	49.9156	44.8848	50.449	46.8382	0	0	0	0	0	0	0	1	0	1	1	2	2	1	2	2	0	1	2	2	1	1	1	2	2	1	2	0	0	0
957	0	14	0	0	0	54.135	56.4055	62.6939	61.5441	0	0	0	1	0	1	1	0	0	1	3	2	2	2	2	1	1	0	1	1	1	2	1	2	1	1	1	1	2	1
958	0	14	0	0	1	41.4768	61.0138	44.3265	41.9363	1	0	0	1	0	0	1	0	0	1	3	2	4	2	2	2	1	1	0	0	1	3	0	0	1	0	0	0	0	2
959	0	14	0	0	0	66.7932	47.1889	48.4082	46.8382	1	0	0	0	0	0	1	1	1	1	3	2	2	2	2	1	0	0	2	0	1	2	1	1	2	1	1	0	3	0
960	0	14	0	0	1	79.4515	44.8848	58.6122	46.8382	1	0	1	1	0	0	1	1	1	1	2	1	3	1	2	0	0	2	0	1	1	3	1	1	1	0	0	3	3	4
962	0	14	0	0	0	49.9156	61.0138	54.5306	66.4461	1	1	1	0	0	0	1	1	1	1	4	4	2	2	2	2	1	0	1	0	0	1	1	1	1	1	0	1	2	1
963	0	14	0	0	0	49.9156	33.3641	56.5714	46.8382	1	0	0	1	0	0	1	1	1	1	2	2	1	3	3	3	0	1	1	1	1	3	1	0	2	1	0	0	1	0
964	0	15	0	0	1	50.3913	54.4444	56.2063	44.9395	0	0	0	1	0	0	0	1	1	1	1	2	2	2	2	1	1	0	2	1	1	1	2	1	3	0	1	1	3	1
965	0	15	0	0	0	46.0435	54.4444	56.2063	59.4673	1	0	0	0	0	0	0	0	0	1	3	2	2	1	2	1	1	0	0	2	1	1	3	2	0	0	2	0	3	0
966	0	15	0	0	0	63.4348	29.7531	50.9615	35.2542	0	0	0	0	0	0	1	0	0	1	2	1	1	2	2	1	1	1	0	0	2	2	2	0	2	2	2	0	0	1
967	1	7	0	0	1	69.3793	57.0488	48.0638	46.371	0	0	0	0	0	0	1	0	0	1	2	2	1	2	2	1	2	0	0	1	1	1	2	0	2	1	2	2	3	0
968	1	7	0	0	1	45.2414	49.7317	57.1754	51.7473	1	0	0	1	1	1	1	1	1	1	1	2	2	1	2	2	1	0	0	1	2	1	2	2	1	1	1	0	0	3
969	1	7	0	0	0	69.3793	37.5366	64.0091	46.371	1	1	0	1	0	0	1	0	1	1	1	2	1	1	2	1	1	1	1	2	2	1	3	2	1	1	2	0	1	1
972	1	7	0	0	0	48.6897	54.6098	36.6743	35.6183	1	1	0	0	0	1	1	0	0	1	3	2	1	2	0	0	1	2	4	1	0	0	1	0	1	1	4	0	3	0
973	1	8	0	1	1	56.8227	24.3198	70.0763	42.2741	0	1	0	0	0	0	0	0	1	1	2	1	0	1	2	2	3	1	2	2	4	0	1	1	0	1	0	1	2	2
974	1	8	0	0	1	40.1003	50.5728	44.631	59.7668	0	0	0	1	0	1	1	1	1	1	3	2	1	2	2	1	2	0	1	2	0	0	0	2	2	0	2	0	4	0
976	1	9	0	0	0	55.7231	48.3136	51.3261	51.8992	1	1	1	1	0	1	1	1	1	1	1	1	1	1	2	1	4	0	1	1	1	1	1	1	1	1	4	0	1	2
977	1	10	0	0	0	47.3498	44.6389	41.2148	31.1514	1	1	0	1	0	1	1	1	1	1	3	2	1	2	0	0	1	2	4	1	0	0	1	0	1	1	4	0	3	0
978	1	10	0	0	1	47.3498	47.4167	45.5531	33.2836	1	1	0	0	0	1	1	1	1	1	3	2	1	2	0	0	1	2	4	1	0	0	1	0	1	1	4	0	3	0
981	1	10	0	0	0	43.8163	52.9722	41.2148	31.1514	1	1	0	1	0	1	1	1	1	1	3	2	1	2	0	0	1	2	4	1	0	0	1	0	1	1	4	0	3	0
982	1	10	0	0	0	47.3498	47.4167	45.5531	37.548	1	1	0	0	0	1	1	1	1	1	3	2	1	2	0	0	1	2	4	1	0	0	1	0	1	1	4	0	3	0
983	1	10	0	1	1	61.4841	33.5278	69.4143	41.8124	0	0	0	0	1	0	1	1	1	0	3	2	2	4	2	0	0	0	0	0	3	2	0	0	1	1	0	4	4	0
984	1	10	0	0	0	43.8163	50.1944	47.7223	54.6055	0	0	0	0	0	0	1	0	0	1	3	1	1	0	2	0	0	0	1	1	2	1	2	3	4	4	0	0	0	0
985	1	10	0	0	1	43.8163	50.1944	41.2148	35.4158	1	1	0	1	0	1	1	1	1	1	3	2	1	2	0	0	1	2	4	1	0	0	1	0	1	1	4	0	3	0
986	1	10	0	0	0	47.3498	44.6389	45.5531	29.0192	1	1	0	1	0	1	0	1	1	1	3	2	1	2	0	0	1	2	4	1	0	0	1	0	1	1	4	0	3	0
987	1	11	0	0	1	50.9375	25.2174	55.3556	53.7783	0	1	0	0	1	0	1	0	1	1	1	2	0	1	2	0	1	2	3	4	1	2	1	2	0	1	0	0	0	2
988	1	11	0	0	0	43.9931	41.9398	62.0222	66.3728	0	1	1	0	0	0	1	0	0	1	3	1	2	1	2	0	0	2	1	1	3	2	2	3	1	0	0	0	0	1
989	1	11	0	0	0	43.9931	28.5619	39.8	36.1461	1	1	0	1	0	1	1	1	1	1	3	2	1	2	0	0	1	2	4	1	0	0	1	0	1	1	4	0	3	0
991	1	11	0	0	0	50.9375	41.9398	59.8	58.8161	1	0	0	0	0	0	1	0	1	1	2	1	2	1	2	0	1	1	4	1	1	2	3	1	1	1	0	0	2	0
992	1	11	0	0	1	40.5208	41.9398	48.6889	58.8161	1	1	0	1	1	0	1	1	1	0	2	2	1	1	1	2	3	1	1	2	2	1	1	2	1	0	0	3	0	1
993	1	11	0	1	0	40.5208	41.9398	44.2444	41.1839	1	1	0	1	1	1	1	1	1	1	3	2	1	2	0	0	1	2	4	1	0	0	1	0	1	1	4	0	3	0
994	1	12	0	0	0	47.1429	45.1988	40.2743	49.8196	0	0	0	1	0	0	1	1	1	1	3	1	2	2	4	0	0	0	2	2	0	2	4	1	0	1	0	0	2	0
995	1	12	0	0	0	53.9456	45.1988	59.2616	60.1289	1	0	0	1	0	0	1	0	0	1	3	1	2	2	1	0	1	0	1	0	4	2	0	3	0	0	2	0	4	0
996	1	12	0	0	0	74.3537	20.7339	52.9325	52.3969	1	0	0	1	0	0	1	1	1	1	2	1	2	1	2	1	2	3	1	3	1	2	2	1	1	0	0	0	0	0
997	1	12	0	0	1	33.5374	23.792	46.6034	36.933	0	0	0	0	0	0	0	0	1	1	3	0	2	1	2	0	1	0	0	0	0	1	4	3	4	0	0	1	3	0
998	1	12	0	0	0	50.5442	32.9664	44.4937	42.0876	1	0	0	1	0	0	1	0	1	1	2	1	1	2	2	0	1	3	2	0	0	1	0	2	1	1	1	3	3	1
999	1	12	0	1	0	36.9388	36.0245	40.2743	54.9742	0	1	0	1	0	1	1	1	1	1	1	2	1	1	2	0	0	1	2	1	2	2	1	1	1	2	1	2	3	0
1000	1	12	0	0	0	43.7415	39.0826	46.6034	36.933	0	1	0	1	0	1	1	0	1	1	2	1	2	1	2	0	2	2	0	1	3	1	1	1	1	1	2	0	2	1
1001	1	12	0	0	1	40.3401	29.9083	55.0422	34.3557	1	1	0	1	0	1	1	0	0	1	3	1	2	2	2	1	0	1	1	2	1	2	2	1	1	1	1	0	1	1
1002	1	13	0	0	0	42	11.0897	37.8416	51.0274	0	0	0	0	1	1	1	1	1	0	4	1	4	1	2	0	2	2	2	2	1	2	0	0	1	1	0	0	0	0
1003	1	13	0	1	0	59.9104	20.7051	65.5644	55.5936	0	1	0	0	0	0	1	1	1	1	1	2	1	2	2	2	1	1	1	2	3	2	0	1	0	0	1	1	3	3
1004	1	13	0	0	0	47.9701	33.5256	59.6238	37.3288	1	1	0	0	0	1	1	0	1	1	2	1	1	2	2	0	0	1	1	0	4	1	3	1	1	0	1	1	0	3
1005	1	13	0	0	0	62.8955	36.7308	63.5842	48.7443	0	0	0	0	0	1	1	1	0	1	2	2	2	2	2	2	0	0	1	0	1	2	2	1	2	1	2	0	0	0
1006	1	13	0	0	0	42	49.5513	47.7426	46.4612	1	0	0	1	0	0	1	0	0	0	2	1	2	2	2	1	2	1	1	1	1	1	1	1	2	1	2	1	1	1
1008	1	13	0	0	0	56.9254	20.7051	61.604	39.6119	0	1	0	0	0	0	1	0	1	1	1	2	2	3	2	0	0	1	0	1	1	2	0	0	3	4	1	2	3	2
1009	1	13	0	0	1	44.9851	36.7308	55.6634	55.5936	1	1	1	1	0	0	1	0	1	1	3	2	2	1	2	2	0	0	2	1	1	1	3	0	2	0	0	0	4	0
1010	1	13	0	0	0	42	23.9103	49.7228	62.4429	1	0	0	1	0	1	1	1	1	0	3	1	2	1	2	0	1	0	1	3	0	2	2	0	2	0	2	0	0	2
1011	1	14	0	0	1	43.3929	32.485	54.6735	50.3922	1	0	0	0	0	1	1	1	1	1	4	2	2	2	0	0	2	0	0	2	2	4	2	0	2	0	0	0	2	2
1012	1	14	0	0	1	50.5357	32.485	50.5918	39.4989	1	0	0	0	0	1	1	1	1	1	1	3	3	2	2	1	1	1	2	3	2	0	0	0	0	1	1	2	1	3
1013	1	14	0	0	0	39.8214	50.4491	46.5102	43.8562	1	0	0	1	0	0	1	0	1	1	4	3	3	2	2	2	0	1	1	1	1	3	0	0	1	1	0	0	0	0
1014	1	14	0	0	0	46.9643	38.4731	62.8367	52.5708	0	0	0	1	0	0	0	0	0	1	4	2	0	0	2	1	1	3	1	1	1	1	0	0	3	0	0	0	3	2
1015	1	14	0	0	1	43.3929	41.4671	54.6735	54.7495	1	0	0	0	0	0	1	1	1	1	4	2	1	1	2	1	0	1	2	2	2	1	2	1	1	1	1	0	1	1
1016	1	14	0	0	0	39.8214	56.4371	40.3878	54.7495	1	0	0	1	0	0	1	0	0	1	4	3	3	2	2	1	0	0	1	1	1	1	0	1	2	2	0	0	2	1
1017	1	15	0	0	0	44.7203	41.5166	61.166	42.6484	1	0	0	0	0	0	1	0	1	1	3	1	0	2	2	0	0	1	2	1	2	3	1	2	2	0	2	0	2	1
1019	0	7	0	0	0	46.4906	46.898	43.726	15.6977	1	0	0	0	0	1	1	1	0	1	3	2	1	2	0	0	1	2	4	1	0	1	1	0	1	1	4	0	3	0
1020	0	7	0	0	0	42.717	50.9796	46.4658	54.4574	1	0	0	1	0	1	1	1	1	1	3	2	1	2	1	2	1	0	1	2	0	1	0	3	2	0	2	0	4	0
1021	0	7	0	0	0	57.8113	38.7347	46.4658	11.8217	1	0	0	0	0	1	1	1	0	1	3	2	1	2	0	0	1	2	4	1	0	1	1	0	1	1	4	0	3	0
1022	0	7	0	0	0	54.0377	50.9796	46.4658	4.06977	1	1	0	1	0	1	1	1	1	1	3	2	1	2	1	0	1	2	4	1	0	1	0	0	1	1	4	0	3	0
1026	0	8	0	0	0	59.799	45.1149	55.0971	40.6799	0	0	0	1	0	1	1	1	1	1	3	2	2	1	1	2	1	0	1	2	2	1	0	2	2	0	2	0	4	0
1027	0	9	0	0	0	44.5833	50.2229	46.0667	59.6333	0	0	0	1	0	1	1	1	1	1	3	2	1	2	2	2	1	0	1	2	2	1	2	2	2	0	2	0	2	0
1029	0	9	0	0	1	75.8333	40.6688	63.8444	26.3	0	0	0	0	0	0	0	0	0	1	1	1	2	1	2	0	0	2	2	1	2	1	3	1	3	1	0	3	0	1
1032	0	9	0	1	0	39.375	47.0382	41.6222	59.6333	1	1	0	0	0	0	0	0	1	1	2	1	3	2	2	1	2	0	3	0	1	1	2	0	2	1	2	0	2	0
1033	0	9	0	0	1	65.4167	53.4076	57.1778	42.9667	0	0	0	0	0	1	1	0	0	1	3	3	2	2	2	2	2	2	0	0	0	2	0	0	1	1	0	2	3	1
1034	0	9	0	0	1	70.625	62.9618	57.1778	46.3	0	0	0	0	0	0	1	0	1	1	2	1	2	3	2	1	2	1	1	2	3	0	1	2	1	1	1	1	1	1
1035	0	9	0	0	0	49.7917	53.4076	50.5111	46.3	1	0	0	1	0	0	1	1	0	1	2	3	1	1	1	1	2	0	1	0	1	3	1	2	3	1	0	0	3	0
1036	0	9	0	0	0	44.5833	21.5605	52.7333	22.9667	1	0	0	0	0	0	1	1	1	1	2	0	0	2	2	3	1	0	4	3	0	1	2	0	2	1	1	0	0	1
1037	0	10	0	0	1	47.2273	46.3176	45.1106	29.0024	1	1	0	1	0	1	1	1	1	1	3	2	1	2	0	0	1	2	4	1	0	1	1	0	1	1	4	0	3	0
1038	0	10	0	0	0	51.7727	46.3176	42.8982	24.1363	1	1	1	1	0	1	0	1	0	1	3	2	1	2	0	0	1	2	4	1	0	1	1	0	1	1	4	0	3	0
1039	0	10	0	0	1	42.6818	36.1824	42.8982	48.4672	0	0	0	0	0	0	1	0	0	1	3	1	1	1	0	0	0	1	2	1	3	3	3	3	1	1	1	0	1	1
1040	0	10	0	0	0	51.7727	49.6959	42.8982	24.1363	1	1	0	1	0	1	1	1	1	1	3	2	1	2	0	0	1	2	4	1	0	1	1	0	1	1	4	0	3	0
1041	0	10	0	0	0	47.2273	46.3176	42.8982	31.4355	1	1	0	1	0	1	1	1	1	1	3	2	1	2	0	0	1	2	4	1	0	1	1	0	1	1	4	0	3	0
1042	0	10	0	0	1	47.2273	46.3176	45.1106	24.1363	1	0	0	1	0	1	1	1	1	1	3	2	2	1	0	0	1	2	4	1	1	0	1	0	1	1	4	0	3	0
1043	0	10	0	0	1	47.2273	46.3176	45.1106	29.0024	1	1	1	0	0	1	1	1	1	1	3	2	1	2	0	0	1	2	4	1	0	1	1	0	1	1	4	0	3	0
1044	0	10	0	0	1	60.8636	46.3176	67.2345	46.0341	0	0	0	1	0	1	1	1	1	1	2	3	2	1	1	1	0	0	0	1	3	1	3	1	1	2	1	3	1	1
1045	0	10	0	0	0	51.7727	46.3176	42.8982	24.1363	1	1	0	1	0	1	1	0	0	1	3	2	1	0	0	0	1	2	4	1	0	1	1	0	1	1	4	0	3	0
1046	0	10	0	0	0	51.7727	42.9392	45.1106	26.5693	1	1	0	0	0	1	1	0	0	1	3	2	1	2	2	0	1	2	4	1	0	0	1	0	1	1	4	0	0	0
1047	0	11	0	0	0	40.3819	49.2099	49.3429	57.4257	0	0	0	0	0	0	0	0	0	0	1	2	1	3	0	2	0	2	4	1	0	2	1	0	1	2	3	0	3	0
1048	0	11	0	0	1	88.9931	61.5556	78.0903	41.5842	0	0	0	0	0	0	1	0	0	1	2	2	2	1	2	0	0	0	1	0	2	3	3	1	0	0	4	0	3	0
1049	0	11	0	0	1	43.8542	51.679	39.076	37.6238	1	1	0	0	0	1	1	1	1	1	3	2	1	2	1	0	1	2	2	2	0	1	1	0	1	1	4	0	3	0
1050	0	11	0	0	0	40.3819	46.7407	39.076	59.4059	0	1	0	0	1	0	1	0	1	1	2	0	1	2	2	1	2	2	1	3	1	2	3	1	2	1	0	0	2	0
1051	0	11	0	0	1	54.2708	49.2099	41.1294	31.6832	1	1	0	1	0	1	1	1	1	1	3	2	1	2	1	0	1	2	4	1	0	1	0	0	1	1	4	0	3	0
1052	0	11	0	0	0	54.2708	41.8025	45.2361	33.6634	1	1	0	0	0	1	1	1	1	1	3	2	1	2	0	0	1	2	4	1	0	1	1	0	1	1	4	0	3	0
1053	0	11	0	0	0	47.3264	51.679	39.076	33.6634	1	1	0	1	0	1	1	1	1	1	3	2	1	2	0	0	1	2	4	1	0	1	1	0	1	1	4	0	3	0
1054	0	11	0	0	0	54.2708	46.7407	45.2361	31.6832	1	1	0	1	0	1	1	1	1	1	3	2	1	2	0	0	1	2	4	1	0	1	1	0	1	1	4	0	3	0
1055	0	12	0	0	0	57.6279	37.4342	45.0325	47.186	1	1	1	1	1	1	1	1	1	0	2	1	1	2	2	1	1	2	0	1	2	1	2	1	2	1	2	2	1	0
1056	0	12	0	0	0	71.5814	53.8816	42.8633	44.8605	0	0	0	1	0	1	1	1	1	1	3	4	1	3	2	1	0	2	2	0	0	1	0	2	2	1	1	0	3	0
1057	0	12	0	0	1	104.14	63.75	77.5705	42.5349	1	0	1	1	0	0	0	0	0	1	2	1	1	1	1	1	4	1	2	1	1	1	1	4	1	1	1	1	1	1
1058	0	12	0	1	0	57.6279	53.8816	36.3557	44.8605	0	0	0	1	0	0	1	0	1	1	2	1	2	1	2	0	0	1	1	1	2	2	3	2	2	1	1	1	2	0
1059	0	12	0	0	1	57.6279	34.1447	51.5401	51.8372	1	0	0	1	0	0	1	0	0	0	2	1	1	2	2	2	0	1	2	2	1	1	1	3	2	2	1	0	2	0
1060	0	12	0	0	1	48.3256	47.3026	36.3557	30.907	1	1	0	1	0	1	1	1	1	1	3	2	1	2	0	0	1	2	4	1	0	1	1	0	1	1	4	0	3	0
1062	0	12	0	1	1	52.9767	57.1711	40.6941	47.186	0	0	0	1	0	1	0	0	1	1	3	1	1	2	2	2	2	2	2	2	2	0	3	1	1	1	0	0	1	0
1063	0	12	0	0	0	52.9767	47.3026	51.5401	63.4651	1	0	0	0	0	0	1	0	1	1	3	2	2	3	2	1	2	1	2	1	2	1	0	1	0	2	1	0	2	0
1064	0	13	0	0	0	38.2394	55.2911	49.2484	44.7764	1	0	0	1	0	1	1	1	1	1	3	3	3	2	2	2	1	1	0	1	1	2	0	1	0	0	2	1	3	1
1065	0	13	0	0	1	52.3239	62.8861	51.3361	48.8415	1	0	0	1	0	0	0	0	0	1	2	1	3	0	2	1	0	0	3	0	0	1	0	0	3	2	3	0	4	0
1067	0	13	0	0	0	41.7606	27.443	45.0731	48.8415	1	0	0	0	0	1	1	1	1	0	1	2	1	3	2	1	1	0	1	2	0	2	1	2	2	1	1	2	3	1
1069	0	13	0	0	0	45.2817	35.038	61.7745	52.9065	1	0	0	0	0	1	1	1	1	1	1	3	1	4	2	2	3	1	1	0	0	1	1	0	1	0	1	3	4	2
1070	0	13	0	0	1	41.7606	32.5063	36.7223	50.874	1	0	0	0	0	0	1	0	0	0	2	1	3	1	1	1	2	1	0	1	2	2	3	1	1	2	1	0	1	1
1071	0	14	0	0	1	37.2574	47.1889	54.5306	44.3873	1	1	0	1	0	1	1	1	1	1	2	1	1	2	2	0	1	2	1	2	2	1	0	2	3	1	1	1	2	3
1072	0	14	0	0	1	66.7932	24.1475	42.2857	44.3873	0	0	0	1	0	1	1	1	0	1	3	2	3	2	2	2	1	1	3	1	0	1	1	0	1	1	1	0	1	0
1073	0	14	0	0	1	49.9156	40.2765	60.6531	44.3873	1	1	0	1	0	1	1	0	1	1	2	2	1	3	2	0	1	1	2	2	2	3	1	3	0	1	1	0	0	0
1075	0	14	0	0	0	41.4768	35.6682	54.5306	59.0931	1	0	0	1	0	0	1	1	1	1	3	2	3	2	0	1	1	1	3	2	1	1	1	1	1	1	0	2	2	1
1076	0	14	0	0	0	37.2574	35.6682	48.4082	46.8382	1	0	0	1	0	0	1	0	0	1	3	1	1	2	2	2	1	1	1	2	1	2	1	1	1	1	1	0	3	1
1077	0	14	0	0	0	71.0127	47.1889	68.8163	32.1324	0	0	0	0	0	0	1	1	1	1	1	2	0	2	2	1	2	0	0	0	1	2	3	3	3	0	0	2	1	3
1078	0	14	0	0	0	58.3544	40.2765	56.5714	46.8382	0	0	0	1	0	0	1	1	0	0	1	2	3	2	2	1	0	0	3	0	0	0	2	1	4	0	0	0	0	4
1079	0	14	0	0	0	54.135	37.9724	42.2857	49.2892	0	1	0	1	0	0	1	0	0	0	2	1	1	2	2	1	2	1	1	2	2	0	1	2	1	2	2	1	2	2
1080	0	14	0	0	1	37.2574	47.1889	44.3265	63.9951	1	0	0	1	0	0	1	1	1	1	4	2	3	1	0	0	1	0	2	1	1	1	2	0	2	2	2	0	3	0
1081	0	15	0	0	1	50.3913	51.358	57.9545	37.6755	1	0	0	0	0	0	1	1	1	1	2	0	0	2	2	0	3	1	0	0	1	3	4	3	2	0	0	0	4	0
1082	0	15	0	0	0	72.1304	45.1852	57.9545	37.6755	1	0	0	1	0	0	0	1	0	0	3	0	0	2	2	0	1	1	0	1	3	3	4	0	3	0	0	0	0	3
1084	0	15	0	0	1	46.0435	57.5309	40.472	66.7312	1	0	0	1	0	1	1	0	0	1	2	2	1	1	2	2	1	1	1	2	2	2	1	2	1	2	1	0	2	0
1085	0	15	0	0	0	54.7391	54.4444	50.9615	52.2034	0	1	0	1	0	1	1	1	1	1	3	2	3	2	1	1	0	1	2	1	2	1	1	3	1	0	2	0	2	0
1086	1	7	0	0	1	48.6897	44.8537	48.0638	43.6828	1	0	0	0	1	1	1	1	1	1	2	0	0	2	2	1	0	1	1	3	2	1	4	2	1	0	2	2	3	1
1087	1	7	0	0	0	48.6897	52.1707	48.0638	24.8656	1	0	0	0	0	1	1	1	0	1	3	2	1	2	0	0	1	2	4	1	0	1	1	0	1	1	4	0	3	0
1089	1	7	0	0	0	65.931	49.7317	70.8428	35.6183	1	1	0	1	0	1	1	1	1	1	0	1	0	2	2	3	1	2	0	2	1	3	1	2	0	2	1	3	1	0
1090	1	8	0	0	0	43.4448	52.9594	47.1756	62.6822	0	0	0	1	0	1	1	1	1	1	3	2	2	2	1	2	1	0	1	2	0	1	0	2	2	0	2	0	4	0
1093	1	8	0	0	0	46.7893	45.7995	42.0865	48.105	0	0	0	1	0	1	1	1	1	1	3	2	1	2	2	2	1	0	1	2	0	1	0	2	2	0	2	0	4	0
1094	1	8	0	0	0	46.7893	33.8663	59.8982	59.7668	0	0	1	0	0	0	1	0	0	1	2	1	3	1	2	1	2	3	1	2	3	1	0	1	2	1	1	0	1	0
1095	1	9	0	0	0	46.4923	51.2722	44.8043	32.5194	1	1	0	0	0	1	1	1	1	1	3	2	1	2	0	0	1	2	4	1	0	1	1	0	1	1	4	0	3	0
1096	1	9	0	1	1	52.6462	60.1479	60.0217	59.6512	1	0	0	1	0	1	1	1	0	1	2	2	1	2	2	0	0	0	3	2	1	0	0	4	4	0	2	1	2	0
1097	1	10	0	0	0	50.8834	47.4167	39.0456	31.1514	1	1	0	1	0	1	1	1	1	1	3	2	1	2	2	1	1	0	4	1	0	0	1	0	1	1	4	0	3	0
1098	1	10	0	0	0	68.5512	41.8611	49.8915	54.6055	1	0	0	0	0	1	1	0	1	1	0	0	2	1	2	1	0	3	2	1	3	0	2	4	1	2	2	0	0	0
1099	1	10	0	0	0	43.8163	50.1944	39.0456	31.1514	1	1	0	1	0	1	1	1	1	1	3	2	1	2	0	0	1	2	4	1	0	1	1	0	1	1	4	0	3	0
1101	1	10	0	0	0	50.8834	44.6389	41.2148	31.1514	1	1	0	1	0	1	1	1	1	1	3	2	1	2	1	0	1	2	4	1	0	0	1	0	1	1	4	0	3	0
1102	1	10	0	0	0	43.8163	50.1944	56.3991	58.8699	1	1	1	1	0	1	1	0	1	1	1	3	2	2	2	2	1	1	0	2	1	2	1	0	1	2	3	0	2	0
1103	1	10	0	0	0	47.3498	41.8611	41.2148	26.887	1	1	0	1	0	1	1	1	1	1	3	2	1	2	0	0	1	2	4	1	0	1	1	0	1	1	4	0	3	0
1104	1	10	0	0	0	43.8163	50.1944	41.2148	33.2836	1	1	0	0	0	1	1	1	1	1	3	2	1	2	0	0	1	2	4	1	0	1	1	0	1	1	4	0	3	0
1105	1	10	0	0	0	50.8834	41.8611	43.3839	39.6802	1	0	1	0	0	1	0	1	1	1	3	2	1	2	0	0	1	2	4	2	0	0	1	0	1	1	4	0	3	0
1108	1	11	0	0	0	37.0486	41.9398	39.8	71.4106	1	0	1	0	0	0	1	0	1	1	3	2	1	1	2	1	1	0	2	1	2	1	1	0	1	3	2	1	2	0
1109	1	11	0	0	1	61.3542	31.9064	55.3556	63.8539	0	0	0	0	0	1	1	0	0	1	1	0	2	1	2	1	4	3	2	0	1	4	0	0	0	0	0	3	2	0
1110	1	11	0	0	0	47.4653	55.3177	55.3556	66.3728	0	1	0	0	0	0	1	1	1	1	2	3	1	0	2	1	2	0	0	0	1	1	0	2	1	4	4	0	1	0
1111	1	11	0	0	0	43.9931	35.2508	57.5778	61.335	0	1	0	0	0	0	1	0	0	1	1	2	3	1	2	2	1	1	0	2	1	0	0	1	4	2	2	0	2	0
1112	1	11	0	0	0	57.8819	38.5953	44.2444	43.7028	0	0	0	1	0	0	1	0	1	1	3	3	2	1	0	1	2	0	1	0	2	2	1	1	0	0	3	0	4	0
1113	1	11	0	0	0	47.4653	48.6288	42.0222	36.1461	1	1	0	1	0	1	1	1	1	1	3	2	1	2	0	0	1	2	4	1	0	1	1	0	1	1	4	0	3	0
1114	1	11	0	0	0	47.4653	48.6288	42.0222	36.1461	1	1	0	1	0	1	1	1	1	1	3	2	1	2	0	0	1	2	4	1	0	1	1	0	1	1	4	0	3	0
1115	1	12	0	0	0	36.9388	48.2569	48.7131	42.0876	1	1	0	1	0	1	1	1	1	1	1	3	2	3	2	0	2	0	1	2	2	0	2	0	0	2	1	1	4	3
1116	1	12	0	0	1	57.3469	36.0245	57.1519	54.9742	1	0	0	0	0	0	1	1	1	1	2	0	3	1	2	1	0	2	0	2	3	0	2	1	2	0	2	1	3	2
1117	1	12	0	0	1	57.3469	23.792	67.7004	54.9742	1	0	0	0	1	0	1	1	1	1	2	0	1	3	2	4	0	1	0	1	2	3	0	0	0	3	0	4	2	3
1118	1	12	0	0	0	36.9388	39.0826	57.1519	39.5103	1	0	0	1	0	0	1	1	1	0	2	1	1	1	2	2	1	0	1	1	1	3	2	1	2	1	0	2	3	0
1119	1	12	0	0	0	47.1429	26.8502	55.0422	57.5515	0	0	0	1	0	1	1	1	1	1	2	1	3	0	2	1	0	0	2	1	1	2	0	0	3	0	3	2	3	2
1120	1	12	0	0	1	57.3469	36.0245	61.3713	49.8196	1	0	0	1	0	0	1	1	0	0	2	3	4	2	0	1	2	0	0	0	1	4	2	0	3	0	0	0	3	0
1121	1	12	0	0	1	47.1429	36.0245	50.8228	31.7784	1	1	0	1	1	1	1	1	1	1	3	2	1	2	0	0	1	2	4	1	0	1	1	0	1	1	4	0	3	0
1122	1	13	0	0	0	44.9851	36.7308	41.802	57.8767	1	0	0	0	0	0	1	1	0	0	1	1	0	2	2	0	0	1	2	3	3	2	4	1	3	0	2	0	2	1
1123	1	13	0	0	0	50.9552	33.5256	65.5644	44.1781	1	1	1	1	0	1	1	1	1	1	1	2	0	3	2	1	0	1	4	0	2	1	1	4	2	0	1	0	1	0
1124	1	13	0	0	1	42	62.3718	51.703	46.4612	1	0	0	0	0	0	1	1	0	1	2	2	2	1	2	0	0	1	2	1	3	1	0	1	3	1	0	0	4	1
1125	1	13	0	0	1	39.0149	52.7564	35.8614	57.8767	1	1	0	1	0	0	0	0	1	1	2	0	0	1	2	0	0	0	2	1	0	0	4	4	2	2	1	4	0	0
1126	1	13	0	0	1	53.9403	27.1154	53.6832	37.3288	0	0	0	0	0	0	1	0	1	1	3	4	3	2	2	2	1	1	2	1	1	1	0	1	1	0	1	0	1	0
1127	1	13	0	1	0	62.8955	17.5	53.6832	28.1963	0	1	1	0	0	0	1	0	0	1	2	1	3	1	0	0	2	1	3	1	1	2	1	3	1	1	2	0	2	0
1128	1	13	0	0	0	44.9851	43.141	49.7228	69.2922	1	0	0	0	0	0	0	0	0	1	1	0	1	2	2	0	2	3	3	1	3	0	0	3	4	1	0	0	0	0
1129	1	13	0	0	0	39.0149	39.9359	39.8218	64.726	0	0	0	0	0	1	1	0	0	1	3	1	1	2	2	1	2	3	1	1	2	1	1	1	1	0	1	0	4	0
1130	1	13	0	0	1	68.8657	36.7308	53.6832	53.3105	1	0	0	1	0	1	1	0	1	1	2	1	2	1	2	1	3	2	1	2	1	2	0	1	2	3	0	0	1	0
1131	1	13	0	0	0	39.0149	43.141	73.4851	30.4795	0	1	0	1	0	0	1	0	0	1	3	2	1	1	1	1	1	1	2	2	2	2	1	1	0	1	2	0	2	2
1132	1	14	0	0	1	64.8214	38.4731	62.8367	41.6776	1	1	0	0	0	0	1	1	1	1	2	3	3	1	2	2	1	0	0	2	0	1	2	1	0	0	1	1	4	1
1133	1	14	0	0	1	46.9643	38.4731	48.551	43.8562	1	1	1	1	0	0	1	0	1	1	3	1	1	0	2	0	0	0	2	0	3	2	2	0	4	2	0	0	4	0
1134	1	14	0	0	0	43.3929	44.4611	56.7143	48.2135	0	0	0	1	0	1	1	1	1	1	2	1	2	2	1	1	0	1	1	0	3	3	2	0	2	1	1	2	2	2
1135	1	14	0	0	1	54.1071	44.4611	56.7143	46.0349	1	1	0	0	0	0	1	0	1	1	2	2	1	1	2	1	2	2	2	1	1	1	0	1	3	0	1	1	3	1
1136	1	14	0	0	0	50.5357	50.4491	60.7959	54.7495	1	0	0	1	0	1	1	1	1	1	2	1	1	1	2	2	0	1	1	1	1	1	2	2	2	2	2	0	1	2
1137	1	15	0	0	1	48.2168	60.4739	57.2134	49.4977	1	0	0	1	0	0	1	1	1	1	4	2	3	1	2	1	0	1	1	0	1	1	1	1	1	1	2	0	2	1
1138	1	15	0	0	0	51.7133	43.8863	51.2846	44.9315	1	1	0	0	0	0	0	0	1	1	1	3	2	1	2	2	1	3	1	1	1	1	0	3	2	0	1	0	1	1
1139	1	15	0	0	0	41.2238	55.7346	59.1897	38.0822	1	1	0	1	0	1	1	1	1	1	3	2	2	2	1	3	1	1	2	1	2	1	1	0	2	1	0	1	1	1
1140	1	15	0	0	0	69.1958	36.7773	59.1897	42.6484	1	1	1	1	0	0	1	1	0	0	2	2	1	1	2	1	2	2	1	2	2	1	2	1	2	2	1	0	1	0
1143	0	7	0	0	0	57.8113	38.7347	43.726	15.6977	1	0	0	0	0	1	1	0	0	1	3	2	1	2	1	0	1	2	4	1	0	1	1	0	1	1	4	0	3	0
1145	0	8	0	0	0	39.6985	56.6092	45.3883	49.1785	0	0	0	0	0	1	1	0	0	1	3	2	2	1	2	3	1	1	1	2	1	1	2	1	1	0	1	1	2	1
1146	0	9	0	0	0	55	43.8535	48.2889	39.6333	1	0	0	0	0	1	1	0	0	1	1	1	1	2	2	1	1	1	3	1	1	3	3	2	1	1	1	1	1	0
1149	0	10	0	0	0	38.1364	32.8041	49.5354	50.9002	1	0	0	0	0	1	1	1	1	1	2	4	2	1	2	2	1	2	1	1	1	0	2	1	2	1	2	0	1	0
1150	0	10	0	0	1	65.4091	36.1824	38.4735	38.7348	1	0	0	0	0	1	1	0	1	1	1	0	1	0	2	4	2	0	1	0	3	0	2	0	4	0	3	0	3	0
1152	0	10	0	0	1	51.7727	39.5608	42.8982	26.5693	1	1	0	1	0	1	1	1	1	1	3	2	1	2	1	0	1	2	4	1	0	1	1	0	1	1	4	0	3	0
1153	0	10	0	1	1	74.5	32.8041	47.323	50.9002	1	0	0	1	0	1	1	1	1	1	1	3	2	1	1	1	0	2	2	1	1	2	4	2	1	1	0	0	1	2
1154	0	10	0	0	1	60.8636	26.0473	56.1726	46.0341	1	0	1	0	0	0	1	0	0	1	2	1	2	1	2	2	1	2	1	1	2	3	2	2	1	0	2	0	0	0
1155	0	10	0	0	0	47.2273	46.3176	42.8982	24.1363	1	1	0	1	0	1	1	1	1	1	3	2	1	2	0	1	1	2	4	1	0	1	1	0	1	1	4	0	3	0
1156	0	10	0	0	1	56.3182	39.5608	45.1106	26.5693	1	0	1	1	0	1	1	1	1	1	3	2	1	2	0	1	1	2	4	1	0	1	1	0	1	1	4	0	3	0
1157	0	10	0	1	1	60.8636	49.6959	62.8097	38.7348	0	0	0	1	0	1	1	1	0	1	1	2	1	1	0	2	1	2	1	2	2	2	1	0	1	2	3	1	3	2
1158	0	11	0	0	1	47.3264	51.679	39.076	31.6832	1	1	0	1	0	1	1	1	1	1	3	2	2	2	0	0	1	2	4	1	0	1	1	0	1	1	4	0	3	0
1160	0	11	0	0	1	50.7986	51.679	45.2361	37.6238	1	1	0	1	0	1	1	1	1	1	3	2	1	2	1	0	1	2	4	1	0	1	1	0	1	1	4	0	3	0
1161	0	11	0	0	0	43.8542	46.7407	51.3963	53.4653	1	1	0	1	0	1	1	1	1	1	1	3	2	3	1	2	2	1	0	1	4	1	1	0	1	2	1	1	3	1
1162	0	11	0	0	0	54.2708	34.3951	49.3429	51.4851	1	0	0	1	0	0	1	1	0	0	1	2	3	2	2	1	0	1	2	2	2	1	1	1	2	1	2	1	2	2
1163	0	11	0	0	0	61.2153	39.3333	71.9302	55.4455	0	0	0	1	0	0	1	1	1	1	1	2	4	3	2	1	0	1	1	3	3	2	2	2	1	0	0	1	1	1
1164	0	11	0	0	1	40.3819	34.3951	59.6099	31.6832	0	0	0	1	0	0	1	1	1	1	1	2	1	1	0	2	1	2	2	2	2	1	1	2	2	2	1	2	2	2
1165	0	12	0	0	0	43.6744	37.4342	45.0325	65.7907	1	0	0	1	0	0	1	1	1	1	2	1	1	4	2	1	0	1	4	1	1	1	2	1	1	1	2	1	3	1
1166	0	12	0	1	0	66.9302	47.3026	62.3861	58.814	1	0	1	1	0	1	1	1	1	1	3	3	4	3	2	1	1	1	1	1	1	1	1	1	1	1	1	0	1	0
1167	0	12	0	0	1	52.9767	53.8816	64.5553	42.5349	1	1	0	1	0	1	1	0	1	0	2	1	2	2	2	1	0	0	2	3	1	3	1	2	2	1	0	1	3	1
1168	0	12	0	0	0	48.3256	37.4342	42.8633	49.5116	0	1	1	1	0	1	1	1	1	0	1	1	2	1	2	1	1	1	3	2	0	1	2	1	2	1	1	1	3	1
1172	0	12	0	0	1	48.3256	40.7237	47.2017	51.8372	1	0	0	0	0	0	1	0	0	0	3	2	2	1	2	0	0	2	4	2	1	2	1	0	2	2	0	0	2	0
1173	0	12	0	0	0	57.6279	50.5921	42.8633	44.8605	1	1	1	1	0	0	1	1	1	0	3	1	2	1	2	1	0	1	2	1	1	1	1	2	2	1	1	3	2	0
1174	0	12	0	0	0	43.6744	44.0132	36.3557	30.907	1	1	0	1	0	1	1	1	1	1	3	2	1	1	2	0	0	2	4	1	0	1	1	0	1	1	4	0	3	0
1175	0	13	0	0	0	41.7606	37.5696	57.5992	56.9715	0	0	0	0	0	0	1	1	1	1	3	2	1	2	2	2	1	1	1	1	1	2	1	1	1	1	2	0	2	2
1176	0	13	0	0	0	45.2817	45.1646	51.3361	54.939	1	1	0	1	0	1	1	1	1	1	3	2	2	2	2	2	0	1	0	0	1	2	2	1	1	1	1	2	3	2
1177	0	13	0	0	0	45.2817	27.443	70.1253	36.6463	1	0	0	1	0	0	1	1	1	1	2	1	1	3	2	0	2	1	4	1	0	2	3	0	3	0	0	0	3	1
1178	0	14	0	0	0	41.4768	49.4931	46.3673	68.8971	1	1	1	1	1	0	1	0	0	1	3	2	3	1	0	0	2	1	4	1	1	3	0	0	0	2	2	0	3	0
1179	0	14	0	0	0	45.6962	37.9724	44.3265	59.0931	1	0	0	1	0	0	1	0	1	1	3	2	2	1	1	1	1	1	2	2	2	3	2	0	1	0	2	0	3	0
1180	0	14	0	0	0	41.4768	42.5806	50.449	66.4461	1	0	0	1	0	0	1	0	0	1	2	1	2	1	2	1	2	1	2	2	1	1	2	1	2	1	1	1	2	1
1182	0	14	0	0	0	54.135	49.4931	48.4082	46.8382	1	1	0	1	0	0	1	1	1	1	4	2	4	2	2	3	1	0	1	0	2	1	1	0	1	0	0	0	4	0
1183	0	14	0	0	0	54.135	35.6682	42.2857	44.3873	0	1	0	1	0	1	1	0	1	1	3	2	2	1	2	0	1	1	1	2	2	3	3	1	3	0	0	0	2	0
1184	0	14	0	0	0	49.9156	37.9724	62.6939	34.5833	0	0	0	1	0	1	1	1	1	1	3	2	2	1	2	2	2	1	0	1	1	2	1	0	4	0	0	0	4	0
1185	0	14	0	0	0	49.9156	40.2765	56.5714	63.9951	1	0	0	1	0	0	1	1	1	0	3	3	1	0	2	1	1	0	2	1	2	3	1	0	1	0	1	2	3	2
1186	0	14	0	0	0	54.135	26.4516	54.5306	54.1912	1	0	0	1	0	1	1	1	1	1	4	1	0	2	2	0	0	3	2	1	1	3	3	1	1	0	1	2	2	2
1187	0	14	0	1	0	41.4768	26.4516	46.3673	51.7402	1	0	0	1	0	0	1	1	0	1	2	2	1	1	2	1	3	1	4	2	2	3	2	0	1	0	0	0	2	0
1188	0	14	0	0	1	62.5738	54.1014	48.4082	44.3873	1	0	0	1	0	0	1	1	1	1	3	2	1	1	2	0	1	2	1	0	1	1	0	4	1	1	0	0	4	2
1189	0	14	0	0	0	45.6962	49.4931	50.449	49.2892	1	1	0	1	0	0	1	0	1	1	3	2	2	2	1	1	1	1	1	2	2	2	1	1	2	1	1	0	3	1
1190	0	15	0	0	1	59.087	42.0988	61.451	42.5182	1	0	0	1	0	0	1	1	1	1	3	1	1	1	2	1	1	1	2	1	1	2	1	1	3	1	1	0	3	1
1191	0	15	0	0	1	72.1304	35.9259	52.7098	42.5182	0	1	1	1	0	0	0	1	0	1	1	2	3	1	2	2	0	0	1	1	2	3	2	1	1	2	1	0	3	0
1194	0	15	0	0	1	54.7391	60.6173	47.465	59.4673	1	1	0	1	0	0	1	0	1	1	3	2	2	1	2	1	0	0	1	3	0	1	3	4	1	0	2	0	1	0
1195	0	15	0	0	1	41.6957	20.4938	42.2203	47.3608	0	0	0	0	0	0	0	0	0	0	2	2	0	1	2	0	0	1	4	2	1	2	1	3	1	1	1	0	4	0
1196	0	15	0	0	1	37.3478	42.0988	52.7098	40.0969	0	0	0	1	0	1	1	1	1	1	2	2	2	2	1	0	0	1	2	1	0	2	1	1	1	2	2	2	4	0
1197	0	15	0	0	1	46.0435	48.2716	50.9615	49.7821	1	0	0	1	0	0	0	0	0	1	4	2	1	1	2	1	1	1	2	3	2	1	1	1	1	1	0	0	4	0
1198	1	7	0	0	0	65.931	59.4878	50.3417	43.6828	0	0	0	0	0	1	1	1	1	1	0	1	2	1	1	2	1	0	4	1	2	1	1	2	2	2	2	0	0	2
1200	1	7	0	0	1	55.5862	49.7317	57.1754	46.371	0	0	0	1	0	1	1	1	1	1	3	2	2	1	2	2	1	0	1	2	2	1	0	2	2	0	2	0	4	0
1201	1	7	0	0	1	48.6897	47.2927	54.8975	51.7473	0	0	0	1	0	1	1	1	1	1	0	1	3	1	2	0	4	4	1	1	2	1	1	1	1	1	1	1	2	1
1202	1	7	0	0	0	69.3793	44.8537	59.4533	49.0591	1	1	1	0	1	1	0	0	1	1	1	2	1	2	2	1	1	2	1	2	2	1	3	2	1	1	2	0	1	1
1203	1	8	0	0	1	43.4448	41.0263	49.7201	51.0204	0	0	0	1	1	1	0	0	0	1	2	3	1	0	2	0	2	0	2	2	2	0	2	3	1	1	1	0	4	0
1204	1	9	0	0	0	46.4923	48.3136	49.1522	61.5891	1	1	1	1	0	1	1	1	1	1	3	1	2	2	2	2	2	0	1	2	1	1	2	0	4	0	0	0	4	0
1206	1	10	0	0	0	65.0177	36.3056	56.3991	41.8124	1	1	1	1	0	1	0	0	0	1	2	3	1	1	1	1	1	2	1	3	1	1	1	1	3	1	3	0	0	0
1207	1	10	0	0	1	68.5512	30.75	56.3991	31.1514	1	1	0	0	0	0	0	0	0	1	0	1	2	0	2	1	3	1	2	3	4	1	1	2	1	2	1	1	0	2
1208	1	10	0	0	1	47.3498	47.4167	60.7375	46.0768	1	0	0	0	0	0	1	0	1	1	3	3	2	1	2	1	2	2	1	3	2	2	1	0	1	0	1	0	2	0
1209	1	11	0	0	1	68.2986	41.9398	50.9111	48.7406	1	0	1	0	0	1	0	1	0	1	1	3	2	1	2	1	2	2	2	1	2	2	2	2	0	0	2	0	0	0
1211	1	11	0	0	1	47.4653	41.9398	57.5778	48.7406	1	1	0	0	0	1	1	1	0	1	3	2	1	3	2	0	1	2	1	3	2	1	1	0	1	1	4	0	3	0
1212	1	11	0	0	1	61.3542	38.5953	55.3556	51.2594	1	0	0	1	0	1	1	0	1	0	0	1	2	3	2	1	0	1	2	3	2	1	3	1	2	2	2	0	0	0
1213	1	11	0	0	1	68.2986	28.5619	59.8	51.2594	1	0	0	0	0	1	1	0	1	1	2	1	2	1	2	1	2	1	2	1	3	1	1	1	1	2	1	2	1	2
1214	1	11	0	0	1	57.8819	18.5284	62.0222	43.7028	0	0	0	0	0	1	1	0	1	1	0	2	0	0	2	2	2	2	2	1	2	0	2	1	3	2	1	1	2	0
1215	1	11	0	0	0	40.5208	45.2843	39.8	36.1461	1	1	0	1	0	1	1	1	1	1	3	2	2	2	0	0	1	2	4	1	0	1	1	0	1	1	4	0	3	0
1216	1	12	0	0	0	50.5442	14.6177	50.8228	31.7784	1	0	0	1	0	1	1	0	1	0	1	2	1	1	2	1	1	1	1	2	1	1	1	1	4	3	2	1	1	1
1217	1	13	0	0	0	50.9552	30.3205	37.8416	62.4429	1	1	1	1	1	0	0	0	1	1	1	2	1	1	2	1	1	1	2	2	2	2	1	1	1	1	1	1	2	4
1218	1	13	0	0	1	44.9851	49.5513	47.7426	57.8767	1	0	0	1	0	1	1	0	0	1	2	1	3	1	2	1	2	1	3	1	3	2	1	1	0	0	2	0	2	0
1219	1	13	0	0	0	56.9254	49.5513	53.6832	55.5936	0	0	0	1	0	0	1	0	1	1	2	2	3	1	2	0	0	2	1	3	4	0	0	4	1	1	1	0	3	0
1220	1	13	0	0	1	68.8657	46.3462	67.5446	44.1781	1	0	0	1	0	1	1	0	1	1	1	2	2	1	2	1	1	2	1	1	2	2	2	2	2	1	1	0	2	0
1223	1	14	0	0	1	50.5357	44.4611	46.5102	59.1068	0	0	0	1	0	0	1	1	0	1	0	2	1	2	2	0	0	1	2	2	1	1	4	4	2	2	0	0	0	1
1225	1	14	0	0	0	61.25	44.4611	52.6327	30.7843	1	0	0	1	0	1	1	1	1	1	2	3	2	1	1	0	1	2	1	2	1	2	1	1	2	1	1	0	4	0
1226	1	14	0	0	0	68.3929	44.4611	73.0408	26.427	1	1	0	1	0	0	1	1	1	1	2	1	3	2	2	3	0	3	0	0	0	1	1	1	4	1	0	2	0	2
1227	1	14	0	0	1	82.6786	47.4551	52.6327	50.3922	1	0	0	1	0	0	1	1	1	0	3	0	3	1	2	0	2	1	0	1	1	1	1	2	1	1	2	3	3	3
1228	1	15	0	0	0	37.7273	50.9953	47.332	60.9132	0	1	0	1	0	0	1	0	1	1	2	3	2	1	1	1	1	2	3	1	2	1	0	3	3	0	0	0	2	0
1229	1	15	0	0	1	69.1958	41.5166	51.2846	44.9315	1	1	0	1	0	0	0	0	1	1	4	3	2	1	0	2	1	1	0	1	1	0	2	0	3	1	4	0	1	1
1230	0	7	0	0	1	69.1321	67.3061	82.0822	-11.4341	1	1	0	1	0	0	1	1	1	1	1	1	1	1	2	1	2	1	1	2	2	2	1	1	1	2	2	1	3	3
1231	0	7	0	0	0	57.8113	26.4898	60.1644	27.3256	0	1	1	0	1	1	1	1	1	0	3	2	3	1	2	2	0	0	2	2	2	1	2	0	1	1	0	2	3	3
1232	0	7	0	0	1	72.9057	26.4898	73.863	23.4496	0	1	0	0	0	0	0	1	1	1	4	3	2	0	2	0	0	0	0	0	0	4	2	1	3	1	2	0	1	2
1233	0	7	0	0	0	50.2642	46.898	49.2055	11.8217	1	1	0	0	0	1	1	0	0	1	3	2	1	2	2	0	0	2	4	1	1	1	1	1	1	1	4	0	3	0
1234	0	8	0	0	1	74.8744	45.1149	55.0971	29.3484	0	0	0	0	1	1	1	1	1	0	2	1	2	1	2	2	1	2	1	2	1	2	1	2	2	1	1	1	2	1
1235	0	8	0	0	0	59.799	42.2414	59.9515	32.1813	0	0	0	0	0	1	1	1	1	1	2	3	1	0	2	0	2	0	2	1	0	2	2	1	2	0	4	0	3	0
1237	0	9	0	0	1	39.375	56.5924	39.4	56.3	1	0	0	1	0	0	1	0	1	1	2	1	3	1	2	1	0	0	4	1	1	1	3	1	1	1	2	0	4	0
1238	0	9	0	0	1	44.5833	40.6688	50.5111	59.6333	0	0	0	0	0	1	1	0	0	1	2	1	3	0	1	1	0	3	4	1	3	1	1	2	0	0	1	0	4	0
1239	0	9	0	0	0	55	34.2994	52.7333	46.3	0	0	0	0	0	0	1	0	0	0	4	2	1	1	2	0	1	1	2	3	3	2	1	0	2	1	1	0	3	1
1240	0	10	0	0	1	65.4091	42.9392	56.1726	43.601	1	0	0	0	0	1	1	0	0	0	0	1	2	1	2	2	2	1	1	0	4	4	2	2	1	2	0	0	0	0
1241	0	10	0	0	0	47.2273	36.1824	45.1106	24.1363	1	1	0	1	1	1	1	1	1	1	3	2	1	2	2	0	1	2	4	1	0	1	1	0	1	1	4	0	3	0
1242	0	10	0	0	0	42.6818	42.9392	45.1106	63.0657	0	0	0	1	0	0	1	0	1	0	2	3	4	1	2	0	0	1	3	1	0	4	1	0	2	3	0	0	0	0
1243	0	10	0	0	0	42.6818	39.5608	49.5354	36.3017	1	1	0	0	0	1	1	1	1	1	3	2	1	2	1	1	1	2	4	1	0	1	1	0	1	1	4	0	3	0
1244	0	10	0	0	0	47.2273	53.0743	56.1726	55.7664	1	0	0	1	0	0	1	0	1	1	2	1	2	1	2	1	1	1	1	3	2	2	1	1	1	3	1	2	2	2
1245	0	10	0	0	1	38.1364	49.6959	51.7478	43.601	0	0	0	0	0	1	1	0	1	1	3	3	2	0	2	0	1	0	4	0	0	2	0	1	0	1	1	3	4	1
1246	0	11	0	0	0	43.8542	44.2716	49.3429	53.4653	0	0	1	1	0	0	1	0	0	1	1	2	3	2	3	1	0	2	3	3	1	1	1	1	2	1	1	0	1	0
1247	0	11	0	1	1	71.6319	39.3333	45.2361	61.3861	0	0	1	1	0	1	1	0	1	1	2	2	1	2	2	2	2	1	1	2	0	1	0	2	2	2	2	1	2	0
1249	0	11	0	0	1	57.7431	46.7407	41.1294	31.6832	1	1	1	1	0	1	1	1	1	1	3	2	1	2	0	0	1	2	4	1	0	2	1	0	1	1	4	0	4	0
1250	0	11	0	0	1	57.7431	34.3951	39.076	35.6436	1	1	0	1	0	1	1	1	1	1	3	2	1	1	0	0	1	2	4	0	0	0	4	0	1	1	4	0	4	0
1251	0	11	0	0	0	64.6875	41.8025	55.5031	43.5644	1	1	1	1	0	1	1	1	1	1	2	0	2	3	2	0	2	3	0	1	2	2	1	2	1	3	1	1	2	0
1252	0	12	0	0	1	48.3256	34.1447	68.8937	51.8372	1	0	0	1	0	0	1	0	1	1	1	2	1	3	1	0	0	3	1	0	2	3	4	3	1	1	0	0	4	0
1253	0	12	0	0	1	43.6744	53.8816	42.8633	58.814	0	0	0	0	0	0	0	0	0	1	2	2	2	1	2	1	1	2	2	2	2	2	2	1	1	1	1	1	1	2
1254	0	12	0	0	0	52.9767	40.7237	58.0477	51.8372	1	1	1	1	1	0	0	1	1	1	0	1	3	0	2	1	2	3	4	0	0	0	1	2	1	1	4	1	1	0
1257	0	12	0	0	1	52.9767	44.0132	51.5401	54.1628	1	1	0	0	0	1	0	0	1	1	3	1	2	1	2	2	1	2	4	3	2	1	0	1	1	1	2	0	1	0
1258	0	12	0	0	1	43.6744	30.8553	53.7093	40.2093	0	0	0	0	0	0	0	1	1	1	1	2	3	1	2	0	0	2	2	0	3	2	4	0	0	1	1	0	4	0
1259	0	12	0	0	0	48.3256	50.5921	55.8785	35.5581	1	0	0	1	0	0	1	0	1	1	2	1	1	2	2	2	1	1	1	1	2	2	3	2	2	1	1	1	2	0
1260	0	12	0	0	1	48.3256	44.0132	40.6941	26.2558	1	1	0	1	0	1	1	1	1	1	3	2	1	2	2	0	0	2	4	1	1	1	1	1	1	1	4	0	3	0
1261	0	13	0	0	0	66.4085	45.1646	70.1253	44.7764	0	1	0	1	0	0	1	0	0	1	1	2	2	3	2	0	2	1	1	2	1	0	2	2	3	1	1	2	2	1
1262	0	13	0	1	0	55.8451	45.1646	68.0376	48.8415	1	0	0	1	0	0	1	1	0	1	3	1	0	0	1	0	4	3	0	4	2	0	1	2	4	1	1	1	1	1
1263	0	13	0	0	0	48.8028	35.038	40.8977	34.6138	1	1	1	1	0	0	1	1	0	0	2	2	2	1	2	2	2	1	2	1	1	1	1	1	2	1	1	1	3	1
1264	0	13	0	0	0	45.2817	52.7595	55.5115	36.6463	1	0	0	1	0	0	1	0	1	1	2	1	1	2	2	2	1	1	1	1	2	2	3	2	2	1	1	1	2	0
1266	0	13	0	0	0	48.8028	52.7595	57.5992	42.7439	0	0	0	1	0	1	1	0	0	1	2	2	3	2	2	1	0	1	2	0	2	1	2	2	3	1	0	0	2	1
1268	0	13	0	0	0	45.2817	40.1013	45.0731	50.874	1	0	0	1	0	1	1	1	1	1	2	1	2	1	2	1	1	2	3	2	1	2	1	0	1	2	1	0	3	1
1269	0	13	0	0	0	48.8028	60.3544	65.9499	50.874	0	0	0	1	0	1	1	0	1	1	1	2	2	3	2	1	1	2	1	2	1	2	1	2	3	1	1	0	0	0
1271	0	13	0	0	1	48.8028	37.5696	40.8977	48.8415	1	0	0	1	0	0	1	1	1	1	2	3	2	1	2	1	0	1	3	2	1	1	3	1	1	2	0	0	2	1
1272	0	13	0	0	0	48.8028	32.5063	42.9854	56.9715	1	0	0	1	0	1	1	1	1	1	1	2	1	1	2	1	1	1	1	1	1	2	2	1	2	1	2	3	3	3
1273	0	14	0	0	1	54.135	51.7972	66.7755	34.5833	1	0	0	1	0	1	1	1	1	1	1	1	2	1	2	1	2	1	1	1	2	3	3	1	1	2	1	1	2	1
1274	0	14	0	0	0	49.9156	42.5806	58.6122	49.2892	1	1	1	1	0	0	1	0	0	1	2	1	1	1	2	1	2	1	2	0	2	2	2	2	1	0	1	1	3	2
1275	0	14	0	0	1	54.135	51.7972	60.6531	29.6814	1	0	0	1	1	0	0	0	0	1	3	2	2	2	2	0	0	1	1	0	4	1	2	1	4	1	0	0	0	1
1276	0	14	0	0	1	49.9156	49.4931	50.449	49.2892	1	0	0	1	0	0	0	0	1	1	3	2	1	2	2	2	0	0	4	0	0	3	0	0	4	0	4	0	2	0
1277	0	14	0	0	0	41.4768	56.4055	38.2041	68.8971	1	0	0	1	0	0	0	0	0	1	2	2	1	2	2	1	2	1	1	1	1	2	4	2	1	1	1	1	1	1
1278	0	15	0	1	1	50.3913	39.0123	63.1993	27.9903	1	0	0	1	0	0	1	1	1	1	3	2	2	3	1	1	1	2	1	2	1	1	1	2	2	1	1	0	2	1
1279	0	15	0	1	0	33	35.9259	57.9545	54.6247	1	0	1	1	0	0	1	1	1	1	3	3	2	3	2	1	0	0	1	1	1	1	2	4	1	1	1	0	3	1
1280	0	15	0	0	0	41.6957	42.0988	43.9685	47.3608	1	0	0	1	0	1	1	0	0	1	3	2	2	1	1	1	0	1	4	2	1	1	3	3	1	1	1	0	1	0
1281	0	15	0	0	0	59.087	42.0988	56.2063	52.2034	1	0	1	1	0	0	1	0	1	1	3	2	3	3	2	1	1	1	2	0	1	3	1	0	2	0	0	0	2	2
1282	0	15	0	0	1	50.3913	39.0123	63.1993	40.0969	1	1	1	1	0	0	0	1	1	1	3	4	4	1	2	1	0	0	0	2	4	3	1	0	0	0	1	0	2	2
1283	0	15	0	1	0	50.3913	45.1852	57.9545	42.5182	1	0	0	1	0	0	1	0	1	1	3	1	2	1	2	0	1	1	2	1	2	3	3	0	3	0	0	1	2	2
1284	0	15	0	0	0	54.7391	45.1852	59.7028	44.9395	1	0	0	1	0	0	0	0	0	0	2	1	0	3	2	1	0	2	2	0	1	1	3	1	4	1	0	0	2	3
1285	0	15	0	1	1	50.3913	48.2716	52.7098	52.2034	1	1	0	1	0	1	1	1	1	1	2	3	3	2	1	4	0	1	1	0	2	3	0	0	1	0	4	0	2	0
1286	0	15	0	0	0	54.7391	39.0123	52.7098	49.7821	1	0	0	1	0	0	1	1	1	1	2	3	2	1	2	0	0	1	1	0	0	3	2	0	3	0	2	0	4	2
1287	1	7	0	0	1	52.1379	30.2195	59.4533	46.371	1	0	0	0	1	1	1	1	1	0	2	1	2	1	2	2	1	2	1	2	1	2	1	2	1	2	1	0	2	1
1288	1	7	0	0	0	52.1379	54.6098	43.508	27.5538	1	0	0	0	0	1	1	1	0	1	3	2	1	2	0	0	1	2	4	1	0	2	1	0	1	1	4	0	4	0
1289	1	8	0	0	0	46.7893	48.1862	42.0865	65.5977	1	0	0	0	0	1	0	0	1	1	2	3	1	0	2	0	0	0	1	2	0	2	3	1	3	2	3	0	1	1
1290	1	8	0	0	0	46.7893	43.4129	49.7201	53.9359	1	0	0	1	0	1	1	1	1	1	3	2	2	1	2	2	1	0	1	2	0	2	0	2	2	0	2	0	4	0
1291	1	9	0	0	0	37.2615	51.2722	38.2826	61.5891	1	0	0	0	0	0	1	0	0	1	1	2	1	1	2	2	1	2	3	1	3	0	1	0	2	0	3	0	2	2
1292	1	9	0	0	0	43.4154	57.1893	42.6304	32.5194	1	1	1	1	0	1	1	1	1	1	3	2	1	2	0	0	1	2	4	1	4	0	1	0	1	1	4	0	3	0
1293	1	9	0	0	1	58.8	33.5207	49.1522	46.0853	1	0	0	0	0	0	1	0	1	1	1	2	3	0	2	1	0	1	2	1	3	1	2	2	0	1	2	0	4	0
1295	1	9	0	0	1	52.6462	60.1479	55.6739	57.7132	1	0	0	0	0	0	1	0	0	1	1	2	4	0	2	1	2	3	0	1	0	1	0	2	3	4	0	0	1	0
1296	1	9	0	0	0	43.4154	42.3964	42.6304	48.0233	1	0	0	0	0	0	1	0	1	1	3	2	1	0	2	1	2	1	3	0	3	0	0	4	2	0	0	0	3	0
1297	1	9	0	0	0	58.8	42.3964	68.7174	46.0853	1	0	0	0	0	0	1	1	1	1	1	0	2	1	1	1	1	2	2	0	1	1	2	4	0	2	1	3	2	4
1298	1	10	0	1	0	54.417	39.0833	47.7223	39.6802	1	0	0	0	0	0	1	0	1	1	2	2	1	3	2	1	0	3	1	0	1	0	1	4	4	0	0	0	0	2
1299	1	10	0	0	1	43.8163	41.8611	39.0456	56.7377	1	0	1	1	0	1	1	1	1	1	0	0	2	2	2	2	2	0	1	0	0	2	4	0	4	0	0	0	4	4
1300	1	10	0	0	0	57.9505	39.0833	56.3991	50.3412	0	1	0	1	1	0	1	0	0	1	0	1	2	3	2	2	2	1	1	2	1	2	1	1	2	2	1	2	1	2
1301	1	10	0	0	1	61.4841	36.3056	47.7223	52.4733	1	0	0	0	0	1	1	1	1	1	0	1	1	1	1	1	2	3	4	1	2	1	3	0	1	2	1	0	1	3
1302	1	10	0	0	1	50.8834	30.75	54.2299	46.0768	0	0	0	1	0	0	1	0	1	1	2	4	1	1	2	0	1	0	1	0	2	3	3	0	0	3	3	0	0	1
1303	1	10	0	0	0	40.2827	47.4167	47.7223	29.0192	1	1	0	1	0	1	1	1	1	1	3	2	1	0	0	1	1	2	4	1	0	1	1	4	1	1	1	0	3	0
1304	1	11	0	0	0	47.4653	41.9398	64.2444	41.1839	0	0	0	0	0	0	1	1	1	1	3	3	4	4	2	3	0	0	0	1	2	3	0	0	0	1	1	1	3	1
1305	1	11	0	0	1	50.9375	48.6288	50.9111	56.2972	0	0	0	1	0	0	1	1	0	1	4	1	3	0	0	1	1	0	2	2	0	1	0	4	2	1	0	1	3	2
1306	1	11	0	0	0	40.5208	51.9732	42.0222	66.3728	0	0	0	0	0	0	1	0	0	1	1	1	0	0	2	1	2	1	0	0	3	4	1	2	2	3	3	0	1	0
1307	1	11	0	1	0	75.2431	41.9398	50.9111	28.5894	0	0	0	0	0	0	1	1	0	1	1	1	2	1	2	2	0	1	4	3	0	1	1	3	4	1	0	0	1	0
1308	1	11	0	0	1	33.5764	41.9398	42.0222	28.5894	1	1	0	0	0	1	1	1	1	1	2	2	1	2	2	2	2	1	1	2	0	1	2	0	1	1	4	0	3	0
1309	1	11	0	0	0	40.5208	38.5953	64.2444	53.7783	1	0	1	1	0	0	1	1	0	1	2	1	4	1	2	1	1	2	3	1	2	1	2	1	2	0	0	1	2	0
1310	1	11	0	0	1	40.5208	45.2843	42.0222	38.665	1	1	0	1	1	1	1	1	1	1	3	2	2	2	0	1	1	2	4	1	2	0	1	0	1	1	4	0	3	0
1312	1	12	0	1	0	64.1497	42.1407	50.8228	34.3557	1	0	0	1	0	1	1	0	1	1	0	3	1	3	2	0	1	1	3	2	1	2	1	1	4	1	1	1	2	1
1313	1	12	0	0	1	57.3469	29.9083	61.3713	44.6649	0	0	0	1	0	0	0	0	0	0	2	0	1	3	2	1	0	3	1	3	4	1	2	1	1	3	2	0	2	0
1314	1	13	0	0	1	42	43.141	39.8218	64.726	1	0	0	1	0	1	1	1	1	1	3	2	1	2	2	2	1	0	1	2	0	1	2	2	2	0	2	0	4	0
1315	1	13	0	0	1	65.8806	55.9615	57.6436	51.0274	1	0	0	1	0	0	1	0	1	1	2	0	2	0	2	2	2	3	2	0	4	0	0	3	3	2	0	0	0	0
1316	1	13	0	0	0	47.9701	52.7564	47.7426	55.5936	1	0	0	1	0	0	1	0	0	1	1	3	4	3	2	2	1	1	2	1	3	1	3	1	1	2	3	4	1	2
1317	1	13	0	0	0	62.8955	46.3462	57.6436	46.4612	1	1	1	1	0	0	1	0	0	1	3	3	2	1	3	3	1	1	2	1	2	3	0	0	1	0	0	0	2	1
1318	1	13	0	0	0	36.0299	27.1154	35.8614	35.0457	1	0	0	0	0	0	0	1	1	1	1	1	3	1	2	1	1	0	2	0	2	0	2	2	1	3	3	0	1	2
1319	1	13	0	1	0	65.8806	30.3205	53.6832	44.1781	1	0	0	0	0	1	1	0	0	1	1	2	3	1	2	1	1	2	2	1	1	1	1	2	1	2	1	1	2	2
1320	1	13	0	0	0	47.9701	49.5513	63.5842	53.3105	1	0	0	1	0	0	1	1	1	1	2	1	3	3	2	0	0	0	0	0	0	4	1	1	4	1	0	2	4	4
1321	1	13	0	0	0	47.9701	36.7308	57.6436	55.5936	1	0	0	1	0	0	0	0	0	1	2	2	1	1	2	3	0	2	2	3	3	0	0	0	3	2	1	1	3	0
1322	1	13	0	0	1	39.0149	33.5256	35.8614	57.8767	0	0	0	1	0	0	0	0	0	1	2	3	1	0	2	1	0	2	2	0	1	2	1	3	1	2	1	0	1	2
1323	1	14	0	0	0	54.1071	29.491	73.0408	37.3203	1	0	0	0	0	0	0	0	1	1	3	1	2	2	1	0	2	2	1	2	2	2	2	1	1	1	1	2	1	3
1325	1	15	0	0	0	65.6993	55.7346	65.1186	38.0822	1	0	0	0	0	0	1	1	1	1	0	3	1	1	2	1	1	1	2	1	1	1	2	1	2	3	1	2	3	1
1326	1	15	0	0	1	58.7063	50.9953	57.2134	33.516	1	0	0	1	0	0	1	0	1	1	1	2	1	3	2	0	1	1	4	1	1	1	1	3	4	1	0	0	3	1
1327	1	15	0	0	0	44.7203	41.5166	59.1897	63.1963	1	1	0	1	0	0	1	0	1	1	2	2	1	2	2	1	1	1	1	1	1	2	2	2	3	2	2	0	1	0
1328	1	15	0	0	0	44.7203	50.9953	43.3794	44.9315	1	0	0	1	0	0	1	1	1	1	3	3	2	1	1	1	0	2	2	1	2	2	1	1	1	1	2	1	2	1
1329	1	15	0	0	1	44.7203	17.8199	41.4032	51.7808	1	1	0	1	0	1	1	1	1	1	3	1	2	1	2	1	2	1	1	2	3	1	2	1	2	2	2	0	1	0
1330	1	15	0	0	1	62.2028	39.1469	47.332	42.6484	1	1	0	1	0	1	1	1	1	1	2	2	1	1	2	0	1	2	2	2	2	2	2	2	2	2	0	0	3	0
1331	1	15	0	1	0	62.2028	50.9953	49.3083	28.9498	0	0	0	1	0	1	0	0	0	1	1	2	0	0	2	0	0	0	4	0	4	2	0	0	4	4	4	0	0	0
1332	1	15	0	0	1	55.2098	48.6256	41.4032	38.0822	0	0	0	1	0	0	1	0	1	1	2	2	3	1	2	2	0	1	2	1	1	2	0	3	3	2	1	0	1	0
1333	0	7	0	0	0	72.9057	14.2449	71.1233	27.3256	1	1	1	0	1	0	1	0	0	0	1	2	1	2	2	1	3	1	1	2	1	1	2	1	2	2	1	2	1	3
1334	0	8	0	0	1	79.8995	30.7471	64.8058	37.847	1	1	1	0	0	1	1	1	1	1	0	3	1	3	2	3	1	2	1	1	2	0	1	2	1	3	2	1	2	1
1335	0	8	0	0	1	59.799	27.8736	55.0971	40.6799	0	0	1	0	0	0	1	0	1	1	2	3	1	1	2	2	1	1	2	2	2	1	1	0	0	0	2	4	4	4
1337	0	9	0	1	1	55	27.9299	66.0667	36.3	1	1	0	1	0	1	1	1	1	1	4	1	1	0	2	4	0	0	2	4	1	4	0	1	0	1	3	0	1	0
1338	0	9	0	0	0	44.5833	40.6688	48.2889	49.6333	1	0	1	0	0	1	1	1	1	1	0	2	2	1	2	1	1	2	2	2	0	1	0	3	2	0	4	0	4	0
1339	0	9	0	1	1	49.7917	37.4841	52.7333	49.6333	1	0	0	1	0	0	1	0	1	1	2	0	0	1	2	2	0	1	1	2	3	4	2	1	1	3	1	1	2	3
1340	0	9	0	1	0	55	21.5605	57.1778	59.6333	0	0	1	0	0	1	1	1	1	1	1	3	3	2	2	2	0	0	4	0	0	3	2	1	1	2	1	0	3	0
1341	0	9	0	0	0	60.2083	40.6688	63.8444	52.9667	1	0	0	0	0	0	1	1	1	1	1	1	2	3	2	2	2	0	2	1	2	1	2	0	0	3	3	0	0	2
1342	0	9	0	0	0	91.4583	31.1146	54.9556	29.6333	1	0	0	1	0	1	1	1	1	1	0	1	0	1	1	1	2	3	2	1	2	1	1	1	2	2	2	2	3	4
1343	0	9	0	0	1	70.625	34.2994	59.4	22.9667	0	0	0	1	0	1	1	0	1	1	3	1	2	1	2	4	4	3	2	2	2	2	0	0	0	1	1	0	1	0
1344	0	10	0	0	1	47.2273	53.0743	65.0221	58.1995	1	0	0	1	0	1	1	1	1	1	4	4	2	3	1	3	1	0	1	1	0	3	2	0	2	0	1	0	2	0
1345	0	10	0	0	0	65.4091	32.8041	65.0221	46.0341	0	0	0	0	0	1	0	1	1	0	2	0	1	1	2	2	2	1	2	2	1	2	2	2	1	3	1	2	1	1
1346	0	10	0	0	0	60.8636	29.4257	49.5354	36.3017	1	0	0	0	0	0	0	0	1	1	3	4	2	1	2	3	1	1	1	2	1	1	2	1	1	0	1	1	2	1
1347	0	10	0	0	0	51.7727	49.6959	42.8982	26.5693	1	1	0	1	0	1	1	1	1	1	3	2	1	2	0	0	1	2	4	1	4	1	1	0	1	1	4	0	3	0
1348	0	10	0	0	0	60.8636	39.5608	60.5973	31.4355	0	0	0	0	0	1	1	1	0	1	3	2	1	2	2	1	1	3	0	2	1	0	3	2	1	0	2	3	2	3
1349	0	10	0	0	0	69.9545	9.15541	47.323	38.7348	1	0	0	0	0	0	0	1	0	0	1	1	0	2	2	3	0	1	4	1	2	0	4	3	1	3	0	0	1	1
1350	0	10	0	0	1	65.4091	29.4257	56.1726	50.9002	1	0	0	0	0	0	1	0	0	1	2	4	1	3	2	1	0	0	1	3	1	0	2	4	1	2	2	0	3	0
1351	0	10	0	0	1	51.7727	46.3176	56.1726	53.3333	0	1	0	1	0	0	1	0	1	1	1	2	1	2	2	2	1	1	2	2	1	2	2	2	1	2	1	0	2	2
1352	0	10	0	0	1	38.1364	42.9392	49.5354	63.0657	1	0	0	1	0	1	1	1	1	1	4	3	2	1	2	1	1	0	2	1	1	1	1	2	1	1	1	2	3	0
1353	0	11	0	1	1	64.6875	41.8025	41.1294	51.4851	1	1	0	1	0	1	1	0	1	1	2	3	2	1	1	1	2	0	3	1	3	3	1	0	1	1	1	2	2	1
1354	0	11	0	1	1	47.3264	51.679	45.2361	53.4653	1	0	0	1	0	0	1	0	0	1	4	1	1	2	0	2	3	0	1	2	2	3	1	1	2	2	1	0	4	0
1355	0	12	0	0	0	39.0233	30.8553	47.2017	56.4884	0	0	0	1	0	0	1	1	1	1	2	1	1	2	2	1	2	1	2	1	1	2	2	1	2	1	2	2	3	2
1356	0	12	0	0	1	43.6744	44.0132	53.7093	47.186	1	1	0	1	0	0	1	1	1	1	3	2	2	1	2	1	0	0	1	2	3	1	3	2	2	1	1	0	4	0
1357	0	12	0	0	0	57.6279	27.5658	51.5401	49.5116	0	0	0	1	0	1	1	1	1	1	1	1	1	2	2	1	0	2	1	1	3	1	3	3	4	1	2	0	2	0
1358	0	12	0	0	1	39.0233	57.1711	34.1866	63.4651	1	1	0	1	0	0	1	0	1	1	3	3	3	2	2	2	1	0	2	2	1	1	1	0	2	0	3	0	3	0
1359	0	12	0	0	0	76.2326	50.5921	64.5553	49.5116	0	0	0	0	0	0	1	1	0	1	2	1	1	2	2	4	2	1	0	1	1	4	2	0	4	0	0	0	0	2
1360	0	12	0	1	1	62.2791	40.7237	71.0629	44.8605	0	0	0	0	0	0	1	1	1	1	3	1	3	2	2	3	0	0	1	1	1	2	3	0	3	1	0	1	4	1
1361	0	12	0	0	0	39.0233	47.3026	53.7093	44.8605	0	0	0	1	0	1	1	1	1	1	3	2	1	1	2	1	2	1	3	1	2	3	1	1	1	0	1	2	2	2
1362	0	13	0	0	0	52.3239	45.1646	49.2484	46.8089	0	1	0	1	0	0	1	0	0	1	4	4	3	3	1	1	0	0	2	0	3	2	0	0	0	0	4	0	4	0
1363	0	13	0	0	0	52.3239	65.4177	57.5992	34.6138	0	0	0	0	0	0	1	1	1	1	3	4	2	4	2	1	0	0	0	1	3	3	0	0	0	0	3	3	4	1
1364	0	13	0	0	0	45.2817	32.5063	61.7745	52.9065	1	1	0	0	0	0	1	0	1	1	3	2	2	3	2	1	1	0	2	3	1	2	1	1	2	0	3	0	3	0
1365	0	13	0	0	1	73.4507	55.2911	51.3361	42.7439	1	0	0	1	0	0	1	1	0	1	3	4	2	0	2	0	2	2	1	0	0	1	2	2	2	1	0	0	2	2
1366	0	13	0	0	0	38.2394	52.7595	42.9854	50.874	0	0	0	1	0	1	1	0	1	1	3	1	3	3	2	1	0	1	2	0	1	4	1	1	2	0	2	0	4	0
1367	0	13	0	0	1	45.2817	57.8228	53.4238	50.874	1	0	0	1	0	0	1	1	0	1	3	2	3	2	2	2	1	0	2	1	1	3	2	1	2	1	1	0	1	0
1368	0	13	0	0	0	45.2817	50.2278	57.5992	59.0041	1	0	0	0	0	0	1	0	0	1	3	1	1	2	2	0	0	1	2	0	4	1	1	4	1	0	4	0	3	0
1369	0	13	0	0	1	41.7606	32.5063	32.547	54.939	1	0	0	0	0	0	1	0	0	1	1	2	4	1	2	0	2	2	1	1	0	2	3	3	2	1	0	0	2	0
1370	0	13	0	0	0	48.8028	45.1646	55.5115	34.6138	1	0	0	0	0	0	1	1	1	1	1	2	3	3	2	1	0	2	3	4	0	0	0	1	2	1	0	2	4	0
1371	0	13	0	1	0	41.7606	47.6962	59.6868	36.6463	1	0	0	0	0	0	1	1	1	1	4	2	1	4	2	1	0	3	0	0	1	2	4	1	3	0	0	0	3	0
1372	0	13	0	0	1	45.2817	55.2911	57.5992	42.7439	1	1	0	1	0	1	1	1	1	1	2	3	3	1	1	0	1	1	1	2	2	3	3	0	2	1	3	0	2	0
1373	0	13	0	0	0	59.3662	42.6329	36.7223	40.7114	0	0	0	0	1	0	1	0	1	1	2	1	2	0	2	3	2	0	3	1	2	2	3	2	1	0	0	0	3	1
1374	0	13	0	0	0	45.2817	55.2911	47.1608	61.0366	1	0	0	1	0	1	1	0	1	1	3	2	3	1	2	1	0	0	2	0	1	4	1	0	2	0	2	0	3	2
1375	0	14	0	0	1	45.6962	35.6682	56.5714	41.9363	0	1	1	1	0	0	1	1	1	1	4	2	3	1	2	1	0	1	0	1	2	1	0	1	0	2	3	2	4	0
1376	0	14	0	0	1	49.9156	44.8848	56.5714	46.8382	1	0	0	1	0	0	0	1	1	1	2	3	3	2	2	2	0	0	4	0	0	2	0	0	4	0	4	0	2	0
1377	0	14	0	0	0	45.6962	44.8848	58.6122	46.8382	1	0	0	1	0	0	1	1	1	1	2	1	3	2	2	2	0	1	3	2	0	1	2	4	1	0	2	0	1	0
1378	0	14	0	0	0	49.9156	37.9724	30.0408	61.5441	1	1	0	1	0	1	1	1	1	1	2	2	1	2	2	1	0	1	2	1	2	1	3	3	1	1	3	1	1	0
1380	0	14	0	0	0	37.2574	33.3641	52.4898	54.1912	1	0	0	1	0	0	1	0	0	1	2	1	2	3	1	1	1	1	3	2	1	1	2	1	3	2	2	0	2	0
1381	0	14	0	0	1	49.9156	37.9724	64.7347	51.7402	0	0	0	1	0	0	1	1	1	1	3	3	2	2	2	1	1	1	1	1	1	1	1	3	3	1	1	0	3	0
1382	0	14	0	0	0	41.4768	47.1889	56.5714	32.1324	1	0	0	1	0	1	1	1	1	1	3	2	2	2	2	0	0	0	0	2	0	4	1	0	4	0	0	1	4	4
1383	0	14	0	0	1	45.6962	40.2765	50.449	46.8382	1	0	0	1	0	1	1	0	0	1	1	2	2	2	2	2	0	1	2	1	1	3	3	0	3	1	1	0	3	1
1384	0	14	0	0	0	45.6962	54.1014	52.4898	34.5833	1	0	0	1	0	0	1	0	1	1	2	2	3	2	1	1	0	0	4	1	2	3	1	1	2	1	2	0	3	0
1385	0	15	0	0	0	46.0435	54.4444	54.458	42.5182	1	0	0	1	0	0	1	1	1	1	2	1	1	1	2	1	1	2	2	1	1	2	3	1	3	1	1	1	3	1
1386	0	15	0	0	0	37.3478	29.7531	61.451	49.7821	1	0	0	1	0	0	1	0	0	1	3	2	2	2	2	1	0	3	1	2	1	2	2	1	1	1	1	1	2	2
1387	1	7	0	0	1	69.3793	39.9756	61.7312	24.8656	0	0	0	0	0	0	0	1	1	1	2	1	2	1	2	2	1	3	2	1	2	1	2	2	1	2	1	1	1	1
1389	1	7	0	0	0	69.3793	42.4146	64.0091	30.2419	1	0	0	1	0	1	1	1	1	1	2	1	2	3	2	1	2	2	2	0	2	1	0	3	1	1	2	1	2	0
1390	1	7	0	0	0	45.2414	57.0488	41.2301	27.5538	1	0	0	0	0	1	0	1	0	1	3	2	1	2	0	0	1	2	4	1	4	1	1	0	1	1	4	0	3	0
1391	1	7	0	0	0	45.2414	47.2927	52.6196	54.4355	1	0	0	0	0	0	1	1	0	1	2	1	1	1	1	1	1	2	3	1	2	1	2	3	2	1	3	0	1	1
1392	1	7	0	0	1	52.1379	47.2927	52.6196	30.2419	1	1	1	1	0	0	0	1	1	0	0	1	1	1	2	1	2	2	1	1	1	3	2	3	2	1	1	1	2	3
1393	1	8	0	0	1	40.1003	31.4797	54.8092	45.1895	0	0	0	0	0	0	1	0	1	1	1	2	2	2	2	2	1	2	3	1	0	0	2	0	1	2	1	2	3	3
1394	1	8	0	1	0	46.7893	48.1862	67.5318	56.8513	1	0	0	0	0	1	1	1	0	0	2	3	3	1	1	3	0	1	0	3	3	0	1	3	4	0	3	0	0	0
1395	1	8	0	0	1	80.2341	43.4129	52.2646	33.5277	0	0	0	0	0	0	0	0	1	1	1	2	1	3	2	1	1	1	1	2	4	1	2	4	1	1	2	0	1	0
1396	1	8	0	0	0	63.5117	31.4797	54.8092	48.105	1	0	0	1	0	1	1	1	1	1	3	2	2	1	2	1	2	3	1	2	1	3	0	2	2	0	0	0	3	0
1397	1	9	0	0	0	58.8	21.6864	57.8478	48.0233	0	1	0	1	0	0	0	0	0	0	1	2	2	1	2	1	2	1	2	1	2	1	2	1	2	1	3	1	2	1
1398	1	9	0	1	0	40.3385	39.4379	57.8478	38.3333	0	0	0	1	0	0	1	0	1	1	1	1	1	1	1	1	1	0	1	0	4	4	4	1	0	0	4	0	4	0
1399	1	9	0	0	1	74.1846	45.355	49.1522	40.2713	1	0	0	1	0	0	1	0	1	1	0	2	1	1	2	3	1	1	2	3	0	2	1	2	1	2	1	2	1	3
1400	1	9	0	0	0	46.4923	33.5207	42.6304	59.6512	1	0	0	1	0	1	1	1	1	1	2	1	1	2	2	2	2	0	1	2	1	3	2	0	4	1	0	1	4	0
1401	1	10	0	0	0	36.7491	19.6389	52.0607	48.209	0	0	0	0	0	1	1	1	1	1	3	2	1	2	0	1	3	2	0	0	0	2	3	2	2	1	1	1	4	1
1402	1	10	0	0	1	72.0848	36.3056	52.0607	41.8124	0	0	0	0	0	1	1	0	1	1	2	1	1	1	2	1	2	2	2	2	2	2	3	2	1	2	2	0	1	0
1403	1	10	0	1	0	54.417	30.75	60.7375	39.6802	0	0	0	0	0	0	0	1	0	1	2	2	1	2	2	2	2	1	1	2	3	2	1	3	1	1	1	0	2	1
1405	1	11	0	0	0	40.5208	35.2508	57.5778	51.2594	0	0	0	0	0	1	1	0	0	0	4	2	2	1	2	1	1	0	1	0	3	4	1	1	1	2	0	0	3	0
1406	1	11	0	0	1	54.4097	15.1839	64.2444	46.2217	1	0	1	1	1	1	1	0	1	1	3	1	0	4	2	2	0	0	0	1	3	4	1	2	0	0	4	2	3	1
1407	1	11	0	0	0	50.9375	41.9398	42.0222	31.1083	1	1	0	1	0	1	1	1	1	1	3	2	1	1	2	0	0	2	4	1	0	1	1	0	3	1	4	0	3	0
1408	1	12	0	0	0	36.9388	32.9664	52.9325	57.5515	1	1	0	1	0	0	1	0	0	1	3	1	2	1	2	1	1	3	1	1	1	0	1	1	4	1	0	1	3	3
1409	1	12	0	1	0	64.1497	48.2569	52.9325	42.0876	0	0	0	0	0	0	0	0	1	0	0	2	1	2	2	2	1	3	1	3	2	1	2	2	1	3	2	0	0	0
1410	1	12	0	0	1	67.551	32.9664	61.3713	42.0876	1	1	0	1	0	1	1	1	1	1	2	1	2	2	1	1	1	1	2	3	0	2	2	1	3	0	1	2	2	3
1411	1	12	0	0	1	67.551	29.9083	61.3713	52.3969	0	0	0	0	0	0	1	1	1	1	1	1	0	2	2	1	0	4	1	3	2	1	0	2	3	3	1	1	0	3
1412	1	12	0	0	0	64.1497	39.0826	59.2616	52.3969	0	1	0	0	0	1	1	0	0	1	1	1	2	1	2	2	3	1	2	1	1	2	1	2	1	3	2	0	2	0
1414	1	13	0	0	1	56.9254	46.3462	53.6832	53.3105	1	0	0	1	0	0	1	1	1	1	2	1	3	3	1	2	1	1	1	2	3	1	1	1	0	1	2	2	4	3
1415	1	13	0	1	1	53.9403	27.1154	51.703	53.3105	0	0	0	1	0	1	1	1	1	1	0	1	1	1	1	1	2	2	4	1	4	2	1	3	0	0	1	1	1	4
1416	1	13	0	0	0	44.9851	17.5	61.604	30.4795	0	0	0	0	0	0	0	0	0	0	2	2	1	2	2	0	1	0	2	0	2	0	4	2	1	2	3	1	2	2
1417	1	13	0	0	0	47.9701	43.141	41.802	46.4612	1	0	0	1	0	0	1	0	1	1	2	2	1	1	2	2	0	2	1	2	0	2	0	2	1	2	2	2	3	0
1418	1	14	0	0	0	36.25	35.479	54.6735	43.8562	0	0	0	1	0	0	0	0	0	0	3	0	0	1	2	0	0	1	2	1	2	1	0	0	1	4	4	4	4	4
1420	1	15	0	0	0	55.2098	55.7346	39.4269	65.4795	1	1	0	1	0	0	1	1	1	1	2	1	2	2	2	1	1	2	1	2	2	1	1	2	2	2	2	2	0	1
1421	1	15	0	0	0	69.1958	17.8199	61.166	44.9315	1	0	0	0	0	1	1	1	1	1	4	0	3	2	2	0	0	1	0	3	1	1	4	2	4	0	0	0	0	2
1422	0	7	0	0	1	46.4906	26.4898	46.4658	46.7054	1	0	0	0	0	0	1	0	0	1	0	4	3	2	2	1	1	2	3	0	0	1	0	4	3	0	1	1	2	2
1423	0	7	0	0	1	42.717	55.0612	49.2055	62.2093	1	0	0	1	0	1	0	0	0	1	2	3	1	0	0	0	2	0	2	1	0	2	2	3	1	4	2	0	4	0
1425	0	7	0	0	0	42.717	34.6531	35.5068	62.2093	0	0	0	1	0	1	0	0	0	1	2	3	1	0	0	0	2	0	2	1	0	2	2	3	1	4	2	0	4	0
1426	0	8	0	1	1	69.8492	53.7356	45.3883	57.6771	0	1	1	0	0	0	1	1	1	1	2	3	3	1	4	2	0	3	0	1	1	3	1	1	1	0	1	0	4	0
1429	0	8	0	1	0	89.9497	50.8621	76.9417	32.1813	1	0	1	1	0	1	1	1	1	1	4	2	2	2	2	2	2	2	2	2	1	1	1	1	1	1	1	1	1	1
1430	0	8	0	0	0	49.7487	42.2414	42.9612	43.5127	1	0	0	0	0	1	1	1	0	1	2	3	1	1	2	1	0	0	1	0	1	3	1	3	1	2	4	3	0	1
1431	0	9	0	0	0	70.625	50.2229	57.1778	29.6333	0	0	0	1	0	1	1	0	1	1	2	3	1	1	2	1	2	2	4	0	1	2	0	2	3	1	0	0	2	1
1432	0	9	0	0	0	65.4167	40.6688	50.5111	42.9667	0	0	0	0	0	1	1	0	1	1	0	1	1	2	2	1	0	2	1	1	1	4	2	3	2	2	1	0	4	2
1433	0	9	0	0	0	55	37.4841	61.6222	36.3	1	0	0	0	0	0	1	1	1	1	2	1	1	3	1	1	2	0	0	3	1	1	2	4	2	1	2	1	0	3
1434	0	9	0	0	0	70.625	53.4076	52.7333	49.6333	1	0	0	0	0	0	1	1	1	1	1	1	3	2	1	0	2	1	1	3	0	1	2	3	1	0	3	4	2	4
1435	0	9	0	0	0	49.7917	56.5924	59.4	56.3	1	0	0	0	0	0	1	1	1	1	1	2	3	1	1	2	3	1	3	1	2	1	1	2	1	2	1	2	1	2
1436	0	9	0	0	0	60.2083	47.0382	41.6222	52.9667	0	1	0	0	0	1	0	0	0	0	2	3	1	3	2	1	1	2	0	1	3	1	2	0	1	1	3	0	1	3
1437	0	10	0	0	1	42.6818	36.1824	42.8982	63.0657	0	0	0	0	0	1	1	0	1	1	2	1	3	2	2	2	2	2	1	2	2	2	2	1	1	1	2	1	1	0
1438	0	10	0	1	1	38.1364	66.5878	42.8982	58.1995	1	0	0	0	0	0	1	1	1	1	4	3	4	1	1	4	0	0	4	0	0	0	0	4	0	4	0	0	0	0
1439	0	11	0	0	1	47.3264	54.1481	41.1294	55.4455	1	0	0	1	0	0	1	1	0	0	3	0	2	1	2	1	1	2	0	1	4	1	2	3	2	3	2	0	0	0
1440	0	11	0	1	0	50.7986	46.7407	57.5565	41.5842	0	0	0	1	0	0	1	1	0	0	4	2	1	2	2	2	0	0	0	4	1	4	3	4	1	0	0	0	1	0
1441	0	12	0	0	1	90.186	60.4605	66.7245	40.2093	0	0	1	0	0	1	1	1	0	0	3	2	3	0	0	4	0	2	4	3	1	2	0	1	1	1	1	1	1	1
1442	0	12	0	0	0	52.9767	24.2763	47.2017	61.1395	1	0	0	0	0	0	1	0	0	1	1	3	1	1	2	2	1	2	1	2	1	3	1	3	1	1	2	2	1	2
1443	0	12	0	0	0	52.9767	34.1447	42.8633	63.4651	0	1	0	1	0	0	1	1	1	1	1	1	1	2	0	0	0	0	4	2	1	3	3	4	1	1	4	0	4	0
1444	0	12	0	0	0	48.3256	47.3026	62.3861	61.1395	0	0	0	1	0	0	1	1	0	1	1	3	2	2	2	1	1	2	0	1	2	1	2	1	2	2	1	1	3	3
1445	0	12	0	0	0	62.2791	27.5658	51.5401	30.907	1	0	0	1	0	1	1	1	1	1	3	1	3	2	2	2	0	0	0	0	1	3	3	0	4	0	0	2	3	4
1446	0	13	0	0	0	41.7606	57.8228	55.5115	52.9065	1	1	0	0	0	1	1	1	1	1	2	4	4	1	0	4	0	0	2	0	0	1	4	0	0	0	4	0	4	0
1447	0	13	0	0	0	52.3239	35.038	68.0376	38.6789	1	0	0	1	0	0	1	0	1	0	2	3	3	1	2	2	1	2	1	2	2	1	1	0	2	1	1	2	2	3
1448	0	13	0	0	0	52.3239	57.8228	61.7745	36.6463	1	1	0	0	0	0	1	1	0	0	3	3	4	3	2	1	0	2	3	2	1	1	2	0	0	0	1	2	3	0
1449	0	13	0	0	0	38.2394	50.2278	49.2484	48.8415	1	1	1	1	0	0	1	1	1	1	3	2	2	2	1	2	2	1	1	1	2	3	2	2	2	0	0	0	3	1
1450	0	13	0	0	0	48.8028	55.2911	49.2484	56.9715	1	0	0	1	0	0	1	0	1	1	4	2	3	1	2	1	0	0	4	1	1	3	0	3	1	0	2	0	3	0
1451	0	13	0	0	0	62.8873	40.1013	65.9499	36.6463	1	0	0	1	0	1	1	0	1	1	1	1	2	4	2	2	2	3	3	1	0	4	1	0	1	0	1	0	2	1
1452	0	13	0	0	0	48.8028	29.9747	42.9854	34.6138	1	1	0	1	0	1	1	1	0	1	3	2	2	1	0	1	2	2	1	0	1	1	2	3	3	1	0	1	3	2
1453	0	13	0	0	0	45.2817	35.038	63.8622	30.5488	1	0	0	1	0	1	1	1	1	1	2	1	1	1	2	2	2	0	1	2	2	2	2	0	2	2	2	0	4	2
1454	0	13	0	1	0	38.2394	37.5696	55.5115	40.7114	1	1	1	0	0	0	1	1	1	1	3	1	2	1	2	0	2	0	0	1	1	0	0	4	4	0	3	4	3	2
1455	0	14	0	0	1	37.2574	28.7558	52.4898	54.1912	1	0	0	1	0	1	1	1	1	1	3	2	1	1	2	1	2	2	2	1	2	1	2	1	0	3	2	0	2	1
1456	0	14	0	0	0	45.6962	44.8848	54.5306	56.6422	0	0	0	1	0	0	1	0	0	0	3	2	3	2	1	1	0	0	1	1	1	3	2	0	4	0	2	1	4	2
1457	0	14	0	0	0	41.4768	54.1014	58.6122	54.1912	0	0	0	1	0	0	1	0	1	0	1	0	2	3	2	2	0	0	4	1	2	1	2	4	3	0	2	0	4	0
1458	0	14	0	0	0	41.4768	42.5806	62.6939	54.1912	0	0	0	1	0	0	1	0	0	1	2	1	3	4	2	3	0	0	2	2	1	1	4	3	1	0	0	0	1	1
1459	0	14	0	0	0	37.2574	31.0599	42.2857	39.4853	0	0	0	1	0	0	1	0	0	1	3	2	2	2	2	1	0	0	4	1	2	2	1	3	1	1	2	0	3	0
1460	0	14	0	0	0	41.4768	61.0138	62.6939	63.9951	1	1	0	1	0	0	1	0	1	1	2	1	2	1	2	2	2	1	2	2	2	2	2	1	2	2	1	2	1	2
1461	0	14	0	0	0	45.6962	47.1889	38.2041	61.5441	1	0	0	1	0	0	1	1	1	1	3	2	4	4	1	4	0	1	3	2	2	1	1	0	1	1	1	0	1	0
1462	0	15	0	0	0	80.8261	32.8395	61.451	52.2034	0	0	0	0	0	0	1	1	1	1	2	2	2	1	2	1	1	2	2	0	0	1	1	1	2	2	2	1	3	3
1463	0	15	0	0	0	41.6957	45.1852	52.7098	57.046	1	0	1	1	0	1	1	1	0	1	3	4	4	2	2	0	1	2	4	1	1	1	1	1	1	0	0	0	4	0
1464	0	15	0	0	0	59.087	23.5802	63.1993	30.4116	1	1	0	1	0	1	1	1	0	1	1	1	0	2	0	0	0	0	4	2	2	1	1	0	4	0	0	0	0	0
1465	0	15	0	0	1	46.0435	32.8395	63.1993	27.9903	0	0	0	1	0	0	1	1	1	1	2	1	2	3	2	1	1	1	1	2	2	3	2	1	2	1	2	0	3	2
1466	1	7	0	0	0	45.2414	44.8537	38.9522	59.8118	1	0	0	0	0	0	1	1	0	1	1	2	1	2	1	2	1	3	1	1	2	3	3	1	1	2	3	0	1	0
1467	1	8	0	0	1	40.1003	52.9594	42.0865	62.6822	0	0	0	0	0	1	1	1	1	1	1	3	1	2	1	2	1	0	1	2	1	2	2	2	2	0	2	0	4	3
1468	1	8	0	1	1	70.2007	45.7995	75.1654	39.3586	0	0	1	1	0	0	0	1	1	1	1	2	0	3	2	1	2	3	1	3	1	0	1	2	4	0	2	0	1	2
1469	1	8	0	0	0	66.8562	41.0263	54.8092	36.4431	1	0	1	0	0	0	1	1	0	0	2	1	3	1	2	2	2	1	3	1	0	0	1	2	1	1	2	1	2	3
1470	1	8	0	0	0	46.7893	31.4797	44.631	62.6822	1	0	0	1	0	1	1	0	1	1	2	3	1	0	4	0	0	1	0	2	1	0	2	3	1	4	2	0	4	0
1471	1	8	0	0	0	40.1003	45.7995	44.631	59.7668	1	0	0	1	0	1	0	0	1	1	2	3	1	0	0	0	2	0	2	1	0	2	2	3	1	4	2	0	4	0
1473	1	8	0	0	0	40.1003	50.5728	39.542	48.105	1	0	0	1	0	0	1	1	0	1	2	3	1	2	2	1	2	2	3	3	2	1	1	2	1	2	1	0	2	0
1474	1	8	0	0	0	43.4448	50.5728	47.1756	53.9359	0	0	0	0	0	1	1	1	1	1	4	4	2	4	2	2	0	0	2	1	1	2	2	2	0	0	1	1	2	0
1476	1	9	0	0	0	71.1077	45.355	66.5435	42.2093	1	0	0	1	0	1	1	0	1	0	3	0	1	0	2	2	4	0	2	2	1	4	0	2	1	3	2	0	1	0
1477	1	9	0	0	1	61.8769	45.355	64.3696	44.1473	0	0	0	0	0	0	1	1	1	1	2	1	3	3	2	1	2	1	2	1	1	1	2	1	2	1	2	1	2	2
1478	1	9	0	0	0	68.0308	30.5621	53.5	48.0233	1	0	0	0	0	0	1	0	1	1	1	2	1	3	2	0	1	1	2	2	1	2	1	1	2	2	1	1	4	4
1479	1	10	0	0	1	72.0848	44.6389	62.9067	46.0768	0	0	0	1	0	1	1	0	0	1	3	1	0	1	2	0	2	0	2	4	1	4	1	3	2	0	3	0	2	0
1480	1	10	0	0	0	57.9505	44.6389	49.8915	43.9446	1	0	0	1	0	1	1	0	1	1	1	2	1	2	2	1	2	1	3	3	2	2	1	3	1	2	0	2	2	0
1481	1	10	0	0	0	47.3498	30.75	45.5531	48.209	0	1	0	0	0	1	0	1	0	1	3	4	2	4	2	0	1	1	0	1	0	1	4	1	0	1	2	2	0	0
1482	1	10	0	0	0	40.2827	47.4167	45.5531	29.0192	1	1	0	1	0	1	1	1	1	1	3	2	1	2	0	0	1	2	4	1	0	1	1	4	1	1	4	0	3	0
1483	1	10	0	0	1	40.2827	25.1944	36.8764	52.4733	0	0	1	0	0	1	1	1	1	1	1	2	2	2	2	2	2	0	1	2	1	2	3	1	1	3	1	1	2	2
1484	1	10	0	0	0	47.3498	44.6389	43.3839	35.4158	1	1	0	0	0	1	1	1	1	1	3	2	1	2	2	0	1	2	4	1	0	1	1	0	3	1	4	0	3	0
1485	1	10	0	0	0	47.3498	30.75	58.5683	52.4733	0	0	0	0	0	1	1	1	0	1	2	3	2	1	2	1	2	0	2	0	1	2	1	3	0	2	3	1	2	1
1486	1	11	0	0	0	47.4653	38.5953	44.2444	48.7406	1	1	0	1	0	0	1	1	1	1	1	3	2	1	2	0	0	2	0	3	2	4	2	1	4	1	1	1	2	1
1487	1	11	0	0	0	43.9931	45.2843	64.2444	43.7028	0	0	0	1	0	1	1	1	1	1	1	2	3	1	2	3	0	0	1	2	1	3	0	3	1	2	1	2	3	0
1488	1	11	0	0	0	54.4097	31.9064	66.4667	51.2594	1	0	0	1	1	1	1	0	1	1	3	2	2	3	2	1	0	1	4	1	1	2	1	1	2	1	2	1	3	0
1489	1	11	0	1	0	61.3542	15.1839	50.9111	48.7406	1	1	1	0	1	0	1	0	0	0	2	1	2	2	3	2	0	0	0	3	0	4	1	0	2	3	1	3	2	2
1490	1	11	0	0	0	37.0486	55.3177	42.0222	66.3728	0	0	0	1	0	0	1	0	1	1	2	2	1	2	2	1	1	0	3	1	3	2	1	3	2	2	1	0	3	0
1491	1	12	0	0	0	43.7415	54.3731	52.9325	60.1289	0	0	0	0	0	0	1	0	1	1	3	3	4	2	2	0	0	1	0	1	1	1	2	2	0	2	1	3	4	0
1492	1	12	0	0	0	47.1429	39.0826	42.384	42.0876	1	0	0	1	0	0	1	1	1	1	2	3	1	2	2	2	1	0	4	1	2	2	3	2	1	1	1	0	2	0
1493	1	12	0	0	1	36.9388	57.4312	36.0549	65.2835	1	1	0	1	0	0	0	0	0	1	3	1	3	1	2	2	2	2	3	1	1	2	1	1	2	1	1	0	2	0
1494	1	12	0	0	1	60.7483	14.6177	52.9325	39.5103	1	1	0	1	0	0	1	0	1	1	2	3	2	3	2	0	2	1	2	3	1	2	1	1	2	0	1	2	1	1
1495	1	12	0	0	0	50.5442	2.38532	50.8228	42.0876	0	0	0	0	0	0	1	0	1	1	1	3	3	1	1	2	0	0	4	0	2	0	2	3	0	0	1	3	4	0
1496	1	12	0	0	0	40.3401	42.1407	55.0422	49.8196	1	1	0	1	1	1	1	0	1	1	2	3	1	1	2	2	0	0	3	3	0	2	3	1	0	0	3	3	0	0
1497	1	12	0	0	0	50.5442	8.50153	61.3713	42.0876	1	1	0	1	0	0	1	1	1	1	1	3	2	1	2	0	0	2	0	3	2	4	2	1	4	1	1	1	2	1
1498	1	12	0	0	0	47.1429	45.1988	55.0422	60.1289	0	0	0	1	0	0	1	1	0	1	1	2	3	1	2	1	2	0	4	3	0	1	0	4	1	0	0	1	4	1
1499	1	13	0	0	1	44.9851	49.5513	39.8218	60.1598	0	0	0	0	0	0	1	1	1	1	4	0	2	2	2	2	2	0	1	2	2	0	1	4	3	1	2	0	3	0
1500	1	13	0	0	1	56.9254	17.5	65.5644	41.895	0	0	0	1	0	0	1	1	1	1	2	1	1	0	2	1	2	4	1	2	1	3	1	2	1	0	2	1	1	3
1501	1	13	0	1	1	44.9851	39.9359	41.802	62.4429	1	0	0	1	0	0	0	0	1	0	4	2	3	1	2	2	0	1	4	1	1	0	1	2	1	2	3	0	1	0
1502	1	13	0	0	0	53.9403	43.141	57.6436	48.7443	0	0	1	0	1	0	1	1	1	1	2	1	1	3	2	0	4	0	3	2	3	1	0	4	2	3	0	0	3	0
1504	1	14	0	0	0	71.9643	38.4731	54.6735	41.6776	1	0	0	1	0	0	1	0	1	1	3	1	0	3	2	0	0	3	0	3	2	0	1	2	3	4	1	1	2	3
1505	1	14	0	0	0	75.5357	41.4671	71	52.5708	0	0	0	0	0	0	1	1	0	0	1	2	2	2	2	0	0	1	1	3	2	4	2	0	3	1	0	1	4	3
1506	1	14	0	0	0	54.1071	38.4731	42.4286	50.3922	1	0	0	0	0	0	1	1	1	1	2	3	2	1	2	1	1	1	1	1	2	2	2	3	3	0	1	0	1	2
1507	1	14	0	0	0	75.5357	38.4731	58.7551	43.8562	1	0	0	1	0	0	1	0	1	1	0	3	3	1	2	1	2	1	2	2	2	1	2	1	2	1	3	1	2	1
1508	1	14	0	0	0	43.3929	26.497	50.5918	56.9281	0	0	0	0	0	1	1	1	1	1	1	2	1	2	1	3	1	2	3	2	2	2	1	2	3	3	0	0	1	0
1509	1	14	0	0	0	54.1071	14.521	73.0408	32.963	0	1	0	1	0	0	1	0	1	1	4	1	0	2	2	0	4	4	0	4	0	4	2	0	1	0	0	1	0	0
1510	1	14	0	0	0	46.9643	23.503	50.5918	43.8562	0	0	0	0	0	0	1	1	1	1	2	1	2	1	2	2	2	2	2	2	1	2	3	2	1	2	0	0	1	1
1511	1	15	0	0	0	48.2168	34.4076	67.0949	44.9315	1	0	0	0	0	0	0	0	1	0	4	0	1	3	2	0	1	4	0	2	0	0	4	0	4	0	0	3	1	4
1512	1	15	0	0	0	79.6853	50.9953	41.4032	42.6484	0	0	1	0	0	0	1	1	0	1	2	1	1	2	2	1	1	3	0	2	3	2	1	3	1	1	3	2	1	1
1513	1	15	0	0	1	62.2028	48.6256	53.2609	49.4977	1	1	0	1	0	0	1	0	1	1	0	4	1	1	2	3	0	3	4	1	0	1	0	1	4	2	0	0	3	0
1514	1	15	0	0	0	44.7203	20.1896	67.0949	49.4977	1	0	0	0	0	0	1	0	0	1	2	1	1	2	3	1	1	1	1	2	1	1	1	1	3	3	3	2	2	2
1517	1	15	0	0	0	41.2238	50.9953	43.3794	63.1963	1	0	0	1	0	0	1	0	0	1	3	2	2	2	2	1	0	1	3	1	2	1	1	4	1	1	1	2	2	0
1518	0	7	0	0	0	46.4906	50.9796	49.2055	62.2093	0	0	0	1	0	1	1	1	1	1	3	2	3	2	2	2	1	1	1	1	1	2	2	3	2	0	2	0	3	0
1519	0	7	0	0	0	61.5849	26.4898	49.2055	38.9535	0	0	1	1	1	1	1	1	1	1	0	1	2	3	2	1	2	0	1	1	2	1	2	1	2	1	2	0	1	3
1520	0	8	0	0	0	49.7487	56.6092	45.3883	60.5099	1	1	0	1	0	1	1	1	1	1	2	0	1	2	2	2	2	0	1	0	0	4	2	0	4	2	0	4	4	0
1521	0	8	0	0	1	64.8241	39.3678	62.3786	35.0142	1	0	0	1	0	1	1	0	0	1	1	1	1	1	2	3	0	1	2	1	4	1	1	1	2	3	4	0	2	1
1522	0	8	0	0	1	94.9749	45.1149	50.2427	32.1813	1	0	0	1	0	0	0	0	1	1	0	2	3	4	2	1	3	0	2	1	2	3	0	1	2	1	3	0	3	1
1523	0	9	0	0	0	39.375	50.2229	43.8444	52.9667	1	1	0	0	0	0	1	0	1	1	2	4	1	2	2	0	0	1	4	3	2	4	1	0	1	1	0	2	4	0
1524	0	9	0	0	0	49.7917	56.5924	54.9556	46.3	0	0	1	0	0	0	1	0	0	1	2	1	0	4	0	3	3	2	0	1	2	4	3	1	0	1	1	1	1	3
1527	0	9	0	0	0	70.625	40.6688	48.2889	42.9667	0	0	0	0	0	0	1	1	1	1	4	2	1	0	2	0	0	0	1	3	4	3	0	0	4	0	3	0	4	2
1529	0	10	0	0	1	38.1364	39.5608	47.323	53.3333	1	0	0	1	0	0	1	0	1	1	4	3	2	1	2	1	0	0	3	1	0	2	1	3	2	0	0	1	4	2
1530	0	10	0	0	1	42.6818	26.0473	67.2345	55.7664	1	0	0	1	0	0	1	1	1	1	2	0	0	2	2	0	2	3	1	2	3	2	4	2	0	1	3	3	2	2
1531	0	11	0	0	0	75.1042	49.2099	51.3963	43.5644	1	0	0	1	0	0	1	1	0	0	3	1	1	2	2	1	2	1	0	3	2	2	1	3	2	2	2	2	1	2
1532	0	11	0	0	0	64.6875	31.9259	53.4497	45.5446	0	1	0	1	0	1	1	1	1	0	1	3	1	2	2	0	0	2	2	1	1	2	3	2	1	3	2	1	3	2
1533	0	11	0	0	0	68.1597	36.8642	57.5565	37.6238	0	0	0	1	0	0	1	0	1	1	2	1	3	2	2	1	1	0	1	1	1	0	1	2	4	2	3	4	1	0
1534	0	11	0	0	0	50.7986	44.2716	49.3429	57.4257	0	0	0	1	0	0	1	1	1	1	3	3	4	2	2	1	1	2	3	1	1	1	0	1	3	1	2	0	1	0
1535	0	11	0	0	0	54.2708	31.9259	49.3429	47.5248	1	0	0	1	0	1	1	0	1	1	1	3	2	1	2	2	2	3	1	2	0	3	0	1	2	1	0	0	4	1
1536	0	11	0	1	0	50.7986	41.8025	53.4497	41.5842	1	0	0	0	0	1	1	1	1	1	4	2	3	1	1	2	0	3	2	1	1	3	1	0	0	0	2	2	4	2
1537	0	12	0	0	1	85.5349	47.3026	53.7093	49.5116	0	0	0	0	0	1	1	1	1	1	1	1	1	2	1	0	0	0	4	2	1	3	3	4	1	1	4	0	4	0
1538	0	12	0	0	0	52.9767	47.3026	49.3709	58.814	1	1	1	1	0	1	1	0	1	1	2	3	2	1	2	3	1	3	1	2	1	2	0	1	1	1	1	0	4	1
1540	0	12	0	0	0	43.6744	40.7237	58.0477	47.186	0	0	0	1	1	0	1	1	1	0	3	2	1	2	2	0	2	1	3	2	1	3	2	1	2	1	1	1	1	2
1543	0	13	0	0	1	59.3662	32.5063	59.6868	48.8415	0	0	0	0	0	1	0	1	0	1	1	1	2	2	2	1	3	4	2	1	1	2	2	1	1	2	1	1	1	2
1544	0	13	0	0	0	62.8873	37.5696	68.0376	34.6138	1	0	0	1	0	0	1	1	1	1	2	1	2	3	1	2	2	1	3	1	2	1	2	2	2	1	1	2	3	2
1545	0	13	0	0	0	48.8028	42.6329	47.1608	40.7114	1	0	0	1	0	0	1	0	1	1	2	1	3	1	0	1	2	0	3	2	1	3	3	3	1	2	3	0	1	0
1546	0	14	0	0	1	45.6962	40.2765	48.4082	41.9363	1	0	1	1	1	1	1	0	1	1	0	3	3	1	2	4	0	1	4	2	2	1	4	0	0	0	3	0	3	0
1547	0	14	0	0	1	62.5738	44.8848	58.6122	29.6814	1	1	0	1	0	1	1	0	0	1	2	3	1	3	2	1	1	2	1	0	0	2	2	2	3	2	1	1	2	2
1548	0	14	0	0	0	58.3544	58.7097	60.6531	41.9363	0	0	0	1	0	1	1	1	1	0	1	1	3	3	2	0	1	0	4	0	2	4	1	0	1	3	2	0	4	1
1549	0	14	0	1	1	49.9156	49.4931	66.7755	39.4853	1	0	0	1	1	1	1	1	1	1	1	2	2	2	2	0	2	0	0	2	0	1	1	4	3	0	3	0	4	3
1550	0	15	0	0	0	63.4348	45.1852	56.2063	44.9395	0	0	0	1	0	0	1	1	1	1	2	2	3	1	2	2	0	1	2	2	1	3	4	0	2	0	0	2	3	0
1551	1	7	0	0	0	59.0345	47.2927	68.5649	19.4892	1	0	0	1	0	0	1	1	1	1	1	4	2	1	2	1	0	2	2	1	1	2	2	1	1	1	2	1	4	2
1553	1	8	0	0	0	40.1003	43.4129	42.0865	56.8513	1	0	0	1	0	1	1	0	1	1	2	3	1	0	0	0	2	0	2	1	0	2	2	3	4	2	2	0	4	0
1554	1	8	0	0	0	56.8227	36.253	49.7201	53.9359	0	0	0	1	0	1	1	1	1	1	3	1	2	2	2	2	1	0	2	2	0	2	2	1	3	2	1	0	4	0
1555	1	9	0	0	0	58.8	42.3964	53.5	55.7752	1	0	0	0	0	1	1	0	1	1	0	1	2	3	0	2	2	2	3	1	2	2	3	3	1	1	0	0	3	3
1558	1	10	0	1	1	68.5512	33.5278	60.7375	41.8124	0	1	1	1	0	0	0	1	1	1	0	4	0	0	2	0	0	2	2	3	1	4	4	2	3	2	1	1	0	1
1559	1	10	0	0	0	65.0177	50.1944	49.8915	58.8699	0	0	0	0	0	0	1	1	1	1	0	1	2	1	2	1	3	1	4	1	2	1	2	0	4	4	0	0	1	2
1560	1	11	0	0	0	47.4653	18.5284	48.6889	43.7028	0	0	0	0	0	0	0	0	0	0	2	2	0	1	2	2	2	0	3	4	3	2	1	0	1	3	4	1	0	1
1561	1	11	0	0	1	61.3542	35.2508	57.5778	41.1839	1	1	1	0	0	1	0	1	0	0	2	2	2	2	2	0	0	1	2	2	1	2	2	3	0	2	3	1	2	3
1562	1	12	0	0	0	47.1429	23.792	44.4937	52.3969	0	0	0	1	0	0	1	1	1	0	1	1	2	2	2	2	2	1	4	2	2	2	2	1	1	2	1	2	2	1
1563	1	12	0	0	0	43.7415	32.9664	40.2743	42.0876	0	0	0	1	0	1	1	1	1	1	1	3	3	1	2	2	0	0	4	0	2	0	2	3	0	0	1	3	4	0
1565	1	12	0	0	1	33.5374	32.9664	55.0422	65.2835	1	1	1	1	0	0	1	1	1	0	2	2	1	1	3	2	0	2	4	2	0	4	2	1	1	0	0	0	4	0
1567	1	12	0	0	0	43.7415	36.0245	52.9325	54.9742	1	1	0	0	0	0	1	1	1	1	3	4	2	1	2	0	2	0	3	3	0	2	0	1	2	2	0	3	1	3
1569	1	12	0	0	1	60.7483	32.9664	57.1519	36.933	1	1	0	1	0	0	1	1	1	0	1	1	2	1	2	1	3	2	0	1	2	0	4	3	1	1	2	2	2	3
1570	1	12	0	1	0	36.9388	48.2569	48.7131	39.5103	1	1	0	1	0	0	1	1	1	1	3	4	3	3	2	3	1	0	1	1	2	0	3	1	0	2	2	0	1	0
1571	1	13	0	0	0	36.0299	46.3462	45.7624	41.895	1	0	0	0	0	0	1	0	0	1	3	2	1	1	2	1	1	1	2	2	2	2	1	1	2	2	2	2	3	1
1572	1	13	0	0	0	47.9701	39.9359	57.6436	60.1598	1	1	1	1	0	1	1	0	0	1	4	2	2	2	2	1	2	1	3	2	2	2	1	1	2	2	1	0	2	0
1573	1	13	0	0	0	65.8806	43.141	73.4851	51.0274	1	1	0	0	0	1	1	1	1	0	4	3	3	2	1	2	3	3	1	1	1	1	1	0	0	2	0	3	2	2
1574	1	13	0	0	0	53.9403	11.0897	61.604	44.1781	1	1	0	1	0	1	1	1	1	1	2	1	2	2	2	1	0	1	3	2	0	1	4	3	1	1	1	1	2	3
1577	1	14	0	0	1	54.1071	38.4731	58.7551	48.2135	1	0	0	1	0	1	1	1	1	1	2	3	4	1	2	1	1	1	3	1	3	1	1	1	3	1	1	0	1	1
1579	1	14	0	0	1	39.8214	35.479	46.5102	59.1068	1	0	0	1	0	0	1	1	1	1	4	2	3	2	2	2	1	0	1	1	1	3	2	1	3	1	0	0	4	0
1580	1	14	0	0	0	64.8214	50.4491	71	37.3203	1	1	1	1	0	1	1	0	1	1	3	3	2	2	2	1	1	1	1	1	1	2	3	1	4	1	0	0	1	2
1581	1	15	0	1	0	44.7203	55.7346	47.332	58.6301	1	1	0	1	0	0	1	0	0	1	2	3	4	2	2	1	2	1	2	1	2	2	2	1	2	0	1	0	3	0
1582	1	15	0	0	1	55.2098	39.1469	61.166	42.6484	0	0	0	1	0	0	1	0	1	1	3	1	2	1	2	3	2	3	0	1	1	4	3	0	4	0	0	0	2	0
1584	1	15	0	0	0	44.7203	50.9953	55.2372	58.6301	1	1	0	1	0	0	1	0	1	1	2	2	2	1	2	3	0	1	2	1	1	1	3	1	3	2	1	0	2	2
1585	1	15	0	0	1	41.2238	46.2559	65.1186	47.2146	0	0	0	1	0	0	1	0	1	1	1	2	1	2	1	0	2	2	3	1	1	1	2	1	3	2	3	2	3	2
1586	1	15	0	0	1	37.7273	46.2559	65.1186	42.6484	1	0	0	1	0	1	1	1	1	1	3	2	2	3	1	1	2	1	2	2	1	1	1	2	3	1	2	1	3	0
1587	0	7	0	0	1	95.5472	67.3061	90.3014	31.2016	1	0	0	0	0	0	1	1	1	0	1	2	1	2	2	4	1	3	0	1	1	1	3	1	3	1	2	3	2	3
1588	0	8	0	1	1	44.7236	42.2414	45.3883	57.6771	1	1	1	1	1	1	1	1	1	1	3	2	1	2	2	2	1	1	1	2	2	1	2	2	2	2	2	3	2	3
1590	0	8	0	0	0	64.8241	36.4943	62.3786	35.0142	0	0	1	1	0	0	1	0	0	1	3	0	2	1	1	0	3	4	3	3	2	1	4	0	0	1	0	2	4	0
1591	0	8	0	1	0	44.7236	39.3678	40.534	60.5099	0	0	0	1	0	1	0	0	1	1	2	3	1	0	2	0	2	0	2	1	0	2	2	3	1	4	2	0	4	0
1592	0	8	0	0	1	59.799	42.2414	62.3786	35.0142	0	0	0	1	0	1	1	0	1	0	1	0	1	2	2	2	1	1	2	2	1	3	1	2	3	4	3	1	2	0
1593	0	9	0	0	1	65.4167	50.2229	50.5111	46.3	0	0	0	0	0	0	1	0	0	1	0	2	2	1	2	1	1	2	0	4	1	3	2	2	1	3	1	2	3	0
1594	0	9	0	0	1	91.4583	31.1146	57.1778	36.3	1	0	0	1	0	0	0	1	1	1	2	1	0	1	2	4	3	3	0	1	4	1	0	2	1	0	3	0	1	4
1595	0	9	0	0	0	60.2083	59.7771	52.7333	42.9667	0	0	0	0	0	0	1	0	0	1	1	2	2	1	2	2	0	2	2	1	2	3	3	3	2	1	1	1	2	1
1596	0	9	0	1	1	81.0417	47.0382	54.9556	19.6333	1	0	0	1	0	0	1	0	1	1	1	1	1	1	2	0	2	4	2	2	0	1	1	2	1	1	4	2	3	3
1597	0	9	0	0	0	60.2083	34.2994	54.9556	22.9667	1	1	0	0	0	1	0	0	0	0	1	2	1	1	2	1	3	2	1	2	2	0	2	0	3	4	2	1	0	4
1599	0	10	0	0	0	51.7727	59.8311	62.8097	60.6326	1	1	0	0	0	1	1	1	1	1	1	2	3	2	1	2	1	1	3	3	1	2	1	3	1	1	1	2	3	2
1601	0	10	0	0	0	69.9545	36.1824	53.9602	43.601	1	1	0	0	0	0	1	0	0	1	1	2	3	0	2	2	1	0	4	1	3	2	3	2	3	0	0	0	1	2
1602	0	11	0	0	0	43.8542	46.7407	41.1294	61.3861	0	0	0	1	0	1	0	0	1	1	1	2	1	4	4	1	1	2	1	2	2	3	1	2	2	0	3	1	1	0
1604	0	12	0	0	0	39.0233	27.5658	36.3557	58.814	1	0	0	1	0	0	1	0	1	1	3	1	3	1	2	1	2	1	2	3	3	3	1	2	0	1	2	3	0	3
1605	0	12	0	0	1	62.2791	57.1711	55.8785	35.5581	0	0	1	0	0	1	0	1	1	1	2	1	2	1	2	2	0	1	2	1	2	1	0	3	4	2	4	0	3	0
1606	0	12	0	0	0	43.6744	34.1447	58.0477	61.1395	0	0	0	1	0	0	1	1	1	1	1	2	3	1	2	2	1	0	3	4	1	3	2	1	3	0	0	0	4	0
1607	0	13	0	0	0	52.3239	40.1013	59.6868	52.9065	1	1	1	1	0	1	0	0	1	1	1	1	1	1	2	2	3	3	2	2	2	3	1	1	3	3	1	1	1	1
1608	0	13	0	0	0	62.8873	55.2911	61.7745	48.8415	0	1	1	1	0	1	1	0	1	1	4	2	2	3	1	0	2	1	0	2	0	1	4	2	1	0	2	2	4	3
1610	0	13	0	0	1	55.8451	57.8228	40.8977	50.874	0	1	1	0	0	0	0	0	0	1	2	1	2	0	2	1	3	1	2	4	1	3	1	2	0	2	1	1	3	0
1611	0	13	0	0	0	62.8873	55.2911	61.7745	36.6463	1	0	0	0	1	0	1	0	1	1	4	3	0	2	2	0	0	0	2	0	0	4	2	2	4	0	0	4	4	4
1612	0	13	0	0	1	52.3239	52.7595	57.5992	42.7439	1	0	0	1	0	0	1	1	1	0	3	1	1	2	2	2	2	2	1	2	1	1	2	2	2	1	2	1	4	0
1613	0	13	0	0	0	55.8451	45.1646	68.0376	32.5813	1	1	1	1	0	1	1	0	1	1	2	3	1	2	2	1	1	4	2	4	1	0	0	2	2	2	0	3	0	2
1615	0	14	0	0	1	37.2574	47.1889	60.6531	34.5833	1	0	0	1	0	0	1	1	1	1	3	3	4	1	2	2	1	0	1	2	1	3	2	0	1	0	3	0	4	0
1617	0	14	0	0	0	33.038	51.7972	72.898	51.7402	0	0	0	0	0	0	1	0	1	1	4	2	1	1	2	0	1	2	1	1	3	2	2	2	2	2	2	1	2	1
1618	0	14	0	0	1	45.6962	37.9724	36.1633	59.0931	1	0	0	1	0	1	1	0	1	1	3	3	1	1	2	2	0	1	2	3	1	2	2	2	1	1	1	2	3	1
1619	0	14	0	0	0	45.6962	44.8848	54.5306	46.8382	1	0	0	1	0	0	0	0	1	1	2	3	3	2	2	1	1	1	2	2	1	3	1	0	3	1	1	2	3	1
1621	0	15	0	0	1	50.3913	39.0123	61.451	52.2034	1	0	0	1	0	0	1	0	1	1	3	2	2	2	2	1	4	0	0	2	2	2	3	0	2	0	2	2	4	2
1622	0	15	0	0	0	37.3478	35.9259	64.9476	49.7821	1	0	0	0	0	0	1	1	1	0	3	2	3	1	2	1	0	2	4	2	0	2	1	0	3	0	2	2	2	2
1623	0	15	0	0	1	59.087	29.7531	63.1993	37.6755	0	0	0	0	0	0	1	1	1	1	2	1	2	3	2	1	2	1	2	2	3	2	2	2	3	1	0	2	1	1
1624	0	15	0	0	1	50.3913	39.0123	45.7168	49.7821	1	0	0	1	0	0	1	1	0	1	2	2	1	1	2	0	2	2	1	2	1	3	1	2	1	1	2	0	4	3
1625	0	15	0	0	0	50.3913	48.2716	54.458	57.046	0	0	0	1	0	1	0	0	0	1	2	1	1	2	1	1	1	2	4	2	2	2	3	4	2	1	1	1	1	1
1626	1	7	0	0	0	38.3448	52.1707	38.9522	65.1882	1	0	0	1	0	1	1	0	1	1	2	3	1	0	2	0	2	0	2	1	0	2	2	3	1	4	2	0	4	0
1627	1	7	0	0	0	38.3448	49.7317	41.2301	65.1882	1	0	0	1	0	1	0	1	0	1	2	3	1	0	2	0	2	0	2	1	0	2	2	3	1	4	2	0	4	0
1628	1	7	0	0	0	55.5862	52.1707	45.7859	30.2419	1	0	0	1	0	0	1	0	1	1	3	3	2	1	2	1	0	2	2	0	4	1	0	0	4	0	4	0	3	0
1629	1	8	0	0	0	33.4114	48.1862	49.7201	33.5277	0	0	0	0	0	0	1	1	1	1	3	2	3	1	0	2	2	1	2	2	1	1	2	2	1	3	1	3	0	0
1632	1	8	0	0	1	70.2007	50.5728	47.1756	42.2741	0	0	0	0	0	0	1	0	1	1	3	1	2	4	2	2	0	1	2	2	1	4	1	0	1	2	1	2	2	3
1633	1	8	0	0	1	53.4783	41.0263	70.0763	45.1895	1	0	0	1	0	0	1	1	1	1	2	2	2	1	2	0	1	0	1	4	4	3	3	1	0	1	3	4	2	0
1635	1	9	0	0	1	43.4154	33.5207	44.8043	53.8372	0	0	0	1	0	1	1	1	1	1	4	0	0	2	2	1	2	2	0	1	1	3	2	0	2	3	1	4	4	2
1636	1	9	0	0	1	71.1077	42.3964	49.1522	49.9612	1	0	0	0	0	0	1	0	1	1	3	2	0	2	2	1	1	2	1	1	2	3	2	1	2	4	2	0	3	0
1637	1	9	0	0	0	46.4923	42.3964	68.7174	51.8992	1	0	0	1	0	0	1	1	1	1	1	4	1	4	2	1	3	1	2	1	1	1	3	1	3	0	2	0	1	1
1638	1	9	0	0	0	77.2615	42.3964	68.7174	51.8992	1	0	1	0	1	0	1	1	0	1	2	1	1	1	2	1	2	2	2	1	3	2	1	1	3	2	2	2	2	2
1639	1	9	0	0	0	46.4923	51.2722	42.6304	59.6512	0	0	0	1	0	1	1	0	1	1	3	2	1	2	1	1	2	2	4	1	2	0	3	3	2	1	1	0	1	1
1640	1	9	0	0	0	68.0308	45.355	51.3261	48.0233	0	0	0	1	0	0	1	1	1	1	1	0	2	0	2	1	3	3	4	3	1	2	1	3	1	0	2	1	2	0
1641	1	10	0	0	1	61.4841	36.3056	54.2299	41.8124	1	1	0	0	0	0	1	0	0	1	1	2	2	1	2	2	2	2	2	3	2	0	2	2	3	1	2	0	3	0
1642	1	10	0	0	0	43.8163	50.1944	54.2299	48.209	1	1	1	1	1	1	1	1	1	1	1	3	1	1	2	2	0	1	2	1	0	2	1	2	4	2	4	0	1	2
1643	1	10	0	0	0	57.9505	39.0833	43.3839	33.2836	1	1	0	0	0	1	1	1	1	1	3	2	1	2	2	0	0	2	4	2	0	2	2	0	2	2	4	0	3	0
1644	1	11	0	0	0	47.4653	31.9064	64.2444	53.7783	1	0	0	0	0	0	1	1	1	1	1	0	2	1	2	4	2	0	2	2	1	3	1	3	1	2	1	1	4	0
1645	1	11	0	0	0	54.4097	51.9732	55.3556	46.2217	0	0	0	1	0	0	1	1	1	1	3	3	2	0	2	3	1	1	1	1	3	3	3	2	1	0	0	0	1	2
1647	1	11	0	0	1	57.8819	48.6288	59.8	43.7028	1	0	0	0	0	0	0	0	0	0	2	4	2	1	2	1	1	0	4	0	1	1	3	2	1	1	2	0	3	1
1648	1	12	0	0	0	40.3401	36.0245	65.5907	44.6649	1	0	0	1	0	0	1	0	1	1	4	3	2	0	2	1	0	0	1	0	0	3	1	3	3	2	1	2	3	2
1649	1	13	0	0	1	47.9701	23.9103	69.5248	46.4612	1	0	0	1	0	0	1	1	0	1	1	2	1	2	2	3	3	2	3	2	1	2	2	1	1	1	2	1	2	1
1650	1	13	0	0	1	56.9254	20.7051	69.5248	23.6301	1	1	0	1	0	0	1	0	1	1	4	1	2	3	2	1	1	3	1	3	3	1	3	1	3	1	0	0	2	1
1652	1	13	0	1	0	68.8657	30.3205	57.6436	44.1781	1	0	0	0	0	1	1	1	1	1	1	1	1	1	2	2	3	1	4	0	1	2	1	3	1	3	1	3	1	3
1653	1	14	0	0	0	46.9643	44.4611	66.9184	46.0349	0	0	0	1	0	1	1	1	0	1	3	2	3	3	2	2	2	2	1	3	2	0	0	1	3	1	1	2	3	2
1654	1	14	0	0	0	43.3929	41.4671	60.7959	59.1068	1	0	0	0	0	0	1	0	0	1	4	3	2	2	2	1	0	2	3	2	2	1	2	3	3	0	1	0	2	0
1655	1	14	0	0	0	50.5357	50.4491	64.8776	46.0349	1	1	0	0	0	1	1	1	0	1	3	3	3	2	2	1	1	2	1	0	1	1	4	2	1	0	3	0	2	1
1656	1	14	0	1	1	57.6786	47.4551	64.8776	37.3203	1	1	1	1	0	0	0	0	0	1	1	1	1	2	2	0	1	2	3	2	4	0	1	3	3	2	2	1	4	1
1657	1	15	0	0	0	58.7063	29.6682	53.2609	40.3653	0	1	0	1	0	0	1	0	1	1	3	2	4	2	2	1	2	2	2	2	1	1	1	2	1	1	1	2	2	1
1658	1	15	0	0	0	62.2028	39.1469	55.2372	47.2146	1	0	0	1	0	0	1	0	1	1	3	1	0	1	0	1	2	1	2	0	1	3	4	2	4	1	3	1	2	0
1660	1	15	0	0	1	44.7203	62.8436	43.3794	49.4977	0	1	0	1	0	1	1	0	1	1	2	2	3	2	2	1	0	0	4	0	4	0	1	1	1	4	2	0	4	0
1661	1	15	0	0	0	72.6923	50.9953	73.0237	24.3836	0	0	0	0	0	0	1	0	1	1	3	2	1	3	0	1	2	3	1	2	1	1	3	2	4	1	0	2	1	1
1662	0	7	0	0	1	57.8113	6.08163	43.726	31.2016	0	0	0	0	0	0	1	1	0	1	0	1	2	1	2	4	2	1	3	2	1	2	1	2	0	2	1	1	3	4
1663	0	7	0	0	0	69.1321	50.9796	65.6438	27.3256	0	1	1	0	0	0	1	1	1	1	1	3	1	3	2	1	2	3	1	2	0	2	3	1	2	1	3	1	2	1
1664	0	7	0	0	0	42.717	38.7347	51.9452	62.2093	1	0	0	1	0	1	1	0	1	1	2	3	1	0	2	0	2	0	2	1	0	2	4	1	2	4	2	0	4	0
1665	0	7	0	0	0	54.0377	50.9796	51.9452	7.94574	1	0	0	0	0	1	1	1	0	1	3	2	1	2	0	0	1	2	4	1	4	4	1	0	1	1	4	1	3	0
1666	0	8	0	0	0	44.7236	39.3678	50.2427	57.6771	1	0	0	0	0	0	1	0	1	1	2	1	1	1	2	1	2	2	2	3	2	2	3	0	2	2	2	0	3	2
1668	0	8	0	0	0	59.799	42.2414	47.8155	52.0113	1	0	0	1	0	1	1	1	1	1	2	2	2	2	2	1	1	2	2	3	4	3	2	1	2	1	1	2	2	2
1669	0	9	0	0	0	81.0417	31.1146	57.1778	26.3	1	0	0	0	0	1	1	1	1	1	1	2	4	0	2	2	0	1	3	0	1	2	2	4	0	1	3	3	0	4
1670	0	9	0	0	1	49.7917	43.8535	50.5111	49.6333	1	0	0	1	0	1	0	0	1	1	2	0	1	2	3	3	2	1	2	2	1	4	1	4	0	3	2	0	2	0
1671	0	9	0	0	1	65.4167	43.8535	54.9556	39.6333	0	0	0	1	0	1	1	0	1	1	1	1	1	2	2	3	1	3	1	4	2	0	2	3	2	1	4	1	2	1
1672	0	9	0	0	1	55	53.4076	46.0667	52.9667	1	0	0	0	0	1	1	0	0	1	2	1	1	2	2	4	0	2	0	3	0	1	4	4	3	0	0	0	4	1
1673	0	9	0	0	1	70.625	50.2229	41.6222	42.9667	1	0	0	0	0	0	1	0	1	1	2	1	1	0	2	2	3	1	1	2	1	0	4	1	2	3	2	2	3	1
1674	0	10	0	0	1	79.0455	36.1824	62.8097	43.601	1	1	0	1	0	1	1	0	1	0	1	2	3	2	2	3	1	3	2	1	2	1	3	2	1	1	2	1	1	0
1675	0	10	0	1	0	65.4091	56.4527	78.2965	41.1679	1	0	0	0	0	0	0	1	0	1	1	2	4	3	2	1	2	1	2	3	1	2	3	1	1	2	1	1	1	1
1676	0	10	0	0	0	51.7727	26.0473	51.7478	58.1995	1	1	0	1	0	1	1	0	1	1	1	4	3	1	2	3	1	0	4	1	0	2	3	2	1	0	0	0	4	1
1677	0	10	0	0	1	56.3182	49.6959	51.7478	60.6326	1	0	0	1	0	1	1	0	1	1	1	1	1	2	2	3	1	3	1	4	2	0	2	3	2	1	4	1	2	1
1678	0	10	0	0	1	56.3182	46.3176	58.385	36.3017	1	0	0	0	0	1	1	1	1	1	4	3	1	2	2	1	0	1	3	1	1	3	2	3	1	2	3	0	2	0
1680	0	10	0	0	0	60.8636	46.3176	73.8717	46.0341	1	0	0	1	0	0	1	1	1	1	3	2	1	2	2	1	2	1	2	1	2	3	2	2	1	2	1	1	3	2
1681	0	11	0	0	0	71.6319	39.3333	51.3963	43.5644	0	1	0	1	0	0	0	0	0	0	1	3	2	1	2	3	2	1	2	1	0	2	0	2	1	2	2	2	3	3
1682	0	11	0	0	1	40.3819	34.3951	51.3963	55.4455	1	0	1	1	0	1	1	1	1	1	1	3	2	4	2	0	1	2	3	1	0	0	1	2	1	3	3	3	4	3
1683	0	12	0	0	0	48.3256	57.1711	58.0477	56.4884	1	1	1	1	0	1	1	0	1	1	3	1	2	0	2	3	1	2	1	1	3	2	1	2	1	3	2	1	2	1
1684	0	12	0	0	0	52.9767	47.3026	49.3709	33.2326	0	1	1	1	0	0	1	1	1	1	0	3	1	3	2	1	3	3	3	2	3	1	0	4	2	1	0	2	2	0
1685	0	12	0	0	0	57.6279	44.0132	51.5401	56.4884	0	0	0	0	0	0	0	0	0	0	0	1	2	2	2	1	0	1	3	0	2	2	2	4	3	4	2	1	1	0
1687	0	12	0	0	1	85.5349	53.8816	55.8785	49.5116	1	1	0	1	0	1	1	1	0	1	3	3	2	1	1	1	1	4	0	1	3	1	3	1	0	2	4	0	3	0
1688	0	12	0	0	0	52.9767	44.0132	62.3861	54.1628	0	0	0	0	0	0	1	1	1	1	1	1	2	1	2	2	1	2	4	3	3	1	1	2	2	2	1	0	3	2
1689	0	13	0	0	0	48.8028	22.3797	42.9854	48.8415	0	0	0	1	0	0	1	1	0	1	1	2	2	2	2	1	2	2	1	2	2	2	1	1	3	2	3	1	3	2
1690	0	13	0	0	1	59.3662	40.1013	55.5115	34.6138	0	0	0	0	0	0	1	1	1	1	3	4	3	4	2	0	1	1	2	1	4	2	2	1	2	1	0	0	4	0
1691	0	13	0	0	1	62.8873	37.5696	70.1253	40.7114	1	0	1	1	0	1	0	1	1	0	2	1	1	3	2	0	3	2	1	2	1	2	1	1	4	2	1	2	1	4
1692	0	13	0	0	0	45.2817	35.038	59.6868	54.939	1	1	1	1	0	1	1	0	1	1	2	1	2	1	2	1	2	2	3	1	2	2	1	3	2	0	1	1	4	2
1693	0	14	0	0	1	49.9156	44.8848	50.449	44.3873	1	1	0	1	0	0	0	0	1	1	2	1	3	2	2	2	1	1	1	1	2	3	4	1	1	1	2	0	1	3
1694	0	14	0	0	0	62.5738	54.1014	66.7755	41.9363	1	1	0	1	0	0	0	0	1	1	2	2	2	3	2	2	1	1	2	2	2	2	3	3	2	1	0	2	1	2
1695	0	14	0	0	1	49.9156	42.5806	54.5306	59.0931	1	0	0	0	0	0	1	0	1	1	0	3	2	1	1	2	3	1	4	3	1	1	2	1	1	1	1	1	4	2
1696	0	14	0	0	1	58.3544	42.5806	62.6939	41.9363	1	1	1	1	0	1	1	0	1	1	0	2	2	1	2	1	0	1	3	2	1	1	2	3	4	2	2	2	3	0
1697	0	15	0	0	0	54.7391	5.06173	68.4441	27.9903	1	0	0	1	0	0	1	1	1	1	2	0	0	4	0	0	4	4	0	2	0	1	4	2	4	0	1	4	3	4
1698	1	7	0	0	1	45.2414	37.5366	41.2301	40.9946	1	0	0	0	1	1	1	1	1	1	1	2	4	3	2	2	2	2	0	0	0	2	2	2	2	2	2	2	2	2
1699	1	7	0	0	0	65.931	44.8537	57.1754	43.6828	1	0	0	1	0	0	1	1	0	1	1	2	3	2	2	1	1	3	3	1	1	2	3	1	3	1	1	2	1	2
1700	1	7	0	0	1	69.3793	37.5366	59.4533	35.6183	0	0	0	1	0	1	1	1	1	1	1	2	3	1	2	3	1	0	2	0	4	1	3	0	2	1	2	1	2	3
1701	1	8	0	0	1	63.5117	43.4129	62.4427	45.1895	0	0	0	0	0	0	1	0	1	1	3	2	4	1	2	1	2	0	4	2	1	2	0	2	3	2	0	1	1	2
1702	1	8	0	0	1	56.8227	50.5728	59.8982	45.1895	0	0	0	0	0	0	0	0	1	1	1	2	2	1	2	1	2	0	1	0	4	1	1	1	1	1	4	4	4	0
1703	1	8	0	0	0	76.8896	45.7995	75.1654	39.3586	1	0	0	1	0	1	1	0	0	1	2	0	0	1	2	1	2	3	1	2	1	2	4	1	2	3	4	1	2	1
1704	1	8	0	0	0	46.7893	55.3461	54.8092	56.8513	1	1	1	0	0	1	1	1	1	1	2	1	2	2	2	2	2	3	2	2	3	2	2	0	1	2	1	1	4	0
1705	1	9	0	0	0	52.6462	21.6864	49.1522	40.2713	1	0	0	1	0	0	1	1	1	1	3	1	1	2	2	1	2	1	2	1	4	1	2	1	2	1	1	3	4	1
1706	1	9	0	1	0	49.5692	45.355	44.8043	57.7132	0	0	1	0	1	1	1	0	0	1	2	1	3	4	4	0	2	2	1	1	2	1	2	1	2	1	2	0	0	2
1708	1	9	0	0	1	40.3385	39.4379	49.1522	55.7752	0	0	0	1	0	0	1	1	0	1	4	1	4	2	2	3	3	0	3	2	3	0	2	1	2	0	2	0	1	0
1709	1	9	0	1	0	52.6462	54.2308	51.3261	55.7752	1	0	0	0	0	0	1	1	1	1	1	1	2	1	2	1	0	2	2	3	1	2	1	2	1	4	1	1	4	3
1710	1	10	0	0	0	65.0177	36.3056	54.2299	56.7377	1	0	1	0	0	1	1	1	1	1	4	1	1	1	2	2	3	4	2	2	3	2	1	0	1	1	1	2	2	2
1711	1	10	0	0	0	57.9505	41.8611	49.8915	35.4158	1	1	0	1	0	1	1	1	1	1	3	2	1	2	0	0	1	2	4	1	4	4	1	0	1	1	4	1	3	0
1712	1	10	0	0	1	57.9505	27.9722	56.3991	46.0768	1	0	0	1	0	0	1	0	1	1	0	0	1	4	2	1	3	3	2	3	0	4	0	1	3	1	1	3	2	3
1713	1	10	0	0	1	68.5512	41.8611	62.9067	50.3412	0	0	0	1	0	1	0	1	0	1	2	2	2	2	2	2	2	2	2	2	2	2	2	2	2	2	2	0	2	0
1714	1	11	0	1	1	75.2431	45.2843	73.1333	43.7028	1	0	0	0	0	0	1	1	1	1	0	2	4	3	0	1	0	0	1	3	2	4	4	2	3	0	1	3	4	1
1715	1	11	0	0	1	61.3542	45.2843	59.8	53.7783	0	0	0	1	0	1	1	0	1	1	3	1	2	4	2	2	0	0	2	1	2	1	4	3	4	2	0	0	4	0
1716	1	11	0	0	0	54.4097	25.2174	59.8	56.2972	0	0	1	1	0	0	1	0	0	1	3	3	2	2	2	1	1	0	0	1	1	0	1	3	2	3	4	4	2	0
1717	1	11	0	0	1	47.4653	8.49498	64.2444	51.2594	1	0	0	0	0	0	1	0	1	1	1	2	1	1	1	2	2	3	3	1	0	4	1	1	3	2	1	1	0	3
1718	1	12	0	0	0	47.1429	45.1988	55.0422	47.2423	1	0	0	0	0	0	1	0	1	1	2	1	1	2	1	1	3	2	2	2	2	1	2	3	2	3	1	2	3	2
1719	1	12	0	0	1	60.7483	20.7339	55.0422	47.2423	1	1	0	1	1	1	1	1	1	1	2	3	1	2	2	1	3	2	1	2	1	2	1	2	3	2	1	2	1	2
1720	1	12	0	0	1	43.7415	29.9083	55.0422	36.933	1	0	0	1	0	0	0	0	1	1	1	2	3	0	2	1	2	2	3	2	1	1	2	1	2	1	2	0	2	3
1721	1	12	0	0	0	57.3469	39.0826	61.3713	52.3969	1	0	0	1	0	0	0	0	0	1	1	2	2	1	2	1	2	0	1	2	1	3	4	1	3	2	1	0	3	2
1722	1	12	0	0	0	64.1497	32.9664	57.1519	34.3557	0	0	0	1	0	0	1	1	1	1	1	2	1	1	2	2	1	1	1	4	1	2	3	4	3	2	1	0	1	1
1723	1	12	0	0	1	60.7483	32.9664	44.4937	44.6649	0	0	0	0	0	1	1	1	1	1	0	3	4	4	2	3	1	2	3	2	0	0	0	3	3	1	1	0	3	0
1724	1	12	0	1	1	81.1565	60.4893	80.3586	44.6649	1	0	0	0	1	0	1	0	0	1	2	1	4	2	2	3	4	2	1	0	1	4	0	2	0	0	2	0	4	0
1726	1	12	0	0	1	53.9456	26.8502	65.5907	44.6649	1	1	0	1	1	1	1	0	0	1	3	2	2	2	1	3	3	2	1	3	1	1	1	0	3	1	2	0	4	0
1727	1	13	0	0	0	53.9403	49.5513	53.6832	44.1781	1	0	0	1	0	0	1	0	1	1	3	1	2	1	2	1	0	1	4	1	2	2	1	0	4	2	3	0	4	0
1728	1	13	0	0	1	47.9701	49.5513	55.6634	41.895	1	0	0	1	0	0	1	1	1	0	3	2	2	1	0	2	0	0	2	1	2	4	4	2	2	2	1	1	3	0
1729	1	13	0	0	0	47.9701	23.9103	59.6238	60.1598	1	0	0	1	0	0	1	1	1	0	2	1	1	2	0	3	1	2	4	2	1	4	2	2	1	0	2	1	4	0
1730	1	13	0	0	1	68.8657	23.9103	71.505	37.3288	1	1	0	1	0	0	1	0	0	1	2	1	2	1	2	1	1	1	2	1	3	3	3	2	2	1	1	1	4	1
1733	1	13	0	0	1	80.806	49.5513	67.5446	51.0274	1	1	0	1	1	1	0	0	1	1	2	1	1	2	2	1	2	1	3	1	3	2	2	2	2	2	2	2	2	2
1735	1	14	0	0	1	68.3929	44.4611	50.5918	41.6776	1	0	1	1	0	0	1	0	0	1	2	1	3	1	2	3	1	0	4	1	1	3	1	0	4	2	0	1	4	1
1736	1	14	0	0	1	82.6786	44.4611	64.8776	52.5708	1	1	1	1	0	0	1	1	1	1	0	1	1	1	2	4	0	2	4	4	2	0	2	1	3	1	4	0	1	2
1737	1	14	0	0	1	64.8214	26.497	52.6327	37.3203	0	0	0	0	0	1	0	0	1	0	2	1	1	2	2	1	1	0	3	1	2	1	2	3	3	2	1	2	3	4
1738	1	14	0	0	1	39.8214	41.4671	52.6327	46.0349	1	0	0	0	0	0	1	0	0	1	4	3	2	1	2	2	1	1	0	2	2	1	3	1	4	2	0	2	0	3
1739	1	14	0	0	0	57.6786	50.4491	52.6327	52.5708	1	1	1	1	0	1	0	1	1	0	3	3	3	1	2	1	2	0	2	0	3	1	0	1	2	2	3	3	1	1
1740	1	14	0	0	0	82.6786	41.4671	42.4286	43.8562	0	1	0	1	0	0	0	0	1	1	1	3	1	1	2	1	2	2	1	2	2	2	2	2	1	2	3	1	2	3
1741	1	15	0	0	1	44.7203	41.5166	53.2609	51.7808	1	0	0	0	0	0	1	1	1	1	3	3	3	1	2	1	2	0	0	0	2	3	2	3	4	0	0	0	4	0
1742	0	8	0	0	1	54.7739	39.3678	55.0971	52.0113	0	0	1	1	0	1	0	0	0	1	0	1	1	2	2	1	4	3	3	1	0	3	4	4	1	1	0	0	1	2
1743	0	8	0	0	1	59.799	42.2414	64.8058	52.0113	1	0	1	1	0	1	1	0	1	1	1	2	4	0	2	1	3	2	1	2	0	4	1	3	2	1	3	0	1	0
1744	0	8	0	0	0	49.7487	39.3678	57.5243	46.3456	1	0	0	1	0	1	1	1	1	1	3	2	2	2	2	2	2	0	2	2	2	1	1	1	2	2	2	0	3	4
1745	0	8	0	0	1	74.8744	30.7471	57.5243	32.1813	0	0	0	1	0	0	1	0	1	1	1	2	0	2	2	4	3	4	1	2	0	1	1	2	0	4	0	4	0	4
1746	0	8	0	0	0	44.7236	50.8621	40.534	63.3428	1	0	0	1	0	1	1	1	1	1	3	3	3	2	2	2	2	3	2	3	3	2	1	0	2	0	1	2	1	0
1747	0	9	0	0	0	75.8333	27.9299	57.1778	29.6333	0	0	0	1	0	1	1	0	1	1	1	2	3	1	0	2	2	0	1	2	1	3	2	0	1	3	4	1	3	4
1748	0	10	0	0	1	47.2273	32.8041	53.9602	38.7348	1	0	0	0	0	1	1	1	1	1	4	4	3	1	2	1	1	0	2	0	0	0	4	1	2	3	2	2	2	2
1750	0	10	0	0	1	69.9545	53.0743	53.9602	41.1679	1	0	0	0	0	1	1	1	1	1	4	3	1	2	2	1	0	1	2	1	1	3	2	1	2	2	2	2	4	2
1751	0	10	0	0	0	60.8636	36.1824	56.1726	41.1679	1	0	0	0	0	0	1	1	0	1	1	3	1	1	2	0	1	3	1	3	4	0	2	3	1	2	3	1	2	4
1752	0	10	0	0	0	38.1364	39.5608	67.2345	55.7664	0	0	0	0	0	0	1	1	0	0	2	2	3	2	2	2	1	1	3	2	1	2	2	1	1	2	3	1	2	2
1753	0	11	0	0	1	50.7986	51.679	49.3429	53.4653	1	1	0	1	0	1	1	0	1	1	3	4	1	2	2	1	2	1	1	2	3	4	1	3	1	1	1	1	1	2
1754	0	11	0	0	1	57.7431	29.4568	45.2361	37.6238	0	1	1	0	0	0	1	0	0	0	2	2	2	2	2	2	2	2	2	2	2	3	3	2	1	2	0	2	2	2
1756	0	11	0	0	0	50.7986	34.3951	47.2895	47.5248	1	0	1	1	0	1	1	1	1	1	2	2	1	1	2	2	2	1	1	1	1	2	2	2	1	2	2	4	4	0
1758	0	11	0	0	0	61.2153	44.2716	69.8768	43.5644	1	1	0	1	0	0	1	1	0	0	2	2	3	1	1	2	2	3	1	2	2	1	1	3	2	1	3	1	2	2
1759	0	12	0	0	1	76.2326	47.3026	73.2321	37.8837	0	0	0	0	0	1	1	1	1	1	2	3	2	3	3	2	1	1	3	3	0	1	2	0	1	0	3	3	3	3
1763	0	12	0	0	1	43.6744	34.1447	51.5401	40.2093	1	1	0	0	0	0	1	1	1	1	2	3	1	2	2	0	0	2	1	2	3	2	3	2	2	2	3	0	3	2
1764	0	13	0	0	1	62.8873	50.2278	38.81	50.874	0	1	0	0	1	0	1	0	1	1	3	4	3	2	2	1	2	1	2	1	1	1	1	2	1	3	2	0	3	1
1765	0	13	0	0	1	45.2817	45.1646	63.8622	63.0691	1	0	0	1	0	1	1	1	1	1	3	3	2	2	2	1	1	1	2	1	1	3	2	1	1	3	2	2	3	2
1766	0	13	0	0	0	52.3239	37.5696	57.5992	63.0691	0	1	0	1	0	0	1	1	1	0	2	1	2	2	2	2	2	2	2	2	2	2	2	2	2	2	2	2	2	2
1768	0	14	0	0	0	49.9156	47.1889	62.6939	34.5833	1	1	0	0	0	0	1	0	0	1	2	1	3	1	2	2	2	3	2	3	2	3	2	2	1	1	2	0	0	1
1769	0	14	0	0	0	37.2574	42.5806	56.5714	54.1912	1	0	0	0	0	1	1	1	1	1	4	2	1	1	2	2	0	0	0	3	1	4	2	3	4	1	1	0	4	0
1770	0	14	0	0	1	41.4768	33.3641	58.6122	49.2892	1	0	0	0	0	0	1	1	1	1	3	4	1	2	2	1	2	1	3	1	1	3	2	2	2	1	1	1	3	1
1771	0	14	0	0	0	49.9156	37.9724	62.6939	51.7402	1	0	0	1	0	0	1	1	0	1	3	4	2	2	2	2	1	0	2	2	0	2	3	0	2	1	3	0	3	1
1772	0	14	0	0	1	49.9156	47.1889	58.6122	32.1324	0	1	1	1	0	1	1	1	1	1	4	3	2	2	2	2	0	0	2	2	1	3	3	1	1	2	2	0	4	0
1773	0	15	0	0	1	37.3478	32.8395	59.7028	52.2034	1	1	0	1	0	0	1	1	1	1	2	3	2	3	2	1	3	3	1	2	1	1	2	1	2	1	2	2	3	2
1774	0	15	0	0	0	67.7826	32.8395	47.465	44.9395	0	0	0	0	0	0	1	1	0	1	3	2	2	3	2	3	2	1	0	2	2	2	2	2	2	2	1	0	2	2
1775	0	15	0	0	0	50.3913	51.358	63.1993	59.4673	1	0	0	1	0	1	1	0	1	1	2	2	3	2	2	2	0	2	2	3	1	3	1	0	3	0	2	2	3	3
1777	1	8	0	0	1	43.4448	52.9594	44.631	62.6822	1	0	1	1	0	1	1	1	1	1	3	1	2	2	2	2	2	0	1	1	4	2	2	0	1	1	2	2	4	4
1778	1	8	0	0	1	36.7559	55.3461	36.9975	62.6822	1	0	0	1	0	1	1	1	1	1	3	1	2	2	2	2	2	0	1	3	4	4	2	0	4	0	2	0	4	0
1781	1	9	0	0	0	58.8	36.4793	57.8478	51.8992	1	0	0	1	0	0	1	1	1	1	2	3	2	2	2	1	1	2	2	1	2	2	2	3	2	2	2	0	1	1
1782	1	9	0	0	0	58.8	21.6864	46.9783	55.7752	1	1	1	0	0	1	1	0	1	1	0	1	0	3	2	1	2	3	2	4	1	2	0	3	0	2	4	0	2	4
1784	1	10	0	0	0	61.4841	36.3056	56.3991	48.209	0	0	0	0	0	0	1	0	1	1	2	3	1	1	2	4	2	2	0	4	0	1	0	4	4	0	0	0	4	0
1786	1	10	0	0	0	61.4841	36.3056	52.0607	43.9446	1	0	1	0	0	1	1	1	0	0	1	2	3	1	2	3	1	3	2	1	0	3	1	2	0	0	4	2	3	2
1787	1	10	0	0	1	75.6184	47.4167	73.7527	46.0768	0	0	0	0	0	1	1	0	1	1	1	3	2	0	2	2	3	0	2	2	2	2	2	2	2	2	2	0	3	1
1788	1	11	0	0	1	54.4097	48.6288	44.2444	66.3728	1	1	1	1	1	1	1	0	1	0	2	3	2	0	2	3	2	1	3	2	0	0	3	2	3	2	3	0	0	0
1791	1	12	0	0	0	50.5442	29.9083	42.384	60.1289	1	0	0	1	0	1	1	1	0	1	3	4	2	1	2	3	0	1	4	2	2	2	1	3	2	1	0	0	3	0
1792	1	13	0	0	0	39.0149	36.7308	65.5644	53.3105	1	1	0	0	0	1	1	0	1	1	3	2	3	2	2	1	0	0	4	0	1	0	1	3	4	2	2	0	4	1
1793	1	13	0	0	0	59.9104	27.1154	53.6832	57.8767	1	1	1	1	0	0	1	1	1	1	1	0	2	1	2	2	3	1	0	2	3	3	1	2	4	4	2	0	3	0
1794	1	13	0	0	1	44.9851	14.2949	41.802	53.3105	0	1	0	0	1	0	1	0	1	1	2	3	4	1	1	2	1	2	3	1	2	3	1	2	1	2	0	2	2	1
1795	1	13	0	0	0	71.8507	52.7564	65.5644	46.4612	1	0	0	0	0	0	1	1	0	1	2	2	2	2	2	1	2	2	2	2	2	2	2	2	2	2	2	2	2	2
1796	1	14	0	0	0	64.8214	38.4731	60.7959	43.8562	0	1	0	0	0	0	1	0	1	1	1	2	1	3	2	1	3	1	1	3	1	1	2	2	3	2	3	2	3	2
1798	1	14	0	0	1	54.1071	26.497	58.7551	41.6776	1	1	1	1	0	0	1	1	1	1	1	1	0	1	2	1	2	3	3	3	1	2	2	1	1	2	2	2	3	4
1799	1	15	0	0	0	55.2098	39.1469	45.3557	47.2146	1	0	0	0	0	0	1	0	1	1	3	2	1	2	2	1	2	2	2	1	2	2	1	2	2	2	2	2	3	1
1800	1	15	0	0	0	41.2238	43.8863	57.2134	65.4795	1	0	0	0	0	1	1	1	1	1	4	3	2	2	0	2	0	2	3	2	1	3	2	0	2	0	4	0	4	0
1801	0	7	0	0	0	50.2642	38.7347	46.4658	54.4574	0	0	0	1	0	1	0	0	1	1	2	3	1	0	2	0	2	2	2	0	2	2	3	3	0	4	2	0	4	0
1802	0	7	0	0	0	46.4906	38.7347	62.9041	54.4574	1	0	0	1	0	0	1	1	0	1	2	2	2	2	2	2	2	2	2	2	2	2	2	2	2	2	2	2	2	2
1804	0	7	0	0	1	72.9057	14.2449	62.9041	19.5736	1	0	1	1	1	0	0	1	1	1	1	1	2	1	2	2	1	1	2	3	3	3	2	3	1	3	2	1	2	3
1805	0	7	0	0	1	69.1321	42.8163	68.3836	19.5736	1	1	0	1	0	1	1	1	0	1	1	1	3	3	2	2	2	1	2	1	2	2	2	2	3	1	4	1	2	1
1806	0	7	0	0	0	65.3585	34.6531	62.9041	35.0775	1	1	0	1	0	1	0	0	1	0	0	1	3	1	2	3	2	1	0	2	1	4	3	1	2	1	3	0	4	2
1807	0	7	0	0	0	84.2264	50.9796	82.0822	31.2016	1	1	0	1	0	1	0	1	1	1	3	3	2	2	2	2	2	0	1	2	3	4	2	0	4	0	3	3	4	0
1808	0	7	0	0	1	57.8113	26.4898	54.6849	19.5736	0	0	0	0	1	0	1	0	0	1	2	1	3	3	2	0	2	4	1	2	3	2	0	2	3	1	3	1	0	2
1809	0	8	0	0	0	94.9749	45.1149	69.6602	12.3513	0	0	1	1	1	1	1	1	1	1	1	4	2	1	2	3	1	3	2	2	2	2	2	2	1	1	3	0	2	1
1811	0	8	0	1	1	54.7739	25	55.0971	37.847	0	0	0	0	0	0	0	1	0	1	0	1	4	2	2	1	3	2	1	0	4	1	0	2	4	1	2	3	2	4
1812	0	8	0	0	0	64.8241	56.6092	59.9515	54.8442	0	0	0	1	0	1	0	0	1	1	1	2	0	2	3	0	1	3	1	3	4	4	4	2	3	1	1	0	3	1
1813	0	8	0	1	1	79.8995	47.9885	69.6602	40.6799	1	1	1	1	1	1	1	1	1	1	1	1	3	1	2	2	2	3	4	2	2	1	2	2	2	2	2	1	1	2
1814	0	9	0	0	0	60.2083	40.6688	70.5111	39.6333	1	0	1	1	0	0	1	0	1	1	1	3	2	0	2	4	1	1	2	3	4	1	1	0	1	2	3	0	4	2
1815	0	9	0	0	0	81.0417	47.0382	63.8444	36.3	0	0	0	0	0	0	1	0	0	1	1	4	1	0	2	2	4	1	0	1	0	4	0	3	2	1	4	0	1	3
1816	0	9	0	0	1	75.8333	24.7452	52.7333	46.3	1	0	0	1	0	0	1	0	1	1	1	3	2	1	2	1	0	1	2	3	4	0	3	4	2	0	4	4	0	0
1819	0	9	0	0	1	96.6667	53.4076	68.2889	19.6333	0	0	0	1	0	0	1	0	1	1	1	1	4	1	2	2	1	1	2	2	1	4	1	2	4	2	1	2	2	2
1820	0	9	0	0	1	96.6667	43.8535	61.6222	29.6333	1	1	0	1	0	1	1	0	1	1	1	2	1	2	2	1	2	4	0	4	1	1	4	3	3	1	1	0	3	1
1821	0	10	0	0	1	60.8636	12.5338	67.2345	50.9002	1	0	0	0	0	1	1	0	1	1	2	1	3	4	2	1	0	4	3	2	0	1	1	3	1	1	3	0	2	2
1824	0	10	0	0	1	74.5	19.2905	58.385	43.601	1	0	0	1	0	0	1	1	1	1	1	2	3	2	2	2	1	1	0	2	1	4	3	4	1	0	3	0	1	3
1825	0	10	0	0	0	56.3182	42.9392	60.5973	48.4672	1	0	0	0	0	0	1	1	1	1	1	1	0	1	1	2	2	2	1	3	2	0	4	2	2	3	4	2	4	1
1826	0	10	0	0	1	79.0455	15.9122	65.0221	53.3333	1	1	0	1	0	1	1	1	0	1	2	1	2	2	2	3	2	1	2	0	3	3	1	2	2	1	3	2	2	1
1827	0	10	0	0	1	79.0455	39.5608	51.7478	50.9002	0	0	0	1	0	1	1	0	1	1	2	2	2	2	2	2	2	2	2	2	2	2	2	2	2	2	2	0	2	2
1828	0	11	0	1	0	64.6875	44.2716	63.7166	29.703	1	0	0	1	0	0	1	1	1	1	3	2	1	2	1	3	0	0	4	1	4	2	3	2	2	1	2	0	3	1
1829	0	11	0	0	0	82.0486	54.1481	71.9302	39.604	1	0	0	0	0	0	1	0	1	1	3	1	2	1	2	2	4	0	2	1	3	1	1	2	3	3	1	2	1	3
1830	0	12	0	0	0	52.9767	40.7237	58.0477	61.1395	1	0	0	0	0	0	1	1	1	1	3	2	3	2	2	2	1	3	0	3	1	3	3	0	1	0	2	2	4	0
1831	0	12	0	0	0	43.6744	34.1447	38.5249	65.7907	1	0	0	1	0	1	1	1	1	1	0	4	2	1	2	1	2	1	2	3	1	2	3	0	3	2	3	1	3	0
1832	0	12	0	0	0	39.0233	17.6974	53.7093	40.2093	0	0	0	1	0	0	1	1	0	1	3	4	2	3	2	0	1	1	2	2	1	3	2	4	1	2	1	0	3	1
1833	0	12	0	0	0	52.9767	17.6974	29.8482	37.8837	1	1	0	0	0	0	0	0	0	0	2	2	2	2	2	2	2	2	2	2	2	2	2	2	2	2	2	2	2	2
1834	0	13	0	0	0	45.2817	37.5696	63.8622	52.9065	1	1	0	1	0	0	1	0	1	1	1	3	3	3	2	2	2	3	1	2	1	3	1	3	2	0	3	0	3	0
1835	0	13	0	0	1	55.8451	57.8228	68.0376	42.7439	0	0	0	1	0	0	1	0	0	0	3	2	1	3	2	2	1	1	2	1	3	3	2	1	2	2	2	0	3	2
1836	0	13	0	0	0	41.7606	45.1646	32.547	63.0691	0	0	0	1	0	1	1	0	0	1	1	2	3	1	1	1	3	4	0	3	1	3	0	3	1	3	1	4	0	2
1838	0	13	0	1	0	38.2394	29.9747	42.9854	50.874	0	0	0	1	0	1	0	0	1	1	2	2	2	2	2	2	2	2	2	2	2	2	2	2	2	2	2	2	2	2
1839	0	13	0	0	1	48.8028	50.2278	47.1608	42.7439	1	1	0	1	0	0	1	1	0	1	2	1	2	3	2	1	3	1	4	3	3	3	3	3	1	0	1	0	1	1
1840	0	14	0	0	0	62.5738	33.3641	64.7347	46.8382	1	0	1	1	0	0	1	0	0	1	3	3	4	2	2	1	1	2	1	0	1	3	2	0	4	0	3	0	3	1
1841	0	14	0	0	1	66.7932	26.4516	62.6939	59.0931	1	0	1	1	0	0	1	1	1	1	2	2	3	3	2	1	3	1	2	3	2	2	2	1	3	1	1	0	2	2
1842	0	14	0	0	0	49.9156	33.3641	52.4898	49.2892	1	1	0	1	0	1	1	1	0	1	4	2	3	2	2	1	3	2	2	1	2	2	1	0	3	0	2	2	3	1
1843	0	14	0	1	0	49.9156	49.4931	54.5306	51.7402	1	1	1	0	0	1	1	1	1	1	4	2	1	2	2	1	0	0	0	1	2	3	4	4	2	0	4	1	4	1
1845	0	14	0	0	0	58.3544	35.6682	50.449	34.5833	0	1	0	1	0	1	1	0	0	1	3	3	2	1	2	1	2	0	4	2	1	3	3	1	2	1	1	0	3	1
1846	0	14	0	0	0	45.6962	35.6682	56.5714	59.0931	1	0	0	1	0	0	1	0	1	0	3	1	3	1	2	2	0	2	1	3	1	4	1	3	3	0	1	2	3	2
1847	0	15	0	0	0	37.3478	51.358	63.1993	32.8329	1	0	0	1	0	0	1	1	1	1	4	3	2	2	2	2	1	2	2	1	1	2	3	3	1	0	0	0	4	2
1848	0	15	0	0	0	50.3913	17.4074	57.9545	59.4673	0	0	0	0	0	1	1	1	1	1	2	1	1	2	2	1	3	2	1	4	0	2	3	0	2	4	4	0	2	0
1849	1	7	0	0	0	45.2414	47.2927	54.8975	46.371	0	0	0	1	0	1	0	0	1	1	2	3	1	0	2	0	2	0	2	1	0	2	2	3	4	4	2	0	4	0
1851	1	8	0	0	1	76.8896	50.5728	49.7201	30.6122	0	0	0	0	0	0	1	0	1	1	2	1	3	1	2	2	1	3	2	3	0	4	2	1	2	1	2	0	1	2
1853	1	9	0	1	0	61.8769	45.355	73.0652	44.1473	0	0	0	1	0	0	1	0	1	0	2	1	3	1	1	2	4	2	1	1	1	1	3	4	1	3	3	1	1	1
1854	1	9	0	0	0	55.7231	45.355	55.6739	55.7752	1	0	0	0	0	1	1	0	1	1	2	1	1	2	2	2	0	3	3	3	2	2	3	1	2	2	3	2	1	1
1856	1	10	0	0	0	43.8163	50.1944	43.3839	41.8124	1	0	0	1	0	1	1	0	0	1	2	1	3	1	2	0	1	2	4	2	2	1	3	4	1	1	1	2	4	2
1857	1	10	0	0	1	43.8163	33.5278	62.9067	48.209	1	0	0	0	0	1	0	1	1	1	2	4	3	4	2	1	0	1	1	0	2	1	3	1	3	2	1	3	1	3
1859	1	11	0	1	0	50.9375	38.5953	64.2444	46.2217	1	0	0	0	0	1	1	0	0	0	2	2	2	2	2	2	2	2	2	2	2	2	2	2	2	2	2	2	2	2
1861	1	12	0	0	0	60.7483	14.6177	52.9325	54.9742	0	0	0	1	0	1	1	0	1	0	1	3	2	2	2	3	2	1	0	3	2	2	2	3	1	2	2	2	3	0
1862	1	12	0	0	0	40.3401	29.9083	63.481	42.0876	0	1	0	1	0	1	1	1	1	1	2	2	2	2	2	2	2	2	2	2	2	2	2	2	2	2	2	2	2	2
1865	1	12	0	0	1	64.1497	36.0245	61.3713	49.8196	1	0	0	1	0	0	1	1	0	0	3	1	2	4	2	3	1	2	4	2	1	3	0	1	3	1	1	1	2	1
1866	1	13	0	1	1	50.9552	43.141	59.6238	30.4795	1	1	1	1	1	1	1	1	1	1	2	2	2	2	2	2	2	2	2	2	2	2	2	2	2	2	2	2	2	2
1867	1	14	0	0	1	50.5357	53.4431	54.6735	39.4989	1	1	0	1	0	0	1	1	1	0	2	3	4	1	2	1	0	0	4	0	2	0	1	3	4	2	1	0	2	3
1868	1	14	0	0	1	57.6786	47.4551	62.8367	65.6427	1	1	0	1	0	0	1	1	0	1	2	3	4	1	2	2	1	4	2	0	2	0	1	1	2	1	2	1	4	1
1869	1	14	0	0	0	61.25	41.4671	62.8367	52.5708	1	1	1	1	0	0	0	0	1	1	2	2	1	4	2	4	0	1	1	2	3	2	1	0	2	4	1	0	2	4
1870	1	14	0	0	1	46.9643	41.4671	52.6327	37.3203	1	1	1	1	0	1	1	1	1	1	2	1	1	1	2	0	3	2	4	3	1	2	3	3	3	0	1	3	1	0
1871	1	15	0	0	1	48.2168	46.2559	37.4506	65.4795	1	0	0	1	0	0	1	0	0	1	4	4	4	2	2	2	0	1	2	1	1	1	4	3	2	1	1	0	1	0
1873	1	15	0	0	0	48.2168	46.2559	53.2609	65.4795	1	0	0	1	0	1	1	1	1	1	4	2	3	2	4	3	1	0	1	1	2	0	3	0	1	1	3	1	4	2
1874	0	7	0	0	1	95.5472	50.9796	57.4247	27.3256	1	1	0	0	1	1	1	0	1	1	2	2	2	2	2	1	2	2	3	2	3	1	2	3	1	3	2	1	3	1
1875	0	7	0	0	1	46.4906	10.1633	68.3836	27.3256	0	0	1	0	1	1	1	1	1	1	3	2	2	2	2	1	2	1	3	2	1	1	2	3	1	3	2	2	1	3
1876	0	7	0	0	0	61.5849	18.3265	65.6438	19.5736	1	0	0	1	0	1	0	0	1	0	2	3	2	0	2	0	2	2	2	2	2	2	2	3	1	4	2	0	4	0
1882	0	8	0	0	0	44.7236	39.3678	42.9612	49.1785	0	1	1	1	1	1	1	1	1	1	4	1	1	2	2	2	2	2	0	0	1	4	2	0	4	1	4	1	4	0
1883	0	9	0	0	0	60.2083	24.7452	59.4	39.6333	0	1	0	0	0	0	0	1	1	1	4	2	1	1	2	2	1	4	4	2	0	0	0	4	1	4	2	0	2	0
1884	0	9	0	0	1	55	43.8535	63.8444	36.3	1	0	0	0	0	0	1	0	1	1	2	1	1	3	2	4	2	2	2	1	3	1	2	3	1	3	1	2	1	2
1885	0	10	0	0	0	88.1364	32.8041	67.2345	43.601	1	0	0	1	0	0	1	1	1	1	1	2	3	2	2	2	2	1	4	4	4	1	2	0	3	0	4	0	4	0
1886	0	10	0	0	0	56.3182	22.6689	73.8717	31.4355	0	0	0	0	0	0	1	0	1	1	2	2	0	0	2	0	1	4	2	2	0	4	4	0	4	0	4	0	4	0
1887	0	11	0	1	1	43.8542	36.8642	49.3429	39.604	0	0	0	1	0	1	1	0	1	1	1	4	4	2	2	2	0	1	3	3	0	3	4	0	0	0	2	1	4	2
1888	0	12	0	0	1	71.5814	44.0132	58.0477	42.5349	1	0	0	1	0	1	1	0	1	1	2	2	2	0	2	3	2	2	2	2	2	2	2	2	2	2	2	2	2	1
1889	0	12	0	0	1	43.6744	50.5921	49.3709	49.5116	1	1	0	1	0	0	1	1	1	1	3	2	2	2	2	2	2	2	2	2	2	2	2	2	2	2	2	2	2	0
1890	0	13	0	0	0	48.8028	62.8861	55.5115	54.939	0	1	0	1	0	1	1	0	0	1	3	4	2	1	1	4	0	1	3	0	4	4	1	0	1	0	3	0	4	0
1891	0	13	0	0	0	41.7606	47.6962	55.5115	30.5488	1	0	0	1	0	0	1	1	1	1	2	2	4	2	2	2	1	2	2	1	1	1	2	1	4	1	2	2	4	1
1894	0	13	0	0	1	52.3239	47.6962	53.4238	42.7439	1	1	1	1	0	1	1	1	1	1	4	4	4	2	2	1	0	0	3	2	0	4	1	1	1	0	4	1	3	0
1895	0	13	0	0	1	48.8028	40.1013	61.7745	59.0041	1	1	0	1	0	1	1	1	0	0	2	3	2	1	2	2	1	0	4	3	0	1	2	1	3	1	3	1	2	3
1896	0	14	0	0	1	45.6962	49.4931	64.7347	44.3873	1	0	0	1	0	1	1	1	1	1	3	2	1	3	2	3	2	3	1	2	2	3	2	1	2	3	0	2	3	0
1897	0	14	0	0	0	54.135	35.6682	56.5714	54.1912	1	1	0	1	0	1	1	0	1	1	2	2	2	1	2	1	2	1	4	1	4	2	4	3	1	0	2	0	3	0
1898	0	14	0	0	0	66.7932	49.4931	70.8571	37.0343	0	0	0	0	0	1	1	1	1	1	2	3	3	2	2	2	2	2	3	1	1	2	1	2	3	0	1	3	3	2
1899	0	14	0	0	0	71.0127	42.5806	70.8571	49.2892	1	0	0	0	0	0	1	1	1	1	3	3	3	4	2	1	1	2	2	1	1	2	2	1	1	2	3	2	3	2
1900	0	14	0	0	1	49.9156	42.5806	58.6122	54.1912	1	0	0	1	0	0	1	1	1	1	2	2	1	3	2	0	1	2	4	2	2	4	3	1	2	1	2	1	4	2
1902	1	7	0	0	0	41.7931	54.6098	45.7859	54.4355	1	1	1	1	1	1	0	1	1	1	1	2	2	2	2	1	4	0	3	3	0	2	3	2	0	1	3	4	1	2
1903	1	8	0	0	1	63.5117	38.6396	62.4427	39.3586	0	0	1	0	0	1	1	1	1	1	2	0	2	2	2	2	2	2	0	1	4	4	2	0	4	0	3	4	0	0
1905	1	8	0	0	1	56.8227	48.1862	62.4427	36.4431	1	0	0	1	0	0	1	0	1	1	3	3	1	2	2	1	0	2	2	2	1	3	1	0	2	4	3	2	3	3
1906	1	9	0	1	1	52.6462	30.5621	44.8043	38.3333	0	0	0	1	0	0	1	0	1	1	1	3	2	1	2	2	2	2	2	3	2	2	3	1	3	1	1	2	3	2
1907	1	9	0	0	0	71.1077	48.3136	60.0217	48.0233	1	0	0	0	0	0	1	1	1	1	1	2	2	3	2	4	2	0	2	2	1	4	2	0	1	2	4	0	1	2
1908	1	10	0	0	1	54.417	47.4167	75.9219	41.8124	1	1	0	1	0	0	1	1	1	1	3	1	2	4	2	2	1	3	1	1	4	2	4	1	2	1	1	0	1	1
1909	1	10	0	1	0	57.9505	36.3056	56.3991	43.9446	0	1	0	0	1	0	1	0	1	0	2	2	2	2	2	1	1	1	1	2	3	3	3	3	3	2	2	2	2	2
1911	1	11	0	0	1	54.4097	28.5619	64.2444	51.2594	1	0	0	1	0	1	1	0	1	1	4	1	1	4	2	2	1	1	0	1	1	4	2	3	4	3	1	1	4	1
1913	1	12	0	0	0	57.3469	32.9664	57.1519	36.933	0	0	0	0	0	0	1	0	1	1	2	1	3	1	2	2	1	2	3	2	1	2	2	1	3	1	3	2	3	1
1914	1	12	0	0	0	50.5442	17.6758	46.6034	57.5515	1	0	0	0	0	0	1	0	1	1	3	3	2	1	2	2	3	1	3	2	3	1	2	2	1	2	1	0	1	3
1915	1	14	0	0	0	46.9643	41.4671	64.8776	43.8562	0	0	0	0	0	0	1	1	1	1	1	0	3	4	2	2	3	2	3	1	0	1	1	2	4	1	4	0	1	1
1918	1	15	0	0	0	48.2168	46.2559	67.0949	51.7808	0	0	0	0	0	1	1	1	1	1	3	4	2	2	2	3	1	1	2	1	2	3	3	1	1	1	1	1	3	2
1919	1	15	0	0	0	37.7273	50.9953	49.3083	56.347	1	1	1	1	1	1	1	1	1	1	3	2	3	2	2	3	1	1	4	3	1	1	0	1	4	0	4	0	3	0
1924	0	8	0	0	0	54.7739	50.8621	45.3883	46.3456	0	1	0	0	0	1	1	1	1	1	4	2	2	1	2	2	2	0	1	1	4	2	0	2	3	2	2	2	4	0
1925	0	8	0	0	0	44.7236	53.7356	47.8155	60.5099	1	1	0	1	0	1	1	1	1	1	3	1	2	2	2	2	2	1	1	1	3	2	2	2	2	3	2	2	4	0
1926	0	8	0	0	0	39.6985	45.1149	40.534	63.3428	1	0	1	1	0	1	1	1	1	1	3	2	2	3	2	2	2	0	1	0	3	3	2	0	4	0	3	3	4	0
1927	0	8	0	0	1	44.7236	50.8621	42.9612	60.5099	0	0	1	1	0	1	1	1	1	1	3	3	3	2	2	2	2	2	3	3	3	2	2	1	0	1	2	3	1	0
1928	0	8	0	0	0	39.6985	30.7471	47.8155	43.5127	0	0	0	0	0	0	1	0	0	1	2	3	3	2	2	2	1	1	3	1	2	3	2	1	2	2	3	0	3	1
1930	0	10	0	0	0	65.4091	42.9392	56.1726	46.0341	1	0	0	0	0	0	1	0	0	1	2	1	4	0	2	2	3	0	1	3	1	4	1	4	2	1	0	4	2	0
1931	0	10	0	0	0	60.8636	42.9392	67.2345	60.6326	1	0	0	1	0	1	1	0	0	1	4	3	3	1	2	2	0	0	3	0	3	4	3	1	3	2	0	0	3	0
1932	0	11	0	0	0	47.3264	61.5556	63.7166	47.5248	0	1	0	0	0	0	1	0	0	1	1	4	2	3	2	1	1	3	4	2	0	2	3	1	2	0	2	1	4	2
1934	0	12	0	0	1	52.9767	50.5921	53.7093	61.1395	1	1	1	1	1	1	1	1	1	1	3	2	3	4	2	1	2	0	2	1	2	1	2	0	1	4	3	2	3	4
1935	0	13	0	0	0	59.3662	35.038	59.6868	44.7764	0	1	0	1	0	0	1	0	0	1	2	4	2	2	2	1	3	1	2	1	1	2	1	4	4	1	3	0	3	0
1938	0	13	0	0	0	59.3662	35.038	51.3361	40.7114	0	0	0	0	0	1	1	0	1	1	2	2	1	2	2	3	1	2	3	1	3	3	2	3	1	2	3	1	2	0
1939	0	14	0	0	1	54.135	56.4055	68.8163	61.5441	0	0	0	1	0	0	1	1	1	1	1	3	3	2	2	2	1	2	1	1	0	1	3	0	0	4	4	4	4	4
1940	0	14	0	0	0	75.2321	56.4055	52.4898	49.2892	1	1	0	1	0	0	1	1	1	1	3	2	3	1	2	1	2	0	1	3	1	3	1	2	2	3	4	0	4	0
1941	0	14	0	0	0	54.135	17.235	52.4898	63.9951	1	0	0	1	0	1	1	1	0	1	4	3	4	1	#NULL!	0	1	1	4	2	0	3	1	1	2	2	2	0	3	3
1942	0	14	0	0	0	41.4768	44.8848	54.5306	54.1912	1	0	0	1	0	1	1	1	1	0	3	4	3	3	3	2	1	0	1	1	0	3	2	1	2	1	3	2	4	2
1943	0	14	0	0	0	58.3544	42.5806	48.4082	54.1912	1	1	0	1	0	0	1	0	0	1	1	3	2	2	2	2	1	1	4	3	3	3	3	1	1	1	3	2	3	2
1944	0	14	0	0	1	58.3544	33.3641	68.8163	37.0343	1	1	0	1	0	0	1	0	1	1	3	2	2	4	2	1	2	4	2	3	1	2	1	0	4	1	2	1	3	1
1945	0	14	0	0	1	45.6962	51.7972	60.6531	51.7402	1	1	0	1	0	1	1	1	1	1	2	3	4	1	2	3	2	3	3	3	2	0	2	0	2	0	2	1	3	2
1949	1	8	0	0	1	66.8562	38.6396	64.9873	39.3586	0	1	0	1	0	1	1	0	1	0	0	2	1	4	2	2	2	1	3	1	1	2	2	3	4	1	2	0	1	4
1950	1	9	0	1	0	46.4923	48.3136	51.3261	53.8372	1	0	0	0	0	0	1	0	0	1	1	2	1	3	2	4	0	3	2	4	1	4	0	1	4	0	2	0	4	2
1951	1	9	0	0	1	55.7231	42.3964	49.1522	49.9612	1	0	0	1	0	0	1	1	1	1	1	2	3	1	2	2	1	4	2	3	1	2	0	1	1	3	1	3	4	4
1952	1	9	0	0	0	40.3385	54.2308	44.8043	59.6512	1	0	1	1	0	1	1	1	1	1	3	4	1	2	2	1	2	2	1	2	0	2	2	2	2	0	2	4	4	0
1953	1	10	0	0	1	57.9505	36.3056	58.5683	61.0021	1	1	1	1	0	1	1	0	1	1	1	3	3	1	2	2	2	1	2	1	3	1	3	4	3	2	1	0	3	0
1955	1	11	0	0	0	37.0486	35.2508	57.5778	56.2972	1	0	0	1	0	0	1	0	0	1	2	3	4	1	2	1	4	0	1	1	2	3	0	2	3	3	1	0	3	2
1956	1	11	0	0	1	57.8819	35.2508	55.3556	48.7406	1	0	0	1	0	0	1	1	0	1	4	0	2	1	2	3	2	2	1	4	0	1	3	2	4	0	2	0	2	2
1957	1	11	0	0	1	64.8264	21.8729	64.2444	43.7028	0	0	0	1	0	0	1	0	0	1	0	2	3	1	2	4	4	3	2	3	1	2	1	0	4	1	2	1	2	0
1959	1	12	0	0	0	47.1429	39.0826	50.8228	57.5515	0	0	0	0	0	0	1	1	0	1	2	3	3	1	2	2	2	1	3	0	3	3	3	1	3	1	1	2	1	2
1961	1	13	0	0	1	68.8657	30.3205	65.5644	48.7443	0	0	0	0	0	0	1	1	0	1	0	1	0	2	2	1	4	4	2	1	4	3	1	3	1	3	1	4	2	4
1963	1	13	0	0	1	77.8209	30.3205	57.6436	44.1781	1	0	0	0	0	0	1	1	1	1	4	4	4	2	2	1	0	1	1	2	2	2	2	2	2	2	2	2	3	2
1964	1	13	0	0	0	50.9552	20.7051	57.6436	60.1598	0	0	0	1	0	0	0	1	1	1	0	0	0	4	2	0	4	4	4	4	4	0	0	4	3	4	0	3	0	3
1968	1	15	0	0	0	48.2168	46.2559	63.1423	42.6484	1	1	0	1	0	0	1	0	1	1	4	2	3	1	2	1	3	1	2	0	1	1	4	2	3	2	2	0	3	0
1971	0	8	0	0	1	44.7236	30.7471	50.2427	35.0142	1	0	1	1	0	1	1	1	1	1	2	2	2	2	2	2	0	0	1	3	4	4	2	0	4	1	3	4	4	0
1974	0	9	0	0	1	60.2083	43.8535	68.2889	42.9667	0	0	0	1	0	0	1	0	1	1	1	3	4	1	2	4	2	1	3	1	3	2	1	2	1	2	1	1	4	0
1976	0	11	0	0	0	43.8542	36.8642	47.2895	43.5644	0	0	0	0	0	1	1	1	0	1	4	2	2	1	2	2	2	0	3	1	2	0	1	4	2	3	1	3	4	0
1977	0	11	0	0	0	54.2708	46.7407	63.7166	43.5644	0	0	0	1	0	1	1	0	0	1	4	2	1	1	2	4	2	3	0	2	0	1	3	1	0	4	3	0	3	2
1978	0	11	0	0	0	47.3264	51.679	51.3963	57.4257	1	0	1	1	0	1	1	1	1	1	2	2	1	2	2	2	2	0	1	1	3	2	3	4	2	3	2	4	2	0
1979	0	12	0	0	0	48.3256	44.0132	53.7093	63.4651	0	0	0	1	0	0	1	0	0	1	3	4	2	2	2	1	2	1	3	2	2	3	1	4	1	1	3	1	3	1
1980	0	12	0	0	1	57.6279	40.7237	55.8785	56.4884	1	0	0	1	0	0	1	0	1	1	2	3	4	2	2	3	1	4	0	3	3	1	2	4	1	2	1	0	4	0
1981	0	12	0	0	0	43.6744	40.7237	53.7093	37.8837	1	0	0	1	0	0	1	0	1	1	3	4	3	1	2	4	0	0	1	4	3	4	4	0	1	1	2	0	4	0
1982	0	12	0	0	0	48.3256	47.3026	49.3709	47.186	1	0	0	1	0	0	1	1	0	1	4	3	3	2	2	2	1	1	3	2	2	3	3	0	1	2	3	0	4	0
1984	0	12	0	0	0	48.3256	20.9868	60.2169	47.186	0	0	0	1	0	0	1	1	0	1	2	3	3	1	1	2	3	1	3	1	2	1	1	3	2	3	2	1	3	2
1985	0	12	0	0	1	57.6279	47.3026	55.8785	61.1395	1	1	0	1	0	0	1	1	1	1	4	2	4	1	2	3	0	0	0	0	4	2	4	4	4	0	0	1	3	1
1988	0	13	0	0	0	55.8451	47.6962	42.9854	38.6789	0	0	0	0	0	0	1	0	0	1	3	4	2	1	3	3	1	0	3	2	0	3	3	1	3	0	2	0	4	0
1989	0	13	0	0	1	55.8451	40.1013	72.2129	54.939	0	0	0	1	0	0	1	1	1	1	3	3	2	1	2	2	1	1	3	1	1	3	3	0	1	0	4	4	4	4
1991	0	13	0	0	0	55.8451	55.2911	51.3361	50.874	1	1	0	1	0	0	1	1	1	1	2	3	3	1	1	2	1	1	1	1	1	3	3	3	3	2	2	1	3	3
1992	0	13	0	0	0	48.8028	52.7595	61.7745	50.874	1	1	0	0	0	0	1	1	1	1	1	3	3	4	2	3	1	1	2	3	2	4	4	1	1	1	1	0	3	2
1993	0	13	0	0	0	55.8451	27.443	68.0376	34.6138	1	0	0	1	0	0	1	1	0	1	3	2	3	4	2	1	3	1	0	2	1	2	3	1	3	1	3	1	2	3
1994	0	14	0	0	0	49.9156	51.7972	64.7347	54.1912	1	0	0	1	0	0	1	0	1	1	3	2	2	2	2	2	3	2	4	1	1	3	3	1	1	1	2	3	1	0
1995	0	14	0	0	1	54.135	19.5392	32.0816	37.0343	1	0	0	0	0	0	1	0	1	1	2	3	2	2	2	2	2	2	2	2	2	2	2	2	2	2	2	3	3	2
1996	0	14	0	0	0	49.9156	35.6682	68.8163	39.4853	0	1	0	1	0	0	1	0	1	1	2	2	3	4	2	0	0	4	2	2	1	2	4	1	4	3	2	0	2	0
2002	1	8	0	0	1	50.1338	24.3198	49.7201	45.1895	0	0	0	1	1	1	1	1	1	1	0	3	2	1	2	3	4	0	1	2	3	4	0	1	2	3	4	2	1	4
2003	1	8	0	0	0	53.4783	33.8663	47.1756	36.4431	0	0	0	0	1	1	0	0	1	1	2	3	1	0	0	0	2	2	3	3	2	2	2	4	1	2	4	1	2	4
2005	1	8	0	0	1	63.5117	36.253	64.9873	30.6122	1	1	1	1	0	1	1	1	1	1	2	3	0	2	2	2	1	3	1	1	4	4	0	1	2	3	3	2	1	4
2006	1	8	0	0	1	46.7893	50.5728	47.1756	62.6822	1	0	1	1	0	1	1	1	1	1	3	1	2	2	2	2	2	2	1	2	2	4	2	0	4	2	2	2	4	0
2007	1	9	0	0	0	52.6462	36.4793	42.6304	55.7752	0	0	0	0	0	1	1	1	1	1	4	0	2	2	2	2	2	2	1	2	3	3	1	0	1	4	4	1	4	2
2008	1	11	0	0	0	50.9375	41.9398	64.2444	28.5894	0	0	0	1	0	1	0	0	0	1	2	3	2	2	2	2	3	2	2	1	2	3	2	2	2	1	3	2	1	1
2009	1	11	0	0	1	75.2431	35.2508	62.0222	56.2972	0	0	0	1	0	0	1	1	1	1	1	3	3	2	2	1	1	4	3	2	1	3	2	0	1	4	2	3	2	3
2010	1	13	0	0	1	44.9851	39.9359	67.5446	48.7443	1	1	0	1	1	1	0	1	1	1	2	3	2	3	2	1	2	2	1	3	1	1	3	1	3	2	1	4	4	3
2014	0	7	0	0	1	46.4906	18.3265	73.863	27.3256	0	0	0	0	1	0	1	0	1	1	1	2	3	1	2	3	1	2	1	1	2	4	3	1	3	2	4	2	1	3
2015	0	7	0	0	0	38.9434	55.0612	60.1644	35.0775	1	0	0	0	0	1	1	1	0	1	2	3	4	1	2	2	3	1	1	2	3	3	4	2	1	0	3	0	4	0
2023	0	12	0	0	0	52.9767	47.3026	58.0477	65.7907	0	0	0	0	0	0	1	1	1	1	2	3	4	2	2	2	2	1	1	1	1	1	3	3	3	1	4	1	4	1
2024	0	12	0	0	1	43.6744	37.4342	49.3709	65.7907	0	0	0	0	0	0	1	0	0	1	3	4	3	1	2	1	1	4	2	0	1	1	3	4	1	1	4	1	1	2
2025	0	12	0	0	1	57.6279	40.7237	53.7093	42.5349	1	1	1	0	0	1	1	1	1	1	3	3	3	3	2	3	2	2	1	2	3	2	2	1	1	3	3	0	3	1
2026	0	13	0	0	0	59.3662	29.9747	72.2129	50.874	1	1	0	1	0	1	1	1	1	1	2	3	3	4	2	2	2	1	2	2	2	2	2	2	2	2	2	3	1	2
2027	0	13	0	0	0	73.4507	37.5696	47.1608	42.7439	1	0	0	1	0	0	1	1	1	1	1	2	2	3	2	2	4	3	2	3	4	3	4	2	1	0	1	2	3	1
2031	0	14	0	0	1	41.4768	42.5806	56.5714	37.0343	1	0	0	0	0	1	1	1	0	0	3	2	2	2	2	2	2	3	2	2	3	2	3	1	2	2	2	1	3	2
2032	0	14	0	0	1	45.6962	44.8848	52.4898	59.0931	0	1	1	1	0	1	1	1	1	1	2	4	3	1	2	2	1	0	0	1	2	3	4	2	3	2	2	3	3	0
2034	1	7	0	0	1	83.1724	39.9756	59.4533	35.6183	1	1	0	0	0	0	1	1	1	1	3	1	2	3	2	1	2	3	1	4	1	2	3	1	2	3	1	2	4	3
2037	1	9	0	1	1	49.5692	21.6864	73.0652	44.1473	0	1	0	0	0	0	1	1	0	1	2	1	3	0	2	4	0	1	4	2	3	0	3	4	1	4	2	4	0	2
2040	1	11	0	0	1	37.0486	45.2843	50.9111	68.8917	1	0	0	1	0	0	1	0	0	1	1	1	4	4	2	4	4	2	3	2	2	1	3	1	2	2	1	1	0	0
2042	1	11	0	0	1	50.9375	18.5284	77.5778	41.1839	1	1	0	1	0	0	1	1	1	1	2	3	2	3	3	1	3	3	2	4	1	1	1	3	2	1	1	3	3	2
2043	1	12	0	0	1	47.1429	29.9083	67.7004	42.0876	0	1	0	1	0	0	1	1	1	1	3	1	4	1	2	1	1	1	1	2	4	4	2	1	4	1	2	2	4	1
2044	1	14	0	1	1	50.5357	38.4731	68.9592	46.0349	1	1	1	1	0	1	1	1	1	1	2	2	2	2	2	2	4	2	3	3	3	3	3	2	2	0	1	3	1	2
2046	1	14	0	0	1	64.8214	32.485	58.7551	43.8562	1	0	1	0	0	0	1	0	0	1	0	3	4	4	2	1	3	2	1	2	3	0	1	3	2	2	4	2	4	3
2050	0	13	0	0	0	41.7606	40.1013	59.6868	56.9715	0	0	0	1	0	0	1	1	1	1	3	3	2	2	2	2	2	2	3	2	2	3	2	3	2	1	2	0	3	2
2051	0	14	0	0	1	49.9156	51.7972	50.449	61.5441	1	1	0	1	0	1	1	1	1	1	3	3	4	1	3	2	2	1	1	3	0	4	3	0	0	1	1	4	4	0
2052	0	14	0	1	1	58.3544	42.5806	70.8571	39.4853	0	0	0	1	0	0	1	1	1	1	2	3	2	3	2	2	2	2	2	2	1	3	3	1	3	2	2	2	3	3
2054	0	14	0	1	1	49.9156	49.4931	64.7347	59.0931	1	0	0	1	0	0	1	1	0	1	3	4	4	3	2	3	1	1	1	4	2	2	4	0	3	0	0	1	4	3
2058	1	7	0	0	1	65.931	47.2927	59.4533	30.2419	1	0	0	0	0	0	1	0	0	1	3	4	2	1	2	3	4	2	4	1	0	0	1	0	2	4	3	2	2	2
2061	1	9	0	0	0	61.8769	48.3136	62.1957	53.8372	0	1	0	0	0	0	1	0	0	1	1	2	4	3	2	3	4	2	1	2	3	2	1	2	1	2	3	1	2	3
2063	1	10	0	0	1	65.0177	44.6389	58.5683	50.3412	1	0	0	0	1	0	1	1	1	1	2	3	4	2	2	3	2	1	4	1	3	1	2	2	1	3	2	1	3	1
2068	1	12	0	0	1	53.9456	29.9083	69.8101	36.933	0	0	1	1	0	1	1	0	1	1	3	3	3	2	2	2	1	0	1	3	3	1	4	0	4	1	3	4	4	1
2071	1	15	0	0	0	44.7203	53.3649	69.0711	51.7808	1	0	0	1	0	1	1	0	1	1	2	2	3	2	2	3	1	2	2	2	1	3	2	3	3	2	2	2	3	2
2073	0	12	0	0	0	43.6744	30.8553	49.3709	54.1628	0	0	0	0	0	1	1	1	1	1	3	3	3	2	2	3	1	0	0	3	0	4	4	4	2	0	2	2	4	0
2075	0	13	0	1	1	38.2394	55.2911	49.2484	52.9065	1	0	0	1	0	0	1	1	1	1	4	3	4	3	2	3	1	1	4	3	1	1	2	1	2	0	4	0	4	1
2076	0	14	0	0	0	49.9156	49.4931	66.7755	46.8382	1	1	1	1	0	0	1	0	0	1	2	3	4	3	4	2	1	0	4	2	1	2	4	0	4	1	2	0	4	1
2077	0	15	0	0	1	59.087	39.0123	57.9545	40.0969	1	0	0	0	0	1	1	1	1	1	3	2	0	1	2	1	4	4	1	1	1	3	2	3	3	2	1	3	4	4
2079	1	7	0	0	0	65.931	47.2927	61.7312	24.8656	1	0	0	0	0	0	0	1	1	1	2	3	1	3	2	3	1	2	3	2	1	3	3	2	3	2	3	2	1	1
2082	1	8	0	0	1	40.1003	43.4129	44.631	59.7668	0	0	1	1	0	1	1	1	1	1	2	2	1	1	2	2	2	1	1	2	3	4	3	2	2	2	3	4	4	1
2083	1	9	0	0	0	55.7231	30.5621	62.1957	46.0853	1	0	0	1	0	1	1	1	0	0	1	2	2	1	2	4	2	3	2	2	3	0	3	2	3	2	3	2	4	2
2086	1	13	0	0	0	53.9403	59.1667	63.5842	46.4612	1	0	0	1	0	0	1	1	1	1	3	1	4	3	2	2	1	2	2	3	3	3	3	3	3	2	1	1	1	2
2095	0	12	0	0	1	76.2326	20.9868	55.8785	40.2093	1	1	1	1	1	1	1	1	0	1	4	4	2	2	2	2	2	2	2	2	2	2	2	3	3	2	2	3	2	2
2096	0	13	0	0	0	48.8028	50.2278	53.4238	59.0041	1	1	1	1	0	1	1	1	1	1	4	3	3	2	2	3	2	1	3	3	3	2	3	1	3	2	2	1	3	0
2099	1	8	0	0	0	46.7893	41.0263	54.8092	51.0204	0	0	0	1	0	1	1	1	1	1	2	2	2	4	2	4	2	0	1	2	2	4	2	0	3	3	4	4	4	0
2100	1	9	0	0	0	37.2615	45.355	42.6304	57.7132	0	1	0	1	0	0	1	0	0	1	1	2	4	3	2	3	4	2	3	1	2	2	1	3	1	3	2	1	2	3
2101	1	9	0	0	1	40.3385	54.2308	42.6304	61.5891	1	1	1	1	0	1	1	0	1	1	3	3	4	2	2	3	0	4	1	2	1	3	4	1	0	1	3	1	3	4
2104	1	11	0	1	0	54.4097	51.9732	48.6889	66.3728	1	0	1	1	0	1	1	1	1	1	1	4	2	2	2	4	1	2	0	3	3	2	4	3	2	1	4	2	4	1
2105	1	11	0	0	0	40.5208	55.3177	66.4667	61.335	0	0	0	0	0	0	1	0	1	0	2	1	3	1	4	3	0	1	3	2	1	1	2	3	3	4	4	3	2	1
2106	1	12	0	0	1	43.7415	48.2569	63.481	49.8196	1	1	1	1	1	1	1	1	1	1	1	2	2	3	2	4	2	1	2	1	1	3	4	3	2	2	2	3	4	4
2109	1	15	0	1	1	55.2098	62.8436	73.0237	35.7991	1	1	0	1	0	1	1	1	1	1	4	4	4	4	4	1	1	0	0	2	1	3	4	0	3	2	1	4	4	4
2113	0	13	0	0	0	41.7606	29.9747	61.7745	34.6138	1	1	1	1	0	0	1	1	1	1	3	3	3	1	2	2	1	1	2	1	2	3	4	3	3	1	3	2	3	3
2117	1	9	0	1	0	40.3385	39.4379	46.9783	51.8992	0	1	1	1	1	1	1	1	1	1	3	2	2	4	2	2	2	1	3	0	1	3	4	1	2	4	4	2	4	0
2121	1	14	0	0	1	64.8214	50.4491	44.4694	52.5708	1	1	0	1	0	0	1	1	1	1	1	2	4	1	2	1	2	1	2	4	2	2	2	3	2	4	4	3	3	3
2123	0	7	0	0	0	69.1321	38.7347	51.9452	27.3256	0	0	0	1	0	1	1	1	1	1	4	2	1	1	2	2	3	1	3	3	1	4	1	4	4	1	2	1	4	2
2125	0	13	0	0	1	41.7606	24.9114	55.5115	61.0366	1	0	0	1	0	1	1	0	0	1	3	3	2	4	2	3	2	3	2	3	3	3	3	0	3	2	3	1	3	2
2130	1	7	0	0	1	38.3448	61.9268	43.508	59.8118	0	0	0	0	0	1	1	1	1	1	4	4	3	4	2	3	3	2	2	2	2	2	2	2	2	2	2	2	2	2
2136	0	9	0	0	0	49.7917	24.7452	59.4	46.3	0	0	0	0	0	1	0	1	0	1	3	4	1	4	3	2	4	2	2	1	2	4	3	1	3	2	2	1	2	2
2138	0	14	0	0	1	87.8903	65.6221	58.6122	34.5833	1	1	0	1	0	1	1	0	1	1	4	3	3	3	2	3	1	1	3	0	0	3	4	4	3	2	4	0	4	0
2147	0	15	0	0	1	67.7826	51.358	52.7098	57.046	1	0	1	1	1	0	1	1	1	1	2	4	4	1	2	3	2	3	3	2	4	0	1	4	2	3	1	1	3	4
2154	1	12	0	0	1	47.1429	29.9083	57.1519	47.2423	1	0	0	0	0	0	1	0	0	0	3	2	2	2	2	4	2	2	3	2	2	3	2	2	4	2	4	4	2	3
2157	0	13	0	0	0	45.2817	45.1646	57.5992	59.0041	1	0	0	1	0	0	1	1	1	1	4	4	3	4	4	4	2	1	2	3	3	3	4	0	2	1	1	3	4	4
22	0	12	1	0	0	39.0233	40.7237	38.5249	51.8372	1	1	1	1	1	0	1	1	1	1	2	0	0	0	2	0	0	0	0	0	0	0	0	0	1	0	0	0	0	0
32	1	11	1	0	1	43.9931	58.6622	42.0222	56.2972	1	0	1	1	0	0	1	0	1	1	1	0	0	0	1	0	0	0	0	0	3	0	0	0	0	0	0	0	1	0
47	1	11	1	0	0	43.9931	58.6622	33.1333	48.7406	1	0	0	1	0	0	1	0	1	1	1	1	1	1	2	0	0	0	0	0	0	1	0	0	0	0	0	0	1	0
51	0	8	1	0	1	39.6985	42.2414	42.9612	54.8442	0	0	0	0	0	0	1	0	0	1	2	1	0	0	2	0	0	0	0	0	1	1	0	0	1	0	0	0	0	0
92	1	8	1	0	1	40.1003	43.4129	36.9975	48.105	0	1	1	0	0	0	1	0	0	1	2	1	1	1	2	1	0	0	0	1	0	0	0	0	0	1	0	0	0	0
94	1	12	1	0	0	47.1429	14.6177	46.6034	47.2423	1	0	0	1	0	0	1	1	1	1	3	0	0	1	0	0	2	1	0	0	1	0	0	0	1	0	0	0	1	1
97	1	13	1	0	0	53.9403	52.7564	43.7822	51.0274	1	0	0	0	0	0	0	0	0	1	2	1	0	1	0	0	0	0	0	0	1	2	0	2	0	0	0	0	2	0
98	1	14	1	0	0	57.6786	29.491	46.5102	43.8562	1	0	0	1	0	0	1	1	1	1	1	0	1	2	0	0	0	0	1	1	0	1	1	0	2	0	0	0	0	0
99	1	14	1	0	0	54.1071	59.4311	44.4694	50.3922	0	0	0	0	0	1	0	0	1	1	1	0	0	0	2	0	1	1	0	1	0	1	1	1	1	0	0	0	0	0
114	1	8	1	0	1	63.5117	36.253	72.6209	45.1895	0	0	0	0	0	0	1	0	0	1	2	1	1	1	2	1	0	1	0	0	0	1	0	0	0	0	0	1	0	1
164	0	9	1	0	1	55	43.8535	43.8444	49.6333	0	0	0	0	0	1	1	1	0	1	1	1	3	0	2	0	2	0	1	0	0	1	0	0	0	0	0	0	2	0
175	1	7	1	0	1	45.2414	39.9756	38.9522	43.6828	0	0	0	1	0	1	1	1	1	1	0	1	0	1	2	0	2	1	0	1	0	2	0	2	0	1	0	0	1	0
180	1	10	1	1	1	68.5512	30.75	49.8915	37.548	1	0	0	0	0	1	0	1	1	1	1	1	1	1	0	1	1	1	1	1	1	1	1	1	0	1	0	0	1	0
185	1	11	1	0	0	47.4653	41.9398	37.5778	48.7406	1	0	0	0	0	1	1	1	1	1	1	0	1	1	0	0	0	1	0	3	0	0	0	0	0	0	0	0	4	3
199	1	14	1	0	0	46.9643	29.491	46.5102	39.4989	1	0	0	0	0	0	1	0	1	1	2	2	0	1	2	1	1	0	1	1	1	0	0	1	1	0	0	0	1	0
217	0	13	1	0	1	38.2394	50.2278	32.547	59.0041	1	0	0	1	0	0	1	0	1	1	1	1	1	0	1	0	1	0	1	0	1	1	1	1	1	0	1	0	2	0
229	1	7	1	0	1	38.3448	54.6098	36.6743	65.1882	1	0	0	0	0	0	1	1	0	1	3	2	2	1	2	0	0	0	2	0	0	0	0	0	0	0	2	0	0	0
230	1	7	1	0	1	45.2414	47.2927	41.2301	59.8118	1	1	1	1	0	1	1	1	1	1	1	2	1	0	2	2	1	0	0	0	0	2	0	1	0	0	2	0	0	0
239	1	11	1	0	1	33.5764	45.2843	42.0222	56.2972	1	0	0	1	0	1	1	1	1	1	1	2	2	0	2	0	1	0	1	2	0	0	0	0	1	0	0	0	1	1
241	1	12	1	0	1	40.3401	42.1407	44.4937	65.2835	1	0	0	1	0	0	0	0	0	0	3	1	0	0	1	2	1	0	1	2	1	1	0	0	0	0	1	0	1	0
242	1	12	1	0	1	47.1429	26.8502	50.8228	36.933	1	1	0	1	0	0	1	1	1	1	2	3	1	1	2	0	1	0	1	0	1	0	0	1	1	0	0	0	1	0
243	1	12	1	0	1	60.7483	57.4312	55.0422	65.2835	1	1	1	1	0	0	0	0	1	1	2	1	0	0	0	0	1	0	3	1	1	1	1	1	0	3	0	0	0	0
250	1	14	1	0	1	57.6786	44.4611	42.4286	41.6776	1	1	0	1	0	0	1	0	0	1	2	1	0	1	2	0	0	0	0	1	4	0	2	0	1	1	0	0	0	0
253	1	15	1	0	1	41.2238	41.5166	39.4269	56.347	1	1	0	1	0	1	1	0	0	1	3	1	1	1	2	0	0	0	1	1	1	1	1	0	1	0	1	0	1	0
266	0	13	1	0	1	66.4085	55.2911	55.5115	44.7764	0	0	0	0	0	0	1	0	1	1	1	2	2	2	0	0	0	0	1	2	1	0	0	1	1	0	1	0	3	1
308	1	15	1	0	1	72.6923	36.7773	57.2134	51.7808	1	0	0	1	0	0	0	0	0	1	0	2	1	3	2	0	1	1	0	1	0	1	0	1	0	1	0	0	0	1
357	1	13	1	0	1	59.9104	20.7051	49.7228	41.895	1	0	0	0	0	1	1	0	1	1	0	2	1	0	2	0	3	0	2	1	0	0	0	1	0	0	1	1	2	1
401	1	8	1	0	0	46.7893	48.1862	47.1756	53.9359	0	0	0	0	0	1	1	0	1	1	1	2	0	2	1	1	1	0	0	1	1	1	0	0	1	0	2	0	2	4
402	1	9	1	1	0	37.2615	36.4793	49.1522	30.5814	1	1	0	1	0	1	1	1	1	1	3	1	1	1	0	0	1	2	2	2	0	0	0	0	1	1	0	2	0	1
409	1	12	1	0	0	33.5374	36.0245	38.1646	60.1289	0	0	0	0	0	1	1	0	0	1	1	2	0	0	2	0	1	0	1	0	1	1	1	2	1	2	1	0	0	1
428	1	14	1	0	0	43.3929	38.4731	38.3469	50.3922	1	1	0	1	0	0	1	0	1	0	3	0	1	0	0	0	0	1	2	0	2	0	0	4	1	3	0	0	0	0
432	1	15	1	0	1	41.2238	55.7346	43.3794	65.4795	1	1	0	1	0	1	1	0	1	1	4	1	2	1	0	1	0	0	1	0	0	2	0	0	0	0	2	0	3	1
433	1	15	1	0	1	69.1958	39.1469	43.3794	28.9498	1	0	0	0	0	0	1	1	1	1	1	1	1	2	2	0	1	1	0	1	2	1	1	0	1	0	0	1	3	2
437	0	10	1	1	1	51.7727	42.9392	60.5973	53.3333	1	1	1	1	0	1	1	0	1	1	2	1	2	1	2	2	1	0	1	1	1	1	0	1	1	1	0	0	1	1
440	0	10	1	0	1	56.3182	42.9392	62.8097	58.1995	0	0	0	1	0	0	1	1	1	0	2	1	1	0	0	0	1	0	1	0	0	0	2	1	0	1	1	1	4	3
459	0	14	1	0	1	49.9156	49.4931	46.3673	51.7402	1	0	1	1	0	0	0	1	1	1	0	1	1	1	2	1	1	1	1	1	1	2	0	1	2	1	1	0	2	0
473	1	7	1	0	0	38.3448	47.2927	45.7859	54.4355	1	0	0	0	0	0	1	0	0	1	1	1	0	0	2	0	0	0	4	1	0	0	0	4	0	4	0	0	1	0
475	1	9	1	0	1	68.0308	39.4379	57.8478	48.0233	1	0	0	1	0	0	1	1	0	1	2	0	1	1	2	2	0	1	0	1	2	1	0	1	2	1	1	0	1	1
490	1	12	1	0	1	53.9456	14.6177	38.1646	34.3557	1	0	0	1	0	0	1	1	0	1	1	1	0	2	2	0	0	0	2	0	2	2	2	1	3	0	0	0	1	0
527	0	12	1	0	0	57.6279	47.3026	29.8482	42.5349	0	1	0	0	1	1	1	1	1	1	2	2	2	1	2	1	1	0	0	0	2	1	1	0	1	0	0	1	3	0
541	0	14	1	0	1	37.2574	49.4931	36.1633	61.5441	1	0	0	1	0	0	1	0	0	0	2	2	1	2	2	2	0	2	1	0	0	2	2	0	0	0	0	0	3	0
543	0	14	1	0	0	49.9156	58.7097	42.2857	61.5441	0	1	0	1	0	1	1	1	1	1	4	2	2	1	1	1	1	0	1	1	2	1	1	1	0	0	0	0	2	0
551	1	7	1	0	0	41.7931	44.8537	43.508	54.4355	1	0	0	1	0	0	0	0	0	0	2	0	1	0	2	0	0	4	0	1	2	0	2	2	0	1	2	0	1	0
554	1	8	1	0	0	43.4448	55.3461	44.631	59.7668	0	0	0	1	0	1	1	1	1	1	0	0	0	0	2	0	0	0	1	1	2	1	3	1	1	3	1	1	1	3
561	1	11	1	0	1	33.5764	58.6622	37.5778	58.8161	0	1	0	0	0	0	1	1	1	1	2	1	3	3	3	3	0	0	1	0	0	0	0	3	0	0	0	0	3	0
564	1	12	1	0	1	81.1565	54.3731	76.1392	42.0876	1	1	0	1	0	0	0	0	0	1	2	1	1	1	2	1	1	1	1	1	1	1	1	1	1	1	1	1	1	1
576	1	13	1	0	1	50.9552	49.5513	41.802	67.0091	1	1	0	1	0	1	1	1	1	1	2	2	2	1	2	2	0	0	2	1	0	1	1	1	1	0	1	0	0	0
592	0	8	1	0	1	64.8241	30.7471	50.2427	29.3484	0	0	0	0	0	0	1	0	1	1	2	0	1	1	2	4	1	1	1	1	1	0	1	1	1	1	0	0	1	2
613	0	13	1	0	0	52.3239	60.3544	57.5992	50.874	1	0	0	0	0	0	1	1	1	1	4	4	1	2	1	1	0	0	0	0	0	0	0	0	0	0	1	4	4	4
625	0	14	1	0	0	54.135	58.7097	60.6531	49.2892	1	0	0	0	0	0	1	0	0	0	0	2	2	0	1	2	0	1	4	0	0	0	0	0	4	0	0	0	4	0
627	0	14	1	0	1	62.5738	51.7972	56.5714	34.5833	1	1	1	1	0	1	1	1	1	1	2	1	1	3	0	0	0	1	2	1	1	0	1	3	1	1	2	0	3	1
642	1	10	1	0	0	36.7491	36.3056	36.8764	61.0021	0	0	0	0	0	0	1	0	0	1	2	1	1	1	2	1	0	1	2	2	2	1	1	2	1	1	1	0	0	0
646	1	11	1	0	1	40.5208	45.2843	46.4667	48.7406	0	0	0	0	0	0	1	0	0	1	1	1	0	2	2	0	0	0	4	1	1	1	0	1	2	2	1	0	3	1
647	1	11	1	0	1	43.9931	45.2843	62.0222	66.3728	1	0	0	1	0	1	1	0	0	1	0	1	2	1	2	1	2	1	2	1	2	1	2	1	1	0	0	0	2	0
651	1	11	1	0	1	40.5208	48.6288	48.6889	63.8539	1	1	1	1	0	0	1	1	1	0	1	2	3	1	1	0	0	0	4	1	0	1	2	2	0	0	0	0	3	0
664	1	13	1	0	0	47.9701	39.9359	45.7624	44.1781	1	0	0	0	0	0	1	1	0	1	2	1	1	1	1	0	0	1	0	0	0	2	1	2	1	0	2	0	4	2
739	1	12	1	0	0	53.9456	42.1407	59.2616	52.3969	0	0	0	0	0	0	1	1	0	1	0	2	0	0	2	0	0	0	1	0	0	2	3	3	2	0	0	0	2	4
748	1	13	1	0	0	53.9403	46.3462	69.5248	53.3105	0	1	0	1	0	1	1	1	1	1	1	2	1	2	2	1	1	3	2	2	0	1	0	0	1	0	0	2	2	2
754	1	14	1	1	1	50.5357	50.4491	58.7551	32.963	1	1	0	1	0	0	1	0	0	1	2	1	0	3	2	0	3	2	4	2	0	0	0	0	0	1	0	0	1	0
760	1	15	1	0	1	51.7133	41.5166	63.1423	33.516	1	1	0	1	0	0	1	0	1	1	2	2	1	2	2	1	1	0	1	1	3	1	1	1	1	1	1	0	2	0
779	0	12	1	0	0	57.6279	30.8553	42.8633	61.1395	0	1	0	1	0	1	1	0	1	1	1	2	2	2	1	1	1	1	2	1	2	1	2	1	1	2	0	0	1	0
781	0	12	1	0	0	43.6744	44.0132	47.2017	54.1628	0	1	0	0	0	0	1	0	1	1	2	3	2	0	2	2	0	0	0	3	2	0	2	2	0	1	1	0	2	0
801	0	15	1	0	0	37.3478	32.8395	36.9755	42.5182	1	0	0	0	0	0	0	0	0	1	2	0	4	1	2	1	1	1	2	1	2	1	1	0	3	0	1	0	1	0
806	1	7	1	0	1	65.931	35.0976	61.7312	43.6828	0	1	0	0	0	0	0	1	1	1	0	1	1	2	2	1	1	1	2	2	2	1	1	2	1	1	2	1	1	1
811	1	9	1	1	1	43.4154	30.5621	51.3261	51.8992	1	0	0	0	0	0	1	1	0	0	1	2	3	2	2	0	0	3	1	1	4	0	1	2	1	0	0	0	2	0
834	1	15	1	0	1	58.7063	53.3649	57.2134	56.347	0	0	0	1	0	0	1	0	1	1	0	0	1	1	4	0	3	1	0	1	0	0	4	4	3	0	0	0	0	0
835	1	15	1	0	1	55.2098	50.9953	43.3794	33.516	1	0	0	1	0	1	1	0	1	1	3	1	1	1	2	1	0	0	1	0	3	1	1	1	2	1	1	0	2	1
841	0	9	1	0	0	86.25	62.9618	46.0667	46.3	1	0	0	1	0	1	1	1	1	1	3	1	1	2	2	0	0	0	4	1	4	0	1	2	0	1	0	0	4	0
842	0	9	1	0	1	86.25	37.4841	57.1778	19.6333	0	0	0	0	0	0	1	0	1	1	0	2	0	0	1	0	1	2	1	3	2	0	0	2	2	2	4	2	1	0
843	0	9	1	0	0	39.375	53.4076	43.8444	56.3	1	0	0	0	0	0	1	0	0	1	1	1	3	1	1	1	0	0	1	0	4	2	1	1	1	1	1	0	4	0
849	0	11	1	0	0	88.9931	56.6173	65.77	49.505	0	1	0	1	0	0	1	1	1	1	2	1	3	2	2	2	0	0	1	1	2	2	1	0	0	0	1	2	3	3
870	0	14	1	0	0	41.4768	54.1014	48.4082	24.7794	1	0	0	1	0	0	1	0	0	1	3	2	1	1	0	1	0	0	4	0	2	3	2	1	2	0	0	0	2	0
875	0	15	1	0	1	33	39.0123	52.7098	47.3608	1	0	0	1	0	1	1	1	1	1	1	2	2	2	0	1	3	2	1	1	2	1	1	1	3	1	0	0	2	0
877	0	15	1	0	0	63.4348	45.1852	45.7168	54.6247	1	0	0	1	0	0	1	1	0	1	2	3	3	2	2	2	1	0	0	0	0	1	2	1	1	0	2	1	1	1
888	1	9	1	1	0	64.9538	36.4793	62.1957	48.0233	0	0	0	1	0	0	1	0	1	1	1	2	2	1	2	1	1	1	0	1	1	2	2	1	0	1	1	0	0	4
895	1	12	1	0	0	43.7415	48.2569	52.9325	44.6649	0	0	0	0	0	1	1	1	1	1	1	2	3	1	2	1	0	0	1	1	2	1	0	3	1	1	1	0	3	1
906	1	14	1	0	0	54.1071	38.4731	54.6735	50.3922	1	0	0	0	0	0	1	1	1	1	3	2	2	2	2	0	1	0	1	2	2	0	3	1	1	2	1	0	0	0
909	1	14	1	0	1	57.6786	38.4731	58.7551	37.3203	0	0	0	1	0	0	1	0	0	1	1	2	2	2	2	0	1	1	3	1	1	1	2	1	1	1	2	0	1	0
916	1	15	1	0	0	44.7203	39.1469	45.3557	40.3653	1	0	0	0	0	0	1	0	0	1	1	2	0	0	2	2	3	1	2	0	2	0	0	2	4	0	0	0	2	0
922	0	7	1	0	0	54.0377	42.8163	51.9452	46.7054	1	0	0	1	0	1	1	1	1	1	3	1	1	2	2	1	1	0	1	2	0	1	0	2	2	0	2	3	1	0
937	0	11	1	0	0	54.2708	41.8025	51.3963	55.4455	1	0	0	0	0	1	1	1	0	1	2	2	2	1	2	1	1	1	1	1	2	2	1	2	1	0	2	0	1	1
949	0	13	1	0	1	48.8028	37.5696	40.8977	50.874	1	0	0	1	0	0	1	0	0	1	3	2	1	1	2	0	0	1	2	1	1	2	1	3	2	0	1	1	2	0
953	0	14	1	1	0	49.9156	35.6682	58.6122	44.3873	1	0	0	0	0	0	0	1	1	1	2	0	3	1	2	1	0	3	0	1	1	0	1	0	4	0	0	0	4	3
961	0	14	1	0	0	45.6962	42.5806	64.7347	49.2892	0	1	0	1	0	0	1	0	1	1	3	2	2	1	2	1	0	3	4	0	0	2	1	0	2	0	1	0	1	0
970	1	7	1	0	1	34.8966	54.6098	41.2301	57.1237	0	0	0	0	0	1	1	1	1	1	3	0	2	2	2	2	2	0	1	0	3	3	2	0	0	0	0	0	4	0
971	1	7	1	0	1	45.2414	57.0488	48.0638	59.8118	0	0	1	1	0	1	0	1	1	1	3	2	1	1	2	2	1	0	1	2	0	1	2	2	2	0	0	0	3	0
975	1	8	1	1	0	40.1003	48.1862	44.631	53.9359	0	0	0	1	0	1	1	1	0	1	3	2	1	2	1	2	1	0	1	2	1	1	0	2	2	0	2	0	4	0
979	1	10	1	0	0	43.8163	44.6389	47.7223	35.4158	1	1	0	0	0	1	1	1	1	1	3	2	1	2	0	0	1	2	4	1	0	0	1	0	1	1	4	0	3	0
980	1	10	1	0	1	54.417	41.8611	45.5531	43.9446	1	0	0	0	0	0	1	0	1	1	2	1	1	1	2	1	2	1	1	1	3	1	1	0	1	1	1	1	4	0
990	1	11	1	1	1	75.2431	25.2174	48.6889	51.2594	0	1	1	1	0	0	1	0	0	0	1	2	0	2	1	0	1	0	2	3	4	0	2	1	3	0	4	0	2	1
1007	1	13	1	0	0	53.9403	33.5256	61.604	57.8767	1	0	0	1	0	0	0	0	1	0	2	0	0	2	0	0	3	1	0	2	4	4	1	1	4	0	0	0	4	0
1018	1	15	1	0	1	55.2098	48.6256	59.1897	40.3653	1	1	0	1	0	0	1	0	0	1	1	2	2	3	2	3	2	2	0	1	2	0	0	2	3	0	0	0	0	0
1023	0	8	1	0	0	39.6985	47.9885	42.9612	57.6771	0	0	0	1	0	1	1	1	1	1	2	2	1	1	2	0	0	1	0	2	4	3	2	0	1	0	3	0	4	0
1024	0	8	1	0	0	39.6985	42.2414	47.8155	54.8442	0	0	0	1	0	1	1	1	1	1	3	2	1	2	2	2	1	0	1	2	1	1	0	2	2	0	2	0	4	0
1025	0	8	1	1	0	39.6985	53.7356	45.3883	54.8442	0	0	0	1	0	1	1	1	1	1	3	2	1	2	2	1	2	1	0	1	2	0	2	0	2	2	2	0	3	0
1028	0	9	1	0	0	49.7917	43.8535	52.7333	52.9667	1	0	0	1	0	1	1	1	1	1	3	2	1	2	2	1	2	0	1	2	1	2	0	1	2	0	2	0	4	0
1030	0	9	1	0	0	44.5833	43.8535	59.4	59.6333	0	0	0	0	0	1	1	0	1	0	2	4	1	0	1	2	0	1	0	1	2	3	2	0	1	1	0	1	4	1
1031	0	9	1	0	0	65.4167	37.4841	50.5111	39.6333	1	0	0	1	0	1	1	1	1	1	2	2	1	0	2	0	1	2	2	1	1	2	2	1	1	2	1	1	1	2
1061	0	12	1	0	1	39.0233	20.9868	42.8633	33.2326	1	0	0	1	0	1	1	1	1	1	1	2	2	1	2	0	1	2	3	3	2	1	1	2	1	1	1	0	0	1
1066	0	13	1	0	1	41.7606	52.7595	51.3361	59.0041	1	0	0	1	0	0	1	1	0	1	2	3	1	4	2	1	2	0	3	1	0	0	0	0	1	3	2	0	4	0
1068	0	13	1	0	1	52.3239	52.7595	40.8977	59.0041	1	0	0	1	0	0	1	0	1	1	1	2	2	1	2	1	1	2	2	1	1	1	1	1	2	1	2	1	2	1
1074	0	14	1	0	1	45.6962	56.4055	56.5714	44.3873	1	0	0	1	0	0	1	1	1	1	3	2	3	4	2	2	1	0	1	1	0	4	0	0	1	0	0	1	4	0
1083	0	15	1	0	0	33	23.5802	42.2203	35.2542	1	0	0	1	0	1	1	0	1	1	3	1	1	1	2	1	1	2	1	2	1	1	2	2	2	0	1	0	3	0
1088	1	7	1	0	1	76.2759	35.0976	68.5649	35.6183	1	0	0	0	0	0	1	1	0	0	0	1	1	2	2	1	2	1	0	1	1	1	2	2	1	2	3	3	2	1
1091	1	8	1	0	0	56.8227	52.9594	54.8092	27.6968	1	0	1	1	0	1	1	1	1	1	1	2	2	0	1	1	2	1	3	1	0	3	2	1	1	0	0	3	1	3
1092	1	8	1	0	0	53.4783	48.1862	54.8092	45.1895	0	0	0	1	0	1	1	1	1	1	3	2	1	1	2	1	1	1	2	1	1	2	0	2	1	0	2	0	4	0
1100	1	10	1	0	0	65.0177	36.3056	75.9219	46.0768	0	0	0	0	0	0	1	1	1	1	2	1	1	1	2	0	1	1	1	1	3	3	1	2	1	2	1	1	2	1
1106	1	11	1	0	1	47.4653	45.2843	44.2444	51.2594	0	1	1	0	1	1	1	1	1	1	2	2	1	1	1	0	1	0	3	2	1	2	0	1	1	2	1	3	3	2
1107	1	11	1	0	0	43.9931	41.9398	39.8	33.6272	1	1	0	1	0	1	1	1	1	1	3	2	1	2	0	0	1	2	4	1	0	1	1	0	1	1	4	0	3	0
1141	0	7	1	0	0	38.9434	55.0612	46.4658	54.4574	1	0	0	1	0	1	1	1	1	1	3	2	1	2	2	2	1	0	1	2	0	2	0	2	2	0	2	0	4	0
1142	0	7	1	1	1	54.0377	46.898	60.1644	23.4496	1	0	0	1	0	0	1	1	0	1	4	3	2	0	2	0	0	0	4	0	0	0	0	2	3	0	3	0	2	1
1144	0	8	1	0	1	44.7236	39.3678	50.2427	37.847	0	0	1	1	0	1	1	1	1	1	1	1	1	2	2	2	2	0	1	0	2	2	2	0	4	0	2	0	4	0
1147	0	9	1	1	1	65.4167	47.0382	59.4	39.6333	0	0	0	1	0	1	1	0	0	1	3	1	2	2	0	0	1	0	4	1	3	1	0	3	2	3	0	0	3	0
1148	0	9	1	0	0	49.7917	43.8535	57.1778	52.9667	1	0	0	0	0	0	1	1	1	1	3	4	1	0	1	2	2	2	2	1	1	1	1	1	1	1	1	1	1	1
1151	0	10	1	0	1	56.3182	32.8041	51.7478	58.1995	0	0	0	0	0	0	1	0	1	1	2	2	0	2	2	2	0	2	1	2	2	1	3	1	2	0	2	0	2	2
1159	0	11	1	0	0	47.3264	41.8025	53.4497	51.4851	1	0	0	0	0	0	1	0	0	1	2	1	0	1	1	2	3	1	3	1	2	1	2	1	2	3	0	0	2	0
1169	0	12	1	0	0	62.2791	40.7237	64.5553	37.8837	1	0	0	0	0	1	1	1	0	1	2	1	1	2	2	0	0	1	2	0	1	2	3	2	1	2	1	0	4	1
1170	0	12	1	0	1	80.8837	20.9868	45.0325	33.2326	1	1	0	0	0	1	1	1	0	0	2	3	3	1	1	2	1	1	1	2	1	3	1	2	1	0	1	0	2	0
1171	0	12	1	0	1	48.3256	27.5658	45.0325	63.4651	1	0	1	1	0	1	1	1	1	1	2	1	2	1	2	2	1	1	2	1	2	1	1	1	1	2	1	2	2	1
1181	0	14	1	0	1	49.9156	40.2765	44.3265	59.0931	1	0	0	1	0	1	0	1	1	1	2	1	2	3	2	0	3	2	1	1	2	1	1	2	2	1	1	0	1	0
1192	0	15	1	0	0	50.3913	48.2716	63.1993	42.5182	1	0	0	1	0	1	1	0	1	1	3	4	3	2	1	1	0	0	2	2	3	4	2	0	0	0	0	0	3	0
1193	0	15	1	0	1	54.7391	51.358	59.7028	42.5182	1	0	0	0	0	0	1	1	1	1	3	3	2	1	2	1	0	0	1	1	1	3	2	0	1	0	3	1	3	1
1199	1	7	1	0	0	41.7931	52.1707	52.6196	54.4355	1	0	0	1	0	0	1	0	0	1	1	3	1	1	2	1	0	2	1	2	1	4	1	2	2	0	1	0	3	0
1205	1	9	1	0	0	61.8769	27.6036	57.8478	44.1473	1	0	1	0	0	1	0	1	1	1	2	3	0	1	2	0	2	4	1	4	1	1	1	1	0	0	0	0	0	4
1210	1	11	1	0	0	40.5208	45.2843	39.8	36.1461	1	1	0	0	0	1	1	1	1	1	3	2	1	2	2	0	1	2	4	2	0	1	1	0	3	1	0	0	3	0
1221	1	13	1	0	1	42	52.7564	45.7624	62.4429	1	0	0	1	0	1	1	1	1	1	3	4	3	2	1	1	2	0	2	1	2	0	1	2	0	0	1	0	3	1
1222	1	13	1	0	0	36.0299	43.141	59.6238	37.3288	1	0	0	0	0	0	1	1	1	1	4	2	1	3	2	1	2	0	3	1	1	4	2	0	0	1	0	0	0	0
1224	1	14	1	0	0	54.1071	50.4491	66.9184	50.3922	1	0	0	1	0	1	1	1	1	1	1	2	2	1	1	1	0	1	2	1	2	3	2	1	3	1	1	1	2	1
1236	0	8	1	0	0	44.7236	47.9885	40.534	52.0113	1	0	0	1	0	1	1	1	1	1	3	1	2	1	1	2	1	0	1	2	1	2	2	2	2	0	2	0	4	0
1248	0	11	1	0	1	64.6875	46.7407	61.6632	41.5842	1	1	0	1	0	1	1	1	1	0	1	1	0	0	2	1	1	3	2	0	1	3	2	1	2	0	1	0	3	3
1255	0	12	1	0	0	43.6744	47.3026	47.2017	56.4884	0	0	0	1	0	0	1	1	1	1	3	4	2	2	2	2	1	0	1	1	2	2	1	1	1	0	2	0	3	0
1256	0	12	1	0	0	48.3256	50.5921	51.5401	63.4651	1	0	0	1	0	1	1	0	1	0	2	1	2	1	2	1	0	0	2	3	3	3	1	2	0	1	2	3	2	1
1265	0	13	1	0	0	48.8028	37.5696	42.9854	56.9715	1	0	0	0	0	0	1	0	0	0	3	2	2	1	2	2	1	1	2	1	1	1	1	2	2	1	1	0	2	1
1270	0	13	1	0	0	48.8028	52.7595	55.5115	44.7764	1	1	1	1	0	1	1	1	1	1	2	2	3	2	2	0	2	0	1	2	2	3	1	0	1	1	2	2	3	2
1294	1	9	1	0	0	58.8	27.6036	51.3261	44.1473	0	1	1	1	0	1	1	1	1	1	2	2	1	2	2	2	2	0	1	1	3	2	3	2	1	0	1	1	1	1
1311	1	12	1	0	1	50.5442	42.1407	42.384	54.9742	0	1	0	0	0	0	0	0	0	1	0	1	2	1	2	0	1	2	1	1	0	1	2	3	4	2	0	0	2	3
1324	1	14	1	0	0	39.8214	47.4551	36.3061	61.2854	1	1	0	1	0	1	1	1	1	1	2	3	2	1	2	1	0	0	3	1	4	2	1	1	1	0	1	0	3	1
1336	0	9	1	0	1	60.2083	24.7452	63.8444	29.6333	0	1	1	1	1	0	1	0	0	1	1	4	2	0	2	2	1	0	2	4	1	3	1	1	0	2	1	2	0	0
1379	0	14	1	1	0	66.7932	31.0599	64.7347	49.2892	0	1	1	0	0	0	0	1	1	0	0	0	0	1	0	2	3	4	4	4	3	0	2	4	4	0	0	0	0	0
1388	1	7	1	0	1	45.2414	42.4146	52.6196	51.7473	1	0	1	1	1	1	0	0	1	1	2	3	1	0	2	0	0	2	0	2	1	0	2	2	3	1	4	0	4	0
1404	1	11	1	0	0	43.9931	45.2843	55.3556	46.2217	0	0	0	1	0	0	1	0	1	1	1	1	2	0	2	1	0	2	1	4	1	2	2	0	2	1	3	2	2	1
1413	1	13	1	0	1	47.9701	33.5256	59.6238	39.6119	0	0	0	0	0	0	1	1	1	1	2	3	2	1	1	1	1	0	3	2	1	2	3	1	2	1	0	0	3	1
1419	1	15	1	0	1	48.2168	41.5166	65.1186	47.2146	1	1	1	1	0	1	1	1	0	1	4	3	2	1	1	1	1	1	2	2	2	1	2	0	1	1	1	0	3	2
1424	0	7	1	0	0	42.717	46.898	46.4658	54.4574	1	0	0	0	0	1	1	0	0	1	2	3	1	0	0	0	2	0	2	1	0	2	2	3	1	4	2	0	4	0
1427	0	8	1	1	1	44.7236	39.3678	42.9612	52.0113	1	0	0	0	0	1	1	1	1	1	3	2	1	2	2	2	1	0	2	2	0	1	2	2	2	0	2	0	4	1
1428	0	8	1	0	0	34.6734	45.1149	42.9612	57.6771	0	0	0	1	0	1	1	1	1	1	3	3	2	2	0	2	2	0	1	2	2	4	2	0	4	0	0	0	4	0
1472	1	8	1	1	0	40.1003	52.9594	44.631	59.7668	1	1	0	1	0	1	1	1	1	1	4	2	2	2	2	2	2	2	2	2	1	1	1	1	1	1	1	1	1	1
1475	1	8	1	0	0	40.1003	48.1862	44.631	62.6822	1	0	0	1	0	1	1	1	1	1	4	2	2	2	2	2	2	2	2	2	1	1	1	1	1	1	1	1	1	1
1503	1	13	1	0	1	65.8806	30.3205	57.6436	46.4612	0	0	0	1	0	1	1	0	1	0	2	1	1	1	2	2	1	2	3	1	2	1	2	1	2	1	2	2	1	3
1515	1	15	1	0	0	58.7063	43.8863	61.166	44.9315	1	0	1	1	0	1	1	1	1	1	2	1	2	2	2	2	2	2	2	2	2	2	1	1	1	1	2	2	1	1
1516	1	15	1	0	0	65.6993	39.1469	61.166	44.9315	1	0	1	0	0	1	1	1	1	1	1	2	2	2	2	0	0	2	2	3	2	2	3	2	0	2	3	1	2	1
1525	0	9	1	1	0	55	34.2994	43.8444	59.6333	1	0	0	1	0	0	1	1	1	0	3	4	3	3	2	2	1	0	4	0	2	2	1	0	2	0	0	0	3	1
1526	0	9	1	0	1	60.2083	15.1911	54.9556	22.9667	1	1	0	0	1	0	1	1	1	1	2	1	1	3	2	1	1	1	2	3	0	4	1	0	2	2	1	1	1	3
1528	0	9	1	0	0	44.5833	47.0382	57.1778	56.3	1	0	0	1	0	1	0	1	1	1	2	1	2	3	2	2	0	2	1	3	0	1	1	4	2	0	1	2	3	3
1539	0	12	1	0	1	52.9767	47.3026	64.5553	56.4884	0	0	0	1	0	0	1	0	1	0	1	1	1	2	1	0	0	0	4	2	1	3	3	4	1	1	4	0	4	0
1542	0	13	1	0	1	48.8028	45.1646	55.5115	52.9065	1	0	0	1	0	1	1	0	1	1	2	3	2	2	2	1	0	1	2	1	1	2	3	1	1	0	1	1	4	4
1552	1	7	1	0	0	52.1379	39.9756	45.7859	46.371	0	0	0	1	0	1	0	0	1	1	2	3	1	0	2	0	2	2	0	2	0	2	2	3	3	0	2	0	4	0
1557	1	9	1	0	1	58.8	39.4379	53.5	48.0233	1	0	0	1	0	1	1	0	1	1	4	1	1	2	2	2	1	4	0	1	3	3	1	2	2	0	0	0	1	2
1564	1	12	1	0	1	40.3401	45.1988	46.6034	49.8196	0	0	0	0	0	1	1	1	1	1	1	1	2	1	2	2	4	0	1	0	3	2	0	3	1	3	0	4	1	3
1566	1	12	1	0	0	36.9388	36.0245	38.1646	60.1289	0	0	1	1	0	0	1	0	1	1	3	3	1	1	2	2	1	0	3	1	1	2	1	1	1	3	2	1	3	1
1568	1	12	1	0	0	36.9388	39.0826	55.0422	57.5515	1	0	0	1	0	1	1	1	1	1	4	2	3	1	2	0	4	0	1	0	1	3	2	1	1	3	0	2	1	0
1575	1	14	1	0	0	61.25	47.4551	50.5918	46.0349	1	1	0	0	0	0	0	0	0	1	0	2	2	1	1	0	2	1	1	1	1	1	4	4	4	4	1	0	0	1
1576	1	14	1	0	0	32.6786	20.509	60.7959	37.3203	1	1	1	1	1	0	1	1	1	1	3	2	1	2	2	2	0	1	2	2	3	3	3	2	1	2	1	0	2	0
1578	1	14	1	0	1	54.1071	41.4671	66.9184	39.4989	0	0	0	1	0	0	1	0	1	1	4	0	1	3	2	0	4	4	1	4	0	1	0	0	4	1	0	1	0	1
1583	1	15	1	0	0	51.7133	43.8863	65.1186	35.7991	1	0	0	1	0	0	1	1	1	1	1	2	2	1	2	0	1	2	3	2	2	2	1	1	1	4	0	1	2	4
1589	0	8	1	0	0	39.6985	42.2414	38.1068	54.8442	1	0	0	1	0	1	1	0	0	1	2	3	1	0	2	0	2	0	2	1	0	2	2	3	1	4	2	0	4	0
1598	0	10	1	0	1	88.1364	39.5608	62.8097	48.4672	1	0	0	1	0	1	1	0	1	1	2	1	2	1	1	1	2	3	1	2	0	2	3	1	2	3	1	1	0	3
1600	0	10	1	0	0	56.3182	29.4257	47.323	29.0024	1	1	0	1	0	1	1	1	1	1	2	1	1	2	1	2	1	2	4	1	0	3	1	3	1	1	4	0	3	0
1609	0	13	1	0	0	48.8028	47.6962	47.1608	48.8415	1	1	1	1	0	0	1	1	0	1	1	3	2	3	2	2	0	1	4	3	2	1	2	1	2	1	2	1	3	1
1614	0	14	1	0	0	41.4768	44.8848	52.4898	56.6422	1	1	0	0	0	0	1	0	0	1	4	2	3	2	2	2	1	1	1	1	3	3	4	0	1	0	0	0	4	0
1616	0	14	1	0	1	66.7932	35.6682	54.5306	46.8382	1	0	0	1	0	0	1	0	0	1	2	3	3	2	2	2	1	1	1	1	1	4	3	0	1	1	2	0	3	1
1630	1	8	1	0	0	40.1003	48.1862	39.542	62.6822	1	0	0	1	0	1	1	0	0	1	2	3	1	0	2	0	2	0	2	1	0	2	2	3	1	4	2	0	4	0
1631	1	8	1	1	0	43.4448	45.7995	44.631	56.8513	1	0	0	0	1	1	1	1	1	1	3	1	2	2	2	2	2	0	1	1	2	4	2	0	4	0	1	1	4	0
1634	1	9	1	0	1	58.8	33.5207	49.1522	49.9612	0	1	0	0	0	0	1	0	1	1	2	1	2	2	2	1	3	4	0	3	2	1	0	3	0	1	2	1	2	4
1659	1	15	1	0	1	37.7273	60.4739	35.4743	60.9132	1	0	0	0	0	0	1	0	0	1	2	1	1	2	2	0	0	1	4	2	1	2	2	3	2	0	1	4	4	0
1667	0	8	1	1	1	69.8492	42.2414	59.9515	40.6799	1	1	1	1	1	1	1	1	1	1	1	3	4	3	1	2	1	1	1	1	2	1	0	2	3	2	1	4	1	3
1686	0	12	1	0	1	52.9767	44.0132	58.0477	61.1395	1	1	0	1	0	0	1	1	1	1	2	3	4	1	1	2	3	0	1	2	1	2	3	0	1	2	1	1	4	1
1707	1	9	1	0	1	71.1077	54.2308	70.8913	42.2093	1	1	1	1	1	1	1	1	1	1	1	2	4	2	2	2	4	2	1	2	1	1	1	1	1	1	1	1	4	2
1731	1	13	1	0	1	44.9851	55.9615	57.6436	46.4612	1	1	0	0	0	1	1	1	1	1	1	2	3	1	2	1	1	2	3	2	2	2	3	1	2	0	1	1	3	3
1749	0	10	1	0	0	51.7727	26.0473	58.385	31.4355	1	1	0	1	0	0	1	1	1	1	1	2	3	2	2	1	1	1	4	2	4	1	3	1	3	1	1	1	3	1
1755	0	11	1	0	0	50.7986	36.8642	45.2361	41.5842	1	0	0	0	0	1	1	1	0	1	3	2	1	2	2	1	1	2	4	3	1	3	1	1	1	1	4	0	3	0
1760	0	12	1	0	1	52.9767	44.0132	62.3861	42.5349	1	1	1	1	0	1	1	1	1	1	2	3	2	2	2	1	2	1	2	3	2	3	3	3	2	1	1	0	1	0
1776	1	7	1	0	0	34.8966	42.4146	48.0638	51.7473	1	0	0	1	0	1	1	1	1	1	1	1	2	2	2	1	1	4	3	2	0	1	2	2	2	1	1	3	4	0
1785	1	10	1	0	1	47.3498	55.75	54.2299	61.0021	1	0	0	1	0	1	1	0	0	1	2	1	2	1	4	1	0	4	2	3	2	3	4	0	1	2	1	0	3	0
1789	1	12	1	0	0	50.5442	39.0826	57.1519	34.3557	0	1	0	1	0	0	1	1	1	1	3	4	2	3	2	0	1	2	2	1	3	2	3	1	2	1	1	0	3	1
1790	1	12	1	0	1	53.9456	29.9083	63.481	47.2423	1	1	1	1	0	0	0	0	1	1	2	1	2	2	1	0	3	1	2	2	0	2	4	4	2	1	0	4	0	2
1797	1	14	1	1	1	43.3929	50.4491	48.551	50.3922	1	0	0	1	0	0	1	1	0	1	4	3	4	2	2	0	2	3	2	1	2	3	1	0	1	0	2	0	4	0
1803	0	7	1	0	0	54.0377	38.7347	43.726	42.8295	1	0	1	0	0	1	1	1	1	1	1	1	2	1	2	2	2	1	2	2	3	4	3	3	2	2	1	2	0	0
1817	0	9	1	0	0	39.375	37.4841	54.9556	59.6333	0	0	0	1	0	1	1	1	1	1	3	1	2	2	2	2	2	1	1	1	4	2	2	0	4	2	2	2	0	0
1818	0	9	1	0	1	75.8333	47.0382	77.1778	32.9667	0	0	0	1	0	1	0	1	1	1	4	1	1	1	2	1	1	1	2	1	2	4	2	2	1	2	1	3	4	1
1823	0	10	1	0	0	65.4091	32.8041	60.5973	31.4355	1	0	0	0	0	0	1	1	1	1	0	2	3	1	2	3	1	2	4	4	2	0	2	1	2	4	2	1	0	1
1837	0	13	1	0	0	45.2817	52.7595	51.3361	42.7439	1	0	0	0	0	0	1	1	1	1	3	1	3	3	0	0	2	2	3	1	2	1	4	2	4	1	3	0	1	0
1850	1	8	1	0	0	50.1338	33.8663	59.8982	53.9359	1	1	1	1	0	1	1	1	1	0	2	2	1	1	2	2	2	2	1	1	2	2	1	2	1	4	4	0	4	0
1852	1	9	1	0	0	52.6462	45.355	55.6739	46.0853	1	0	0	1	0	0	1	1	1	1	1	2	3	1	2	3	1	3	2	0	4	1	3	1	0	0	2	2	4	2
1855	1	10	1	0	1	50.8834	25.1944	67.2451	43.9446	1	0	1	1	0	1	1	1	1	1	3	2	1	4	2	2	3	0	1	3	1	2	0	2	1	4	0	4	0	2
1858	1	11	1	0	1	54.4097	25.2174	55.3556	43.7028	1	0	0	1	0	1	1	1	1	1	1	2	1	0	2	2	1	3	4	0	2	1	3	1	3	1	3	1	3	0
1863	1	12	1	0	0	77.7551	36.0245	50.8228	42.0876	0	0	0	0	0	0	1	0	0	1	4	2	1	2	2	1	0	4	0	4	1	3	1	3	1	3	1	0	1	2
1864	1	12	1	0	1	47.1429	36.0245	55.0422	49.8196	0	0	0	1	0	1	1	0	1	1	3	1	2	1	2	2	3	1	3	1	1	3	2	3	2	1	2	0	3	0
1892	0	13	1	0	1	41.7606	42.6329	55.5115	56.9715	1	0	0	0	0	0	1	1	1	1	1	2	1	2	0	1	4	1	3	3	1	4	3	2	3	0	0	4	3	0
1904	1	8	1	0	1	60.1672	45.7995	52.2646	48.105	1	1	1	1	0	1	1	1	1	1	3	1	2	2	2	2	2	0	1	2	2	4	2	0	4	0	2	4	4	0
1912	1	11	1	0	0	37.0486	45.2843	68.6889	58.8161	1	1	1	1	0	1	1	1	1	1	3	2	1	2	1	4	2	2	1	1	2	2	3	3	2	1	1	0	3	2
1917	1	15	1	0	1	37.7273	55.7346	37.4506	60.9132	1	0	0	0	0	0	1	1	1	1	3	4	3	1	2	2	1	0	4	0	2	0	2	0	1	3	4	0	4	0
1920	1	15	1	0	0	65.6993	53.3649	67.0949	35.7991	1	0	0	1	0	0	1	1	0	1	1	1	2	2	2	1	2	3	1	3	2	3	1	3	1	4	1	2	4	1
1936	0	13	1	0	1	48.8028	55.2911	55.5115	50.874	0	1	1	0	1	1	1	1	1	1	4	2	4	1	2	0	0	0	4	0	0	4	4	0	0	0	4	4	4	4
[truncated: 200 more rows]
